# Supplementary material
Source: publisher figshare collection journal article supplement (https://acs.figshare.com/ndownloader/files/3805240)
Supplement: Supplementary file 1 [file 3805240]

## Sheet: Sheet1
Supplementary Table 1.Complete list of proteins identified from Trichophyton_rubrum and the corresponding supporting peptides.
A total of 4,291 proteins were confirmed with 35,874 supporting peptides. Peptide ID denotes the peptide identifier displayed in the Genome Browser. The peptides are designated as ANPXXX, where ANP stands for annotation supporting peptide and “XXX” denotes the serial number of the peptide. PEP (posterior error probability) denotes the probability that the observed PSM (peptide-spectrum match) is …
Accession	# AAs	MW [kDa]	calc. pI	Description	Σ# Peptides	ΣCoverage	Genome co-ordinate of gene	Peptide ID	Peptide sequence	Modification	PEP	Charge_Mascot	m/z_Mascot	Charge_Sequest	m/z_Sequest	IonScore_Mascot	Xcorr_Sequest	Mass error_Mascot (ppm)	Mass error_Sequext (ppm)	Genome co-ordinate of peptide	Exon map
TERG_00003T0	498	54.4	6.2	Trichophyton_rubrum_CBS_118892_26S_proteasome_regulatory_subunit_(499_aa)	15	0.4317	supercont2.1,+:16137-17795	ANP00001	YPNLSLSQDIFNLSNPACHASSR	C18(Carboxymethyl)	1.36e-12	3	864.74	3	864.74	76.65	5.23596	-3.29541	-3.29541	supercont2.1,+:16164-16232	exon1
								ANP00002	HLAHPVEGVLNSTGEGSSQPPAAAGSSPGSTGVVVMSDMLAR		0.00290554			4	1015.25		2.04007		0.73099	supercont2.1,+:16296-16421	exon1
								ANP00003	SELVWDEK		0.00326162	2	503.248	2	503.248	22.56	1.68148	0.572526	0.572526	supercont2.1,+:16440-16463	exon1
								ANP00004	ELDELTKEEEEAAEAAGETEVQAAR		1.37e-07	3	906.754	3	906.754	87.36	5.26391	-4.30349	-4.30349	supercont2.1,+:16497-16571	exon1
								ANP00005	EEEEAAEAAGETEVQAAR		1.34e-15	2	945.419	2	945.419	93.99	4.24723	-2.76379	-2.76379	supercont2.1,+:16518-16571	exon1
								ANP00008	IDIVLAMVR		9.8e-07	2	515.312	2	515.312	61.47	2.76463	3.63564	3.63564	supercont2.1,+:16745-16771	exon2
								ANP00009	IGLFFGDK		0.00117763	2	448.75	2	448.75	32.61	1.82428	4.97688	4.97688	supercont2.1,+:16772-16795	exon2
								ANP00010	ANTLVESGGDWDR		0.000185665	2	710.329	2	710.329	43.42	2.56646	0.333162	0.333162	supercont2.1,+:16823-16861	exon2
								ANP00011	GLHLLTIR		0.00128291	3	308.2	3	308.2	20.51	2.29962	1.5019	1.5019	supercont2.1,+:16886-16909	exon2
								ANP00015	LVSSLYMGQYR		8.92e-05	2	658.836	2	658.836	39.16	1.9555	-1.67323	-1.67323	supercont2.1,+:17291-17323	exon2
								ANP00016	SFFSALAAVEDNFLSQDR		3.82e-16	2	1008.99	2	1008.99	85.24	4.38634	4.3314	4.3314	supercont2.1,+:17324-17377	exon2
								ANP00017	GYQQLLQSYR		2.34e-06	2	628.324	2	628.324	50.1	2.51944	-1.86572	-1.86572	supercont2.1,+:17426-17455	exon2
								ANP00018	VVGLASMAGDFGVTVDFLDR		2.04e-05	2	1035.02	2	1035.02	41.16	2.97435	-2.22707	-2.22707	supercont2.1,+:17456-17515	exon2
								ANP00019	ISCTIDRVNGIIETNRPDDK	C3(Carboxymethyl)	0.000328839	3	773.056	3	773.056	18.32	2.14194	3.15774	3.15774	supercont2.1,+:17634-17693	exon3
								ANP00020	VNGIIETNRPDDK		9.33e-05	2	735.882	2	735.882	50.67	2.67247	0.697738	0.697738	supercont2.1,+:17655-17693	exon3
TERG_00004T0	482	52.9	6.35	Trichophyton_rubrum_CBS_118892_alanine_aminotransferase_(483_aa)	23	0.6743	supercont2.1,+:18581-20083	ANP00022	TNINPNVINAQYAVR		5.48e-09	2	843.948	2	843.948	78.38	4.06469	-2.62821	-2.62821	supercont2.1,+:18605-18649	exon1
								ANP00023	VIFANIGNPQQLEQKPITFSR		0.000157471	3	800.77	3	800.77	31.93	2.37359	-2.82189	-2.82189	supercont2.1,+:18722-18784	exon1
								ANP00024	QVLSLLEYPPLLQNEEALK		3.82e-16	2	1099.11	2	1099.11	69.17	4.69448	2.5342	2.31636	supercont2.1,+:18785-18841	exon1
								ANP00025	TLLADVQSVGAYSQSLGAPGIR		2.91e-16	2	1102.09	2	1102.09	114.75	5.07498	-0.288763	-0.288763	supercont2.1,+:18884-18949	exon1
								ANP00026	QSVADFIAR		0.000103012	2	503.768	2	503.768	71.79	2.28007	-2.35468	-2.35468	supercont2.1,+:18950-18976	exon1
								ANP00027	RDGFPASQK		0.00408074	2	503.259	2	503.259	20.79	2.7521	0.00685573	0.00685573	supercont2.1,+:18977-19003	exon1
								ANP00029	DIYLTGGASAGVSTILNVICAGK	C20(Carboxymethyl)	1.09e-11	2	1141.1	2	1141.1	96.59	5.86844	4.13057	4.13057	supercont2.1,+:19004-19072	exon1
								ANP00030	AIVIINPGNPTGASLNPAAIK		3.17e-16	2	1016.08	2	1016.08	77.56	4.90922	-1.26001	-1.26001	supercont2.1,+:19247-19309	exon1
								ANP00031	AIVIINPGNPTGASLNPAAIKDVIDIAAEK		8.81e-07	3	995.893	3	995.893	32.74	2.98556	0.617172	0.617172	supercont2.1,+:19247-19336	exon1
								ANP00032	DVIDIAAEK		3.13e-06	1	973.52	1	973.52	64.27	2.55049	-0.22386	-0.22386	supercont2.1,+:19310-19336	exon1
								ANP00033	SLVIIADEVYQTNVFK		3.82e-16	2	920	2	920	112.59	4.55787	1.47701	1.40999	supercont2.1,+:19337-19384	exon1
								ANP00034	ELQAEFPGK		0.000991678	2	509.764	2	509.764	40.77	1.96477	1.09051	1.09051	supercont2.1,+:19418-19444	exon1
								ANP00035	ELQAEFPGKYDGIELVSLHSVSK		6.67e-08	3	849.447	3	849.447	30.03	3.07579	4.44644	4.44644	supercont2.1,+:19418-19486	exon1
								ANP00036	YDGIELVSLHSVSK		2.04e-09	2	773.907	2	773.907	56.86	3.32529	-2.39303	-2.39303	supercont2.1,+:19445-19486	exon1
								ANP00037	GGYFELVGFKPEVVEQVYK		1.13e-10	3	730.049	3	730.049	55.04	3.58691	-0.632361	-0.632361	supercont2.1,+:19514-19570	exon1
								ANP00038	FVSINLCPPVIGQCLLECMVHPPVEGEESYELYQK	C7(Carboxymethyl); C14(Carboxymethyl); C18(Carboxymethyl)	8.43e-10	4	1035.23	4	1035.23	51.71	4.43498	2.71979	-0.867181	supercont2.1,+:19571-19675	exon1
								ANP00039	EYNTIADGLK		0.0022957	2	562.286	2	562.286	26.82	1.7469	1.00713	1.00713	supercont2.1,+:19676-19705	exon1
								ANP00040	AFALYEAFK		1.28e-05	2	530.277	2	530.277	47.92	2.64205	-3.44788	-3.44788	supercont2.1,+:19712-19738	exon1
								ANP00041	KMEGVECQEPQGAMYLFPTIHLPPK	C7(Carboxymethyl)	1.04e-13	3	967.807	3	967.807	40.65	4.91447	2.5561	2.5561	supercont2.1,+:19739-19867	exon1-2
								ANP00042	MEGVECQEPQGAMYLFPTIHLPPK	C6(Carboxymethyl)	1.19e-10	3	925.102	3	925.102	51.78	4.58022	-4.76495	-4.76495	supercont2.1,+:19742-19867	exon1-2
								ANP00043	KADEFYCLR	C7(Carboxymethyl)	0.000340489	2	601.78	2	601.78	31.84	2.88465	1.51075	1.51075	supercont2.1,+:19898-19924	exon2
								ANP00044	LLDATGVCVVPGSGFGQK	C8(Carboxymethyl)	3.17e-16	2	903.458	2	903.458	71.24	4.13291	-0.696552	-0.696552	supercont2.1,+:19925-19978	exon2
								ANP00045	TTFLAPGTEWVDR		1.97e-07	2	746.874	2	746.874	57.7	2.10021	-1.27673	-1.27673	supercont2.1,+:20000-20038	exon2
TERG_00008T0	501	54.8	8.32	Trichophyton_rubrum_CBS_118892_MFS_phospholipid_transporter_(502_aa)	3	0.1018	supercont2.1,+:29218-30986	ANP00087	LNEPEEFNR		0.00333343	2	574.274	2	574.274	30.35	2.42015	2.92591	2.92591	supercont2.1,+:29988-30014	exon2
								ANP00089	IGAFVGTYVFPIIK		0.000257099	2	762.949	2	762.949	17.41	2.18922	4.99711	4.99711	supercont2.1,+:30659-30700	exon5
								ANP00090	QYLQENGYDTSTMGTQAAVPVSHDQEKN		3.09e-05	3	1037.81	3	1037.81	51.06	2.88347	2.99506	2.99506	supercont2.1,+:30900-30983	exon6
TERG_00009T0	241	26.4	9.82	Trichophyton_rubrum_CBS_118892_peroxisomal_biogenesis_factor_(242_aa)	4	0.2448	supercont2.1,+:31411-32278	ANP00091	VADALAYHPTVAHYSR		4.56e-10	2	885.952			53.36		2.65655		supercont2.1,+:31414-31461	exon1
								ANP00094	FLAWYLLR		6.78e-06	2	541.313	2	541.313	41.8	2.22362	0.0762256	0.0762256	supercont2.1,+:31603-31626	exon2
								ANP00095	AQSTINPFEAMK		0.000119737	2	668.834	2	668.834	36.17	1.81096	3.63522	3.63522	supercont2.1,+:31636-31671	exon2
								ANP00098	AAAIALDSKPGVAGAPGSDPVLK		4.81e-16	2	1053.08	2	1053.08	73.27	5.55734	-1.29957	-2.58599	supercont2.1,+:31732-31800	exon2
TERG_00010T0	571	62	8.87	Trichophyton_rubrum_CBS_118892_amidase_(572_aa)	13	0.3327	supercont2.1,+:33757-35710	ANP00099	LIEATADQLQDGLTK		7.27e-12	2	808.427	2	808.427	97.16	5.24543	-3.82841	-3.82841	supercont2.1,+:33949-33993	exon1
								ANP00100	GCFTSVDLVK	C2(Carboxymethyl)	0.00115384	2	563.778	2	563.778	27.97	1.71387	3.63076	3.63076	supercont2.1,+:33994-34023	exon1
								ANP00101	AVTEINPDALTIAK		3.5e-06	2	728.403	2	728.403	70.54	3.40295	-4.71537	-4.71537	supercont2.1,+:34128-34169	exon2
								ANP00102	GPLHGLPIVIK		2.67e-07	3	381.912	3	381.912	37.14	3.6165	-4.1604	-4.1604	supercont2.1,+:34206-34290	exon2-3
								ANP00103	NNIFTDDR		0.00872946	2	497.734	2	497.734	23.15	1.71597	1.95748	1.83242	supercont2.1,+:34291-34314	exon3
								ANP00104	TSADATVATK		0.000204377	2	482.752	2	482.752	48.94	2.55938	1.42375	1.42375	supercont2.1,+:34411-34440	exon4
								ANP00106	SGASQWANFR		0.000204377	2	562.269	2	562.269	64.77	2.71388	3.00071	3.00071	supercont2.1,+:34474-34503	exon4
								ANP00108	SNIVGLKPTVGLTSR		1.57e-06	3	514.64	3	514.64	27.37	2.96052	3.40028	3.40028	supercont2.1,+:34751-34795	exon5
								ANP00109	DAAYLLQVIAGK		2.82e-07	2	631.359	2	631.359	38.56	3.5221	-3.81672	-3.81672	supercont2.1,+:34859-34894	exon5
								ANP00110	TVVDQFNQALEVMK		4.23e-16	2	811.418	2	811.418	70.31	3.70504	2.12219	2.12219	supercont2.1,+:35033-35074	exon5
								ANP00113	FGNEGGILGALR		6.56e-09	2	602.325	2	602.325	73.51	2.92492	-4.12088	-4.12088	supercont2.1,+:35375-35410	exon5
								ANP00115	LDAAVLPTDLSPYIPALIGSPIITVPMGVYPHGTK		2.32e-10	3	1206.33	3	1206.33	68.53	4.98878	-3.73074	1.86312	supercont2.1,+:35420-35524	exon5
								ANP00116	ELVTSGPGIPIGIGFMGDLWSEEK		1.02e-08	2	1266.64	2	1266.64	39.66	3.45984	-0.820593	0.441326	supercont2.1,+:35540-35611	exon5
TERG_00012T0	650	74.3	5.96	Trichophyton_rubrum_CBS_118892_hypothetical_protein_(651_aa)	6	0.1585	supercont2.1,+:37258-39285	ANP00117	FSDFNMLAESLVK		1.55e-08	2	750.872	2	750.872	70.12	3.54489	-1.87129	-1.87129	supercont2.1,+:37570-37608	exon2
								ANP00120	NLNIIFALTGTPDLLHR		2.72e-07	3	636.694	3	636.694	37.81	2.01716	-2.10744	-2.10744	supercont2.1,+:37690-37740	exon2
								ANP00121	KVCLDDTNLEDESFR	C3(Carboxymethyl)	4.23e-16	2	921.415	2	921.415	87.14	3.3261	0.577282	0.577282	supercont2.1,+:37753-37797	exon2
								ANP00123	KAPPSNQIPVPHQDLYR		1.19e-10	3	654.021	3	654.021	17	2.51238	4.44163	4.06453	supercont2.1,+:38365-38415	exon2
								ANP00124	IPGVQSADTLQATEFISTVSNTFSSAQAK		0.00111268	3	1000.17	3	1000.17	17.03	2.84484	2.89033	2.89033	supercont2.1,+:38548-38634	exon2
								ANP00125	CDHVFIDPAILR	C1(Carboxymethyl)	8.38e-06	3	486.245	3	486.245	30.02	3.22711	-3.71637	-3.71637	supercont2.1,+:38755-38790	exon2
TERG_00013T0	223	23.9	5.24	Trichophyton_rubrum_CBS_118892_ThiJ/PfpI_family_protein_(224_aa)	5	0.3901	supercont2.1,+:39979-40716	ANP00126	IGVLLTHSVQLLDLAAVDLFGMMSK		2.16e-07	3	891.159	3	891.159	56.78	2.41016	2.38398	2.38398	supercont2.1,+:40009-40083	exon1
								ANP00127	CTASIGIR	C1(Carboxymethyl)	0.000770721	2	439.723	2	439.723	25.52	1.6817	-1.39511	-1.39511	supercont2.1,+:40195-40218	exon1
								ANP00128	YVPDESVLAFAK		5.37e-05	2	669.85	2	669.85	24.68	2.04926	-1.3198	-1.3198	supercont2.1,+:40297-40332	exon1
								ANP00129	DGNVWTSGGVTNGNDLVAAYLR		6.57e-17	2	1140.05	2	1140.05	134.87	5.36691	0.355215	-2.45158	supercont2.1,+:40507-40638	exon1-2
								ANP00130	EHYPLPLVNTILSIADVGGR		1.79e-12	2	1082.59	2	1082.59	67.58	4.01053	-0.905039	-0.273258	supercont2.1,+:40639-40698	exon2
TERG_00015T0	566	60	8.62	Trichophyton_rubrum_CBS_118892_stromal_membrane-associated_protein_(567_aa)	2	0.0495	supercont2.1,-:42501-44514	ANP00133	LNPGHVPSEAK		0.00117968	2	574.808	2	574.808	29.08	1.88676	2.25142	2.25142	supercont2.1,-:43929-44024	exon3-4
								ANP00134	SVDLDSWTDEQLQSIMK		4.23e-16	2	997.976	2	997.976	111.28	3.95742	4.33592	3.16292	supercont2.1,-:44140-44190	exon2
TERG_00018T0	97	10.6	8.53	Trichophyton_rubrum_CBS_118892_hypothetical_protein_(98_aa)	3	0.4433	supercont2.1,-:49832-50673	ANP00136	DQEMIDNTSDVFSSLSTNIK		1.55e-13	2	1122.53	2	1122.53	129.5	5.70851	4.60875	4.60875	supercont2.1,-:50282-50415	exon2-3
								ANP00137	SVTVNIYDNAR		1.36e-05	2	626.321	2	626.321	45.62	2.50188	0.617163	0.716132	supercont2.1,-:50416-50448	exon2
								ANP00138	QNNSLLESLSQK		0.000352893	2	680.86	2	680.86	29.99	2.00041	4.44142	4.44142	supercont2.1,-:50464-50499	exon2
TERG_00019T0	634	70.9	5.96	Trichophyton_rubrum_CBS_118892_mitochondrial_GTPase_(635_aa)	2	0.0426	supercont2.1,-:51066-53031	ANP00141	SALLDAFLSR		8.35e-07	2	546.805	2	546.805	52.41	2.88061	-2.09847	-2.09847	supercont2.1,-:51630-51659	exon2
								ANP00143	FEVPSFSSAELSPAGYR		2.64e-11	2	922.447	2	922.447	77.77	3.03056	0.119839	0.119839	supercont2.1,-:52044-52094	exon2
TERG_00020T0	393	41.6	9.26	Trichophyton_rubrum_CBS_118892_SH3_domain-containing_protein_(394_aa)	9	0.2926	supercont2.1,+:53793-55128	ANP00146	PLGFNNPLPSSLASECR	C16(Carboxymethyl)	1.15e-12	2	930.449			81.07		-2.4131		supercont2.1,+:53796-53935	exon1-2
								ANP00147	ILVSFIDPSESFGPEK		1.03e-07	2	882.956	2	882.956	50.09	3.08387	-0.749157	-0.749157	supercont2.1,+:53948-53995	exon2
								ANP00148	GLAILTVVK		0.000104486	2	457.307	2	457.307	30.19	2.4461	-1.89818	-1.89818	supercont2.1,+:54094-54120	exon3
								ANP00150	NAEAAGAASMK		6.35e-08	1	1020.48	1	1020.48	67.86	2.07192	0.207682	0.207682	supercont2.1,+:54364-54396	exon3
								ANP00151	YGTTYAER		0.00136357	2	480.725	2	480.725	36.83	1.2828	-0.351624	-0.351624	supercont2.1,+:54610-54633	exon3
								ANP00152	AASTSDYQYSDRPQR		0.000485123	2	872.898	2	872.898	24.89	2.46446	0.529881	0.529881	supercont2.1,+:54703-54747	exon3
								ANP00153	HNTWQDNVHDR		1.99e-06	2	711.319	2	711.319	46.77	3.45582	-0.435314	-0.435314	supercont2.1,+:54748-54780	exon3
								ANP00154	ANPNETFDSFGQSQR		0.00105381	2	849.378	2	849.378	22.97	2.88242	-1.93769	-1.93769	supercont2.1,+:54823-54867	exon3
								ANP00156	VGIFPSNYVEAGK		3.51e-05	2	690.862	2	690.862	41.67	2.25198	-0.0773932	-0.0773932	supercont2.1,+:55087-55125	exon3
TERG_00023T0	628	69.1	7.18	Trichophyton_rubrum_CBS_118892_catabolite_repressor_protein_(629_aa)	8	0.2659	supercont2.1,+:64713-67345	ANP00159	EDVHLATPPPHPSEPPLINPNPLATGITPPTVGAK		0.000164995			4	894.477		2.8343		-1.04541	supercont2.1,+:65405-65509	exon3
								ANP00160	LSLAILKPTGSGAQLYK		3.53e-05	2	880.52	2	880.52	30.78	3.26856	0.667615	0.667615	supercont2.1,+:65510-65560	exon3
								ANP00161	SSSEPHVNASTQAPPFGEGSLALANSGGR		2.43e-07	3	942.452	3	942.452	30.2	3.90103	-0.788361	-0.788361	supercont2.1,+:65627-65713	exon3
								ANP00162	THDSPFVFANLNR		0.000406471	2	759.379	2	759.379	31.88	2.27127	1.10488	1.10488	supercont2.1,+:65828-65866	exon3
								ANP00163	SFQWLDYSVPNK		2.86e-05	2	742.366	2	742.366	52.08	2.82524	2.21723	2.21723	supercont2.1,+:65867-65902	exon3
								ANP00164	SFQWLDYSVPNKQEFLTK		0.000131228	2	1115.56	2	1115.56	23.61	2.67789	1.32238	1.32238	supercont2.1,+:65867-65920	exon3
								ANP00165	AVGEDPISWLGFLQDSIMTSSLEGHIR		5.83e-07	3	986.827	3	986.827	36.42	1.81162	0.552645	0.116902	supercont2.1,+:67029-67234	exon5-6
								ANP00166	TWDRPSETAGEPNASAAGSSVAVGSLPR		7.53e-11	3	924.118	3	924.118	33.54	3.5537	0.526725	0.526725	supercont2.1,+:67235-67318	exon6
TERG_00024T0	178	20.2	8.9	Trichophyton_rubrum_CBS_118892_ADP-ribosylation_factor_(179_aa)	8	0.6236	supercont2.1,-:67816-68700	ANP00167	IWYVVPTCATTGEGLFEGLDHLK	C8(Carboxymethyl)	6.71e-08	2	1304.14	2	1304.14	94.56	4.24847	-0.571976	-0.571976	supercont2.1,-:67831-67966	exon4-5
								ANP00170	QDIPGAMSPQEVTEK		4.86e-08	2	815.394	2	815.394	67.58	3.28662	1.30425	1.07704	supercont2.1,-:67994-68128	exon3-4
								ANP00171	EALLLVFANK		1.54e-07	2	559.334	2	559.334	84.46	3.37458	-0.743162	-0.743162	supercont2.1,-:68129-68158	exon3
								ANP00172	HYFSGTQGLIFVIDSNDR		1.95e-06	3	690.342	3	690.342	52.1	2.99047	-1.92865	1.19543	supercont2.1,-:68219-68333	exon2-3
								ANP00173	FNVWDVGGQDK		1.35e-05	2	632.8	2	632.8	35.13	1.96647	-2.44098	-2.44098	supercont2.1,-:68352-68384	exon2
								ANP00174	LNQDVTTIPTVGFNVETVTYK		3.13e-12	2	1170.11	2	1170.11	88.85	4.61356	-1.60451	-1.49936	supercont2.1,-:68394-68456	exon2
								ANP00175	LKLNQDVTTIPTVGFNVETVTYK		1.18e-05	3	860.802	3	860.802	21.21	2.45977	0.0560773	0.0560773	supercont2.1,-:68394-68462	exon2
								ANP00176	LLMLGLDAAGK		3.39e-07	2	551.319	2	551.319	51.03	3.25224	-3.49855	-3.49855	supercont2.1,-:68611-68643	exon1
TERG_00028T0	851	92.9	5.96	Trichophyton_rubrum_CBS_118892_hypothetical_protein_(852_aa)	13	0.2808	supercont2.1,-:76090-78906	ANP00179	VYVDFTQLTK		0.000576301	2	607.328	2	607.328	25.88	2.44841	2.09125	2.09125	supercont2.1,-:76123-76152	exon5
								ANP00180	SLEHLADLAVGAGGAAAAAAAAAAAAAAGTNTENQTAR		1.6e-09	3	1126.23	3	1126.23	63.49	3.78809	0.537846	0.537846	supercont2.1,-:76249-76362	exon5
								ANP00181	STQQGSGAVGSSEQR		0.000153094	2	739.847	2	739.847	38.15	1.99971	2.82809	2.82809	supercont2.1,-:76363-76407	exon5
								ANP00182	HASTVEEFSNIFYTR		3.4e-09	2	900.93	2	900.93	78.57	3.28916	-1.46084	-1.46084	supercont2.1,-:76462-76506	exon5
								ANP00183	QLYTSVPAEVLYPAQVILELLMQHSGPDK		1.27e-05	3	1080.58	3	1080.58	38.15	2.6508	4.56132	4.56132	supercont2.1,-:76648-76734	exon5
								ANP00184	YSTSVSEIIEVLFDNTVHPSFGR		7.15e-06	3	866.436	3	866.436	52.9	2.2475	1.53845	1.53845	supercont2.1,-:76897-76965	exon5
								ANP00185	GILSFASLQLAR		3.32e-07	2	638.375	2	638.375	55.58	3.12069	0.275008	0.275008	supercont2.1,-:77031-77066	exon4
								ANP00186	DVFGVFEAAMPEDR		8.19e-06	2	791.863	2	791.863	63.85	2.1262	-1.38539	-1.38539	supercont2.1,-:77067-77108	exon4
								ANP00187	TVLVDAAFPIAHHLAR		1.13e-08	4	433.496	4	433.496	22.42	2.20853	-3.64451	-3.64451	supercont2.1,-:77238-77285	exon4
								ANP00188	QIQETFLHSLLSVTGANLSR		2.74e-11	2	1107.6	2	1107.6	88	3.77469	-1.88926	-1.88926	supercont2.1,-:77478-77537	exon4
								ANP00189	DLLFQYLK		1.51e-05	2	520.296	2	520.296	27.7	2.11426	1.94323	1.94323	supercont2.1,-:77550-77573	exon4
								ANP00190	DAAHAADLAALDEYGTVQNGSTR		0.000387856	3	782.705	3	782.705	23.93	1.40233	1.79833	1.79833	supercont2.1,-:77809-77877	exon3
								ANP00191	GYQDFSPSIDNQGLTR		9.4e-08	2	899.421	2	899.421	41.11	3.15152	-3.168	-3.168	supercont2.1,-:77992-78039	exon3
TERG_00032T0	333	35.3	10.32	Trichophyton_rubrum_CBS_118892_mitochondrial_dicarboxylate_carrier_(334_aa)	4	0.1652	supercont2.1,+:91473-92529	ANP00195	AGPKPSAIGVAR		0.000403702	2	562.334	2	562.334	35.14	2.19388	2.83452	2.83452	supercont2.1,+:91710-91745	exon1
								ANP00197	ANYTSVVDALVR		3.32e-06	2	654.35	2	654.35	47.91	2.0572	-2.5242	-2.5242	supercont2.1,+:92022-92057	exon1
								ANP00198	TEGISALWAGAFPTVVR		2.16e-10	2	887.978	2	887.978	63.9	4.85387	0.0209251	0.0209251	supercont2.1,+:92067-92117	exon1
								ANP00199	SQLQTHTNLSAQNR		0.000182373	2	799.407	2	799.407	39.35	2.53291	1.06507	1.06507	supercont2.1,+:92166-92207	exon1
TERG_00034T0	554	63	8.69	Trichophyton_rubrum_CBS_118892_mRNA_cap_methyltransferase_(555_aa)	2	0.0523	supercont2.1,-:95072-96845	ANP00200	FIGVGPNSDVISAK		2.71e-07	2	702.378	2	702.378	39.25	3.07341	-0.443355	-3.79084	supercont2.1,-:95643-95684	exon1
								ANP00201	DCFGESLADVPIIQR	C2(Carboxymethyl)	3.39e-08	2	860.911	2	860.911	41.66	2.23947	-3.59714	-3.59714	supercont2.1,-:95859-95903	exon1
TERG_00035T0	437	49.1	8.19	Trichophyton_rubrum_CBS_118892_hypothetical_protein_(438_aa)	1	0.0275	supercont2.1,-:97229-98663	ANP00204	LPPIDVLILPEK		5.98e-09	2	673.921	2	673.921	43.42	2.69854	3.45452	3.45452	supercont2.1,-:97820-97855	exon3
TERG_00051T0	548	59.8	5.45	Trichophyton_rubrum_CBS_118892_chaperonin_containing_TCP1_(549_aa)	29	0.6624	supercont2.1,-:138776-141111	ANP00214	VNNVIIAGEDNDEF		0.00809384	2	774.862	2	774.862	18.64	1.25355	-0.891825	-0.891825	supercont2.1,-:138779-138820	exon11
								ANP00215	EQLLLATQLCR	C10(Carboxymethyl)	1.06e-06	2	673.36	2	673.36	61.16	2.77578	-1.59136	-1.59136	supercont2.1,-:138921-138953	exon10
								ANP00216	LGVDCMQTGSNDMRDHFVIDPLIGKR	C5(Carboxymethyl)	3.21e-06	4	744.613	4	744.613	10.22	3.22889	4.88499	4.88499	supercont2.1,-:138954-139095	exon9-10
								ANP00217	DHFVIDPLIGK		2.4e-12	2	627.348	2	627.348	45.45	3.50028	-0.842873	-0.510909	supercont2.1,-:138957-138989	exon10
								ANP00218	LGVDCMQTGSNDMR	C5(Carboxymethyl)	3.22e-09	2	792.827	2	792.827	84.35	3.66759	0.653182	0.653182	supercont2.1,-:138990-139095	exon9-10
								ANP00219	AFADALDAIPLALAENSGWSPIETLASIK		2.01e-10	2	1492.78	2	1492.78	46.74	3.85996	-2.01491	-2.01491	supercont2.1,-:139126-139212	exon9
								ANP00222	MLVIEDCANTR	C7(Carboxymethyl)	7.44e-07	2	661.807	2	661.807	29.9	2.05331	-1.67487	-1.67487	supercont2.1,-:139546-139578	exon7
								ANP00224	LGTAGVVR		0.000811991	2	386.737	2	386.737	37.57	2.04291	-0.693272	-0.693272	supercont2.1,-:139609-139632	exon7
								ANP00225	FEDLSAEK		0.000522578	1	938.447	1	938.447	40.62	1.87694	0.854733	0.854733	supercont2.1,-:139633-139656	exon7
								ANP00226	WVGGPEIELIAIATNGR		4.45e-10	2	898.488	2	898.488	54.65	4.03671	-0.451787	-0.451787	supercont2.1,-:139669-139719	exon7
								ANP00227	DTGANLVICQWGFDDEANHLLLQNDLPAVR	C9(Carboxymethyl)	2.41e-13	3	1132.55	3	1132.55	71.81	4.20866	0.448109	0.448109	supercont2.1,-:139720-139809	exon7
								ANP00231	LDITSVEEFKK		0.00632737	2	654.856	2	654.856	15.81	2.45214	0.201674	0.201674	supercont2.1,-:139861-139893	exon7
								ANP00232	HKLDITSVEEFKK		9.61e-07	3	525.291	3	525.291	33.45	4.99447	-0.711036	-0.711036	supercont2.1,-:139861-139899	exon7
								ANP00233	LDITSVEEFK		1.11e-05	2	590.807	2	590.807	44.69	2.74088	-2.40206	-2.40206	supercont2.1,-:139864-139893	exon7
								ANP00234	HKLDITSVEEFK		3.62e-07	3	482.592	3	482.592	28.17	3.69309	-0.860876	-0.860876	supercont2.1,-:139864-139899	exon7
								ANP00235	IAILTCAFEPPKPK	C6(Carboxymethyl)	1.72e-14	2	793.44	2	793.44	35.26	3.70985	4.11095	4.11095	supercont2.1,-:139906-139947	exon7
								ANP00236	DFSHPQMPDEVK		0.000532448	3	477.219	3	477.219	22.74	1.84789	-2.03305	0.119412	supercont2.1,-:139957-139992	exon7
								ANP00237	GVIVDKDFSHPQMPDEVK		0.00124283	3	681.007	3	681.007	18.69	2.37386	0.15295	0.15295	supercont2.1,-:139957-140010	exon7
								ANP00238	VGGSLEDSLLVK		1.04e-06	2	608.842	2	608.842	55.15	2.7894	-1.44174	-1.44174	supercont2.1,-:140011-140046	exon7
								ANP00239	DVDFELIKVDGK		7.18e-05	2	689.37	2	689.37	54.77	3.12873	4.86303	4.86303	supercont2.1,-:140047-140082	exon7
								ANP00241	IAVDAVLSVADLER		6.54e-10	2	735.91	2	735.91	70.75	3.34925	-2.84959	-2.84959	supercont2.1,-:140086-140127	exon7
								ANP00242	DEQENLFK		0.00205016	2	511.744	2	511.744	37.74	2.36977	1.24477	1.24477	supercont2.1,-:140262-140285	exon6
								ANP00243	IADGYDQACDIAVAHLDSISDKVEFSR	C9(Carboxymethyl)	8.62e-09	4	749.856	4	749.856	43.66	3.83468	3.20635	3.20635	supercont2.1,-:140286-140366	exon6
								ANP00244	IADGYDQACDIAVAHLDSISDK	C9(Carboxymethyl)	3.7e-12	3	793.362	3	793.362	73.52	4.69572	-3.83911	-4.39575	supercont2.1,-:140301-140366	exon6
								ANP00245	SQDEEIGDGTTGVVVLAGALLEQAADLIDK		1.41e-14	3	1009.85	3	1009.85	71.66	5.98566	1.6489	1.6489	supercont2.1,-:140385-140474	exon6
								ANP00246	LLVELSK		0.00651269	2	401.258	2	401.258	24.43	2.17608	0.665578	0.665578	supercont2.1,-:140475-140495	exon6
								ANP00247	ILISPDGDITITNDGATILSQMEISNHVAK		6.4e-11	3	1056.21	3	1056.21	62.95	3.91092	-3.78178	-3.78178	supercont2.1,-:140496-140646	exon5-6
								ANP00249	AMQLDMSQASVVKDEQGRPFIVVR	N-Term(Acetyl)	1.19e-06	3	916.139			61.59		0.684813		supercont2.1,-:140904-141108	exon1-3
								ANP00250	AMQLDMSQASVVK	N-Term(Acetyl)	0.00142946	2	725.359			28.73		2.54227		supercont2.1,-:140937-141108	exon1-3
TERG_00052T0	227	25.8	4.73	Trichophyton_rubrum_CBS_118892_hypothetical_protein_(228_aa)	5	0.4361	supercont2.1,+:141529-142566	ANP00252	EDEETKPIKDDEKDDQNGEEDEEDEAEDDDEDVYVVER		4.31e-06	3	1505.61	3	1505.61	41.09	4.92305	0.207941	0.207941	supercont2.1,+:141649-141823	exon2-3
								ANP00253	GYDDPSDMTVEPEENLLDGAQEALEEYFK		5.75e-07	2	1652.72	2	1652.72	44.02	3.22561	0.292662	0.292662	supercont2.1,+:141945-142093	exon4-5
								ANP00255	DPDGDGLVAYLEWK		1.43e-08	2	789.382	2	789.382	75.58	3.4983	4.96063	4.96063	supercont2.1,+:142310-142351	exon5
								ANP00256	APIQTCYER	C6(Carboxymethyl)	0.000730344	2	569.764	2	569.764	17.43	1.83164	0.049604	0.049604	supercont2.1,+:142370-142396	exon5
								ANP00257	FYEQHLVFK		0.000299106	2	605.817	2	605.817	34.86	2.2185	1.11315	1.11315	supercont2.1,+:142473-142557	exon6-7
TERG_00055T0	940	104.7	5.06	Trichophyton_rubrum_CBS_118892_hypothetical_protein_(941_aa)	2	0.0415	supercont2.1,+:146760-149705	ANP00259	QNLGFSPAIWQGLTDVLTK		9.75e-10	2	1044.56	2	1044.56	78.99	3.51712	3.34269	3.34269	supercont2.1,+:147096-147152	exon2
								ANP00260	TLYDQTAEDLLLETISSFPR		1.13e-07	2	1156.58	2	1156.58	52.36	3.88802	-2.72354	-2.72354	supercont2.1,+:147690-147749	exon2
TERG_00057T0	233	26.3	4.88	Trichophyton_rubrum_CBS_118892_hypothetical_protein_(234_aa)	3	0.2747	supercont2.1,-:151725-152608	ANP00264	ESQTCPICNNPFLEDSHPLVVR	C5(Carboxymethyl); C8(Carboxymethyl)	5.94e-05	3	872.066	3	872.066	19.93	1.72916	-3.125	-3.125	supercont2.1,-:151929-151994	exon3
								ANP00265	DPEIPDAGQGQLIEEMIR		1.4e-12	2	1005.99	2	1005.99	76.83	3.82497	-0.760543	-0.760543	supercont2.1,-:152152-152205	exon2
								ANP00266	SARPDLSTFFATLNEISPNQGNER		0.00141639			3	888.772		2.42747		-0.133281	supercont2.1,-:152329-152400	exon2
TERG_00058T0	628	68.7	6.86	Trichophyton_rubrum_CBS_118892_oxidoreductase_(629_aa)	1	0.0287	supercont2.1,-:153112-155064	ANP00268	LISNSPHLPQEALDLLGR		4.25e-08	3	658.363	3	658.363	27.83	2.48557	-4.13303	-4.13303	supercont2.1,-:154363-154416	exon2
TERG_00060T0	160	17.1	5.08	Trichophyton_rubrum_CBS_118892_BYS1_domain-containing_protein_(161_aa)	3	0.2	supercont2.1,+:159015-159497	ANP00269	YDPVSGGIALK		0.00106223	2	560.307	2	560.307	51.82	2.05475	2.58405	1.25408	supercont2.1,+:159195-159227	exon1
								ANP00270	FTSACQR	C5(Carboxymethyl)	0.00639771	2	435.693	2	435.694	35.85	1.87035	3.26529	2.2658	supercont2.1,+:159432-159452	exon1
								ANP00271	DADITLTLCAQPPK	C9(Carboxymethyl)	4.85e-09	2	772.39	2	772.388	61.89	3.12543	0.713889	3.12569	supercont2.1,+:159453-159494	exon1
TERG_00061T0	436	47.8	7.21	Trichophyton_rubrum_CBS_118892_GDP-mannose_pyrophosphorylase_(437_aa)	21	0.6628	supercont2.1,-:160258-161791	ANP00272	VQNCVCLPFK	C4(Carboxymethyl); C6(Carboxymethyl)	5.93e-07	2	633.796	2	633.796	36.66	2.50318	-1.30979	-1.30979	supercont2.1,-:160350-160379	exon3
								ANP00273	ECGVGDEVR	C2(Carboxymethyl)	4.8e-05	2	511.218	2	511.218	46	2.07229	3.06157	3.06157	supercont2.1,-:160380-160406	exon3
								ANP00274	VQNITILGKECGVGDEVR	C11(Carboxymethyl)	4.52e-12	2	994.51	2	994.51	60.91	4.19871	0.546313	0.546313	supercont2.1,-:160380-160433	exon3
								ANP00275	VQNITILGK		6.69e-06	2	493.307	2	493.306	52.19	2.85498	1.14742	2.47251	supercont2.1,-:160407-160433	exon3
								ANP00277	VEGTPTPAGSHSTTIIK		2.59e-09	2	848.448	2	848.448	71.89	2.93229	-0.932865	-0.932865	supercont2.1,-:160446-160496	exon3
								ANP00279	HDACILYSIIGWSSR	C4(Carboxymethyl)	2.53e-10	2	889.93	2	889.93	77.59	4.05131	-0.654107	-0.654107	supercont2.1,-:160515-160559	exon3
								ANP00280	ESIVLEDAEIK		8.82e-06	2	623.332	2	623.332	39.25	1.94222	-0.850273	-0.850273	supercont2.1,-:160560-160592	exon3
								ANP00281	IKESIVLEDAEIK		5.84e-09	2	743.922	2	743.922	66.31	4.31657	-0.269728	-0.269728	supercont2.1,-:160560-160598	exon3
								ANP00283	LGPNVSIGAR		1.81e-07	2	492.286	2	492.286	74.64	2.93105	1.29553	1.29553	supercont2.1,-:160623-160652	exon3
								ANP00284	AFQSGSEELAAPSASIVPPVYIHPSATVDPTAK		6.93e-13	3	1113.24	3	1113.24	57.47	3.54075	-0.455489	-0.455489	supercont2.1,-:160653-160751	exon3
								ANP00285	TAGSAVPANALYLQK		1.29e-06	2	752.412	2	752.412	65	2.50905	0.291358	0.291358	supercont2.1,-:160752-160796	exon3
								ANP00286	FFVHETK		0.00906386	2	454.239	2	454.239	20.84	2.01153	4.19959	4.19959	supercont2.1,-:160818-160838	exon3
								ANP00287	LEQDILPDLADSNR		1.52e-08	2	799.903	2	799.903	46.31	3.58303	-1.66694	-1.66694	supercont2.1,-:160839-160880	exon3
								ANP00288	LLSYPSSENLESSYVAQDDSAEMPEVLR		8.16e-10	3	1043.82	2	1565.23	60.72	3.88188	-0.364061	-3.99613	supercont2.1,-:160881-160964	exon3
								ANP00289	VSDDAATNFGCIVSDTHTK	C11(Carboxymethyl)	4.23e-16	2	1019.96	2	1019.96	77.92	3.77103	5.14017	5.14017	supercont2.1,-:161100-161156	exon3
								ANP00290	DAEAVILGTR		5.32e-06	2	522.788	2	522.788	62.52	2.76766	0.660757	0.660757	supercont2.1,-:161157-161186	exon3
								ANP00291	FFVLNADVCCSFPLGEMLK	C9(Carboxymethyl); C10(Carboxymethyl)	4.68e-11	2	1125.02	2	1125.02	80.59	4.40071	0.776166	0.776166	supercont2.1,-:161202-161258	exon3
								ANP00292	EYQALGTAGGLYHFR		4.23e-16	2	841.92	2	841.92	79.28	3.41978	2.6873	2.6873	supercont2.1,-:161289-161333	exon3
								ANP00293	SASVEFPQFR		0.000105904	2	584.294	2	584.294	30.5	2.17794	1.09868	1.09868	supercont2.1,-:161349-161378	exon3
								ANP00295	FRPLSLDMPKPLFEVAGHPIILHCLK	C24(Carboxymethyl)	2.42e-10	5	606.738	5	606.738	50.01	3.90451	4.80173	4.80173	supercont2.1,-:161460-161607	exon2-3
								ANP00296	AVILVGGPSR		5.4e-05	2	484.798	2	484.798	41.98	3.18998	-0.844041	-0.844041	supercont2.1,-:161617-161746	exon1-2
TERG_00063T0	609	69.5	6.06	Trichophyton_rubrum_CBS_118892_lysyl-tRNA_synthetase_(610_aa)	30	0.5993	supercont2.1,+:165988-167982	ANP00299	ADQAAVDQAGASVANLQLDEVTGER	N-Term(Acetyl)	2.3e-16	3	857.414			73.93		-2.50835		supercont2.1,+:165991-166065	exon1
								ANP00300	AAAAAAAAPAEGK		3.63e-05	2	535.287	2	535.287	59.57	3.31919	2.58997	2.58997	supercont2.1,+:166132-166170	exon1
								ANP00301	NKEEDESQLTPNQYFEIR		2.98e-16	2	1120.52	2	1120.52	103.33	5.49751	-2.40908	-2.40908	supercont2.1,+:166177-166304	exon1-2
								ANP00302	EEDESQLTPNQYFEIR		2.52e-05	2	999.457	2	999.457	38	3.47297	-1.12093	-1.12093	supercont2.1,+:166183-166304	exon1-2
								ANP00303	FQVTDDLR		0.000216407	2	497.253	2	497.253	31.16	1.92774	-1.23512	-1.23512	supercont2.1,+:166362-166385	exon2
								ANP00304	LIFYDLR		5.56e-06	2	470.268	2	470.268	31.56	2.27667	-1.28971	-1.28971	supercont2.1,+:166491-166511	exon2
								ANP00305	VQVACQAQEATGDMPFEAQHEQLR	C5(Carboxymethyl)	9.09e-15	2	1372.62	3	915.416	103.52	4.54289	-2.32103	-1.14961	supercont2.1,+:166527-166598	exon2
								ANP00306	RGDIVGIVGFPGR		1.02e-05	2	671.884	2	671.884	48.17	3.21531	1.38189	1.38189	supercont2.1,+:166599-166637	exon2
								ANP00307	GDIVGIVGFPGR		4.23e-16	2	593.835	2	593.835	32.8	2.69417	4.42647	4.42647	supercont2.1,+:166602-166637	exon2
								ANP00308	NRDDGELSIFAR		1.01e-05	2	696.845	2	696.845	46.08	3.03339	-2.30758	-2.30758	supercont2.1,+:166650-166685	exon2
								ANP00309	DDGELSIFAR		0.000196896	2	561.776	2	561.776	17.83	1.93694	1.33448	1.33448	supercont2.1,+:166656-166685	exon2
								ANP00310	QVILLSPCLHQIPSEHYGLK	C8(Carboxymethyl)	4.23e-16	2	1167.12	2	1167.12	59.95	3.81623	2.02575	2.02575	supercont2.1,+:166686-166745	exon2
								ANP00311	YLDLIMNDSSR		4.21e-07	2	663.821	2	663.821	49.96	2.31617	-1.65567	-1.65567	supercont2.1,+:166773-166805	exon2
								ANP00313	MLIVGGLER		1.11e-06	2	494.287	2	494.287	37.41	2.26114	0.722642	0.722642	supercont2.1,+:166998-167024	exon2
								ANP00315	NEGIDLTHNPEFTTCEFYWAYADVYDLMNVTEDLVSGLVK	C15(Carboxymethyl)	4.53e-16	3	1557.38	3	1557.38	67.9	4.87175	-0.913475	-0.913475	supercont2.1,+:167052-167171	exon2
								ANP00316	HVTGGYETVFHTQSGEQYNVNWK		1.64e-09	2	1341.12	2	1341.12	59.64	4.9088	-1.42389	-1.42389	supercont2.1,+:167172-167240	exon2
								ANP00317	KIEMIPALEEATGEK		1.26e-07	2	829.935	3	553.627	48.98	4.07315	-1.12357	-3.01223	supercont2.1,+:167253-167297	exon2
								ANP00318	KIEMIPALEEATGEKFPPGDQLHTEETNGFLK		8.09e-07	4	893.203	4	893.203	42.77	4.39057	1.90549	1.90549	supercont2.1,+:167253-167348	exon2
								ANP00319	IEMIPALEEATGEK		0.000120239	2	765.891	2	765.889	31.89	2.01842	-0.927942	1.25069	supercont2.1,+:167256-167297	exon2
								ANP00320	IEMIPALEEATGEKFPPGDQLHTEETNGFLK		7.02e-07	3	1147.9	3	1147.9	40.9	4.1659	-5.02297	-5.02297	supercont2.1,+:167256-167348	exon2
								ANP00321	FPPGDQLHTEETNGFLK		1.31e-13	2	965.474	2	965.466	70.97	3.92976	-4.82545	3.72906	supercont2.1,+:167298-167348	exon2
								ANP00322	KVNVECTPPLTNAR	C6(Carboxymethyl)	1.18e-07	2	800.414	2	800.414	43.25	2.9499	3.74895	3.74895	supercont2.1,+:167361-167402	exon2
								ANP00323	VNVECTPPLTNAR	C5(Carboxymethyl)	1.02e-05	2	736.366	2	736.366	35.55	2.57026	2.78079	2.78079	supercont2.1,+:167364-167402	exon2
								ANP00324	LVGEFIEEK		0.000541527	2	532.289	2	532.289	30.7	2.32871	4.44051	4.44051	supercont2.1,+:167415-167441	exon2
								ANP00325	CINPSFIIGHPQMMSPLAK	C1(Carboxymethyl)	1.02e-12	2	1071.53	2	1071.53	62.93	4.73978	-0.62422	-0.62422	supercont2.1,+:167442-167498	exon2
								ANP00327	EIVNAYTELNDPFDQR		4.23e-16	2	962.461	2	962.461	89.7	3.6071	2.81858	2.81858	supercont2.1,+:167556-167603	exon2
								ANP00328	LRFEEQAR		0.00436542	2	524.783	2	524.783	23.26	1.79301	4.90009	4.90009	supercont2.1,+:167604-167627	exon2
								ANP00330	LVMFLTDNYSIK		4.59e-07	2	722.38	2	722.38	51.08	3.27543	-1.60881	-1.60881	supercont2.1,+:167736-167771	exon2
								ANP00331	EVLAFPFMK		0.000380015	2	541.291	2	541.291	26.71	2.25742	-0.239414	-0.239414	supercont2.1,+:167772-167798	exon2
								ANP00332	DKDHLAAEVAGVEPTPVEGIPHK		4.59e-13	2	1205.12	2	1205.12	90.51	5.71534	-4.07349	0.622129	supercont2.1,+:167820-167979	exon2-3
TERG_00065T0	499	55.3	10.39	Trichophyton_rubrum_CBS_118892_cytochrome_c_oxidase_assembly_protein_(500_aa)	17	0.3788	supercont2.1,-:171141-172700	ANP00334	AKPLSSTSHAASPLAK		5.39e-09	2	783.437	2	783.437	68.71	4.22385	0.722895	0.722895	supercont2.1,-:171150-171197	exon2
								ANP00335	LLQQTVK		0.00352346	2	415.262	2	415.262	27.81	2.18647	2.85537	2.85537	supercont2.1,-:171198-171218	exon2
								ANP00337	NMLENPSFVQLDHR		4.93e-16	2	850.416	2	850.416	66.58	3.20607	1.1183	1.1183	supercont2.1,-:171489-171530	exon2
								ANP00339	EELFDEFYSR		6.64e-06	2	667.797	2	667.797	36.26	2.79152	-1.8225	-2.74975	supercont2.1,-:171561-171590	exon2
								ANP00340	GLEVLQALKNPK		4.46e-05	2	655.398	2	655.398	38.64	3.54285	3.57554	3.57554	supercont2.1,-:171735-171770	exon2
								ANP00342	GLEVLQALK		4.39e-06	2	485.8	2	485.799	63.6	3.1189	-1.88402	-1.56354	supercont2.1,-:171744-171770	exon2
								ANP00343	LLADPVKGLEVLQALK		1.52e-05	3	569.685	3	569.685	39	2.90792	-0.784341	-0.784341	supercont2.1,-:171744-171791	exon2
								ANP00344	LLADPVK		0.00316055	2	378.237	2	378.237	30.55	1.79944	1.85284	1.85284	supercont2.1,-:171771-171791	exon2
								ANP00345	DDLFAPGSHPR		8.02e-05	2	606.296	2	606.296	35.7	2.51153	3.33254	3.33254	supercont2.1,-:171888-171920	exon2
								ANP00346	SGLKDDLFAPGSHPR		9.27e-07	2	798.912	2	798.912	77.07	4.01818	2.21204	2.21204	supercont2.1,-:171888-171932	exon2
								ANP00348	FVGLSFVIPAAYFVATK		2.3e-11	2	915.515	2	915.515	67.75	4.44656	1.79969	1.79969	supercont2.1,-:172020-172070	exon2
								ANP00349	SIYYMEWIHR		0.000242307	2	699.335	2	699.335	40.55	2.11868	-3.76063	-3.76063	supercont2.1,-:172083-172112	exon2
								ANP00350	LLNPNMTLQEFK	M6(Oxidation)	2.11e-06	2	732.38	2	732.38	26.88	2.13844	-2.95387	-2.95387	supercont2.1,-:172113-172148	exon2
								ANP00351	LTESGLSITEWRPVTGSIPPLNEDDWESEFAK		4.23e-16	3	1201.93	3	1201.93	40.57	3.75302	3.60648	3.60648	supercont2.1,-:172173-172328	exon1-2
								ANP00354	SFFTTAATPAAGEAVSK		1.56e-06	2	828.417	2	828.418	55.9	3.69399	0.491763	-0.626192	supercont2.1,-:172428-172478	exon1
								ANP00355	VQSSKPVVPR		1.64e-05	2	548.828	2	548.828	30.59	2.4864	1.14614	1.14614	supercont2.1,-:172479-172508	exon1
								ANP00356	YTSGLLAAFR		2.02e-05	2	549.801	2	549.801	37.82	2.60717	-0.203223	-0.203223	supercont2.1,-:172509-172538	exon1
TERG_00066T0	401	45.3	5.85	Trichophyton_rubrum_CBS_118892_4-hydroxyphenylpyruvate_dioxygenase_(402_aa)	36	0.8429	supercont2.1,-:173437-174833	ANP00357	ALFEAIER		4.85e-05	2	474.762	2	474.762	63.16	2.63714	2.86448	2.86448	supercont2.1,-:173467-173490	exon4
								ANP00358	NFSGFGAGNFR		1.47e-08	2	587.275	2	587.275	51.15	2.59824	-1.06924	-1.06924	supercont2.1,-:173491-173523	exon4
								ANP00359	HLMDRPTVFIEIIQR		3.32e-09	3	623.343	3	623.343	32.57	3.20748	-4.30921	-4.30921	supercont2.1,-:173527-173571	exon4
								ANP00360	LDILIDFDEGGYLLQLFTK		3.8e-10	2	1107.09	2	1107.09	86.58	5.07507	-3.44269	-3.44269	supercont2.1,-:173635-173691	exon3
								ANP00361	KLDILIDFDEGGYLLQLFTK		8.46e-05	3	781.096	3	781.096	29.34	3.58863	2.2042	2.2042	supercont2.1,-:173635-173694	exon3
								ANP00362	QGMVLEEDFEALKK		4.12e-09	2	818.918	2	818.918	54.59	3.98296	1.84767	1.84767	supercont2.1,-:173692-173733	exon3
								ANP00363	KQGMVLEEDFEALKK		9.79e-05	2	882.964	2	882.964	59.31	4.03199	0.0356661	0.0356661	supercont2.1,-:173692-173736	exon3
								ANP00364	QGMVLEEDFEALK		4.23e-16	2	754.872	2	754.872	64.77	2.77903	3.97132	3.97132	supercont2.1,-:173695-173733	exon3
								ANP00365	KQGMVLEEDFEALK		5.45e-08	2	818.914	2	818.914	65.34	3.36251	-2.90256	-2.90256	supercont2.1,-:173695-173736	exon3
								ANP00366	VPETYYDDMR		5.47e-07	2	644.781	2	644.781	70.66	2.75824	3.72202	3.43377	supercont2.1,-:173749-173778	exon3
								ANP00367	GLEFIKVPETYYDDMR		8.54e-07	2	988.475	2	988.475	48.84	3.28007	-1.93341	-1.93341	supercont2.1,-:173749-173796	exon3
								ANP00369	TENIIDTITQLK		4.23e-16	2	694.888	2	694.888	76.42	4.05233	3.94761	3.94761	supercont2.1,-:173803-173838	exon3
								ANP00370	QSQIEEYVDFYSGAGVQHIALR		3.82e-16	3	837.416	3	837.416	66.57	3.8315	0.661873	0.661873	supercont2.1,-:173839-173904	exon3
								ANP00371	KQSQIEEYVDFYSGAGVQHIALR		7.33e-11	3	880.111	3	880.111	63.16	5.82104	-2.39756	-2.39756	supercont2.1,-:173839-173907	exon3
								ANP00372	MPINEPAQGKK		0.000102083	2	606.826	2	606.826	46.19	2.98694	3.03175	3.03175	supercont2.1,-:173905-173937	exon3
								ANP00373	MPINEPAQGK		1.14e-06	1	1084.55	1	1084.55	52.07	2.24556	1.97717	1.97717	supercont2.1,-:173908-173937	exon3
								ANP00374	SIVMSSPNDIVK		2.44e-07	2	645.34	2	645.34	44.99	2.7495	-2.86552	-2.86552	supercont2.1,-:173938-173973	exon3
								ANP00375	DICTEFSALK	C3(Carboxymethyl)	2.48e-06	2	592.778	2	592.778	51.45	2.33021	-1.61384	-1.61384	supercont2.1,-:173974-174061	exon2-3
								ANP00376	FWSVDDKDICTEFSALK	C10(Carboxymethyl)	1.19e-10	2	1031.48	2	1031.48	75.39	4.18327	2.98859	2.98859	supercont2.1,-:173974-174082	exon2-3
								ANP00377	FWSVDDK		0.00152834	2	448.711	1	896.415	40.03	1.87682	0.156914	-0.345007	supercont2.1,-:174062-174082	exon2
								ANP00379	VCDYYEK	C2(Carboxymethyl)	0.00909129	1	977.393	1	977.393	22.35	1.73471	0.812377	0.812377	supercont2.1,-:174101-174191	exon1-2
								ANP00380	IDHCVGNQDWNEMEKVCDYYEK	C4(Carboxymethyl); C17(Carboxymethyl)	1.65e-07	3	945.382	3	945.382	45.34	3.70449	-1.98333	-1.98333	supercont2.1,-:174101-174236	exon1-2
								ANP00381	IDHCVGNQDWNEMEK	C4(Carboxymethyl)	2.36e-11	2	938.387	2	938.387	66.32	4.17684	1.22588	1.22588	supercont2.1,-:174192-174236	exon1
								ANP00382	DETAAPDPITQFLPEVK		1.39e-14	2	935.974	2	935.974	99.72	3.63692	-1.23771	-1.23771	supercont2.1,-:174246-174296	exon1
								ANP00383	GLFLPGYRDETAAPDPITQFLPEVK		3.85e-16	3	925.487	3	925.487	58.9	4.47287	2.63639	2.63639	supercont2.1,-:174246-174320	exon1
								ANP00384	GLFLPGYR		0.000228106	2	461.76	2	461.76	26.73	1.77424	-1.59494	-1.59494	supercont2.1,-:174297-174320	exon1
								ANP00386	YATIQTYGETTHTLIER		4.23e-16	2	999.006	2	999.006	85.98	4.27133	3.20351	3.20351	supercont2.1,-:174333-174383	exon1
								ANP00387	TSEDENGQIK		0.000737911	2	560.759	2	560.762	36.58	2.49327	3.69591	-1.28823	supercont2.1,-:174384-174413	exon1
								ANP00388	VVSEVKTSEDENGQIK		0.000583321	3	587.969	3	587.969	20.9	1.24219	2.61835	2.61835	supercont2.1,-:174384-174431	exon1
								ANP00390	DVAFEVDSVQAVFDAAVK		3.82e-16	2	955.483	2	955.483	89.06	3.82736	2.3119	2.3119	supercont2.1,-:174444-174497	exon1
								ANP00391	AYLEEIHAHLK		4.05e-11	3	441.908	3	441.908	24.31	0.887686	2.99144	2.99144	supercont2.1,-:174519-174551	exon1
								ANP00392	SLEQAAR		0.00259641	2	387.71	2	387.71	32.63	1.53586	3.50899	3.50899	supercont2.1,-:174570-174590	exon1
								ANP00393	TIASHVVSNGSVTFVLTSPLR		3.44e-13	2	1093.1	2	1093.1	130.49	6.22108	0.866949	1.09221	supercont2.1,-:174591-174653	exon1
								ANP00395	QAATYYVTR		0.00290151	2	536.776	2	536.776	48.69	2.09944	1.46792	1.46792	supercont2.1,-:174702-174728	exon1
								ANP00396	GYDHVHWYVGNAK		2.46e-11	3	515.912	2	773.362	42.91	3.57317	-3.79304	-0.805304	supercont2.1,-:174729-174767	exon1
								ANP00397	APAADIPQAAAAAPADLSQYK		1.95e-16	2	1020.52			95.42		-0.0756146		supercont2.1,-:174768-174830	exon1
TERG_00067T0	272	29.6	5.66	Trichophyton_rubrum_CBS_118892_hypothetical_protein_(273_aa)	11	0.6728	supercont2.1,+:175014-176296	ANP00398	TDSTLPQLPNIADADVQSLK		1.81e-08	2	1063.55	2	1063.55	81.77	4.03868	-0.785603	-0.785603	supercont2.1,+:175637-175696	exon2
								ANP00399	ELDALRPLQTTNENLTPEIIQTAIAQLSGIIEEHPNYAPAYLNLAQAIR		9.33e-11	4	1357.47	4	1357.47	58.02	4.39104	1.68602	1.68602	supercont2.1,+:175703-175849	exon2
								ANP00400	LSIDTGSQNQPDGPQTTPAPSNQLFDNLAK		1.03e-12	3	1052.18	3	1052.18	89.17	4.99322	-1.03695	-0.103181	supercont2.1,+:175850-175939	exon2
								ANP00401	TIALLTPSSSSDAISPFHSR		3.75e-12	2	1044.04	2	1044.04	95.8	4.05299	-3.83963	-2.77789	supercont2.1,+:175940-175999	exon2
								ANP00402	ILANAHTHR		8.2e-06	2	516.789	2	516.789	64.12	2.49932	1.9046	1.9046	supercont2.1,+:176000-176026	exon2
								ANP00404	NFLPLQLQDVSDER		6.52e-14	2	837.429	2	837.429	62.29	2.50885	0.449267	0.449267	supercont2.1,+:176090-176131	exon2
								ANP00405	NFLPLQLQDVSDERLEELASYDFQIGGR		4.15e-05	3	1084.88	3	1084.88	23.73	2.19332	0.148239	0.148239	supercont2.1,+:176090-176173	exon2
								ANP00406	LEELASYDFQIGGR		3.53e-09	2	799.393	2	799.393	54.87	3.19425	-3.88812	-3.26999	supercont2.1,+:176132-176173	exon2
								ANP00407	QMAVGTNPYAK		0.00110164	1	1179.58	1	1179.58	31.06	1.63679	-0.383946	-0.383946	supercont2.1,+:176195-176227	exon2
								ANP00408	MCGAIVK	C2(Carboxymethyl)	0.00885929	2	390.193	2	390.193	22.11	1.54531	0.456349	0.456349	supercont2.1,+:176228-176248	exon2
								ANP00409	DAIQAEIAK		3.79e-05	2	479.763	2	479.763	33.53	2.59315	-0.917365	-0.917365	supercont2.1,+:176249-176275	exon2
TERG_00068T0	403	45	5.85	Trichophyton_rubrum_CBS_118892_homogentisate_1,2-dioxygenase_(404_aa)	19	0.799	supercont2.1,-:176586-178144	ANP00410	VQDDYNEESWTPLKR		4.23e-16	2	940.447	2	940.447	95.16	3.77098	2.67518	3.33075	supercont2.1,-:176613-176657	exon4
								ANP00411	VQDDYNEESWTPLK		6.53e-08	2	862.392	2	862.392	58.49	3.57255	-2.13383	-2.13383	supercont2.1,-:176616-176657	exon4
								ANP00412	VGEGSMAFMFESCLMVGVSEWGLK	C13(Carboxymethyl)	4.58e-09	3	884.734	3	884.734	64.94	4.96786	1.29003	2.28474	supercont2.1,-:176670-176802	exon3-4
								ANP00413	TAGGFKPAGASLHNVMSAHGPDAASHEGASNAELTPKK		0.00147197	4	929.205	4	929.205	13.21	3.26144	-2.66594	-2.57053	supercont2.1,-:176803-176916	exon3
								ANP00414	TAGGFKPAGASLHNVMSAHGPDAASHEGASNAELTPK		2.83e-16	3	1195.91	3	1195.91	73.78	6.1586	-0.00472266	-0.00472266	supercont2.1,-:176806-176916	exon3
								ANP00415	NTMSEFMGLISGDYDAK		3.91e-16	2	939.918	2	939.918	44.55	4.21182	1.68126	1.68126	supercont2.1,-:176917-176967	exon3
								ANP00416	WLVQEDTFRPPWYHR		4.23e-16	3	677.342	3	677.342	28.41	3.04524	3.69879	3.69879	supercont2.1,-:176968-177012	exon3
								ANP00417	FNTIGSISYDHPDPSIFTVLTGQSDHPGTAIADFVIFPPR		2.88e-14	3	1444.06	3	1444.06	61.64	5.0802	-0.462168	0.330112	supercont2.1,-:177013-177132	exon3
								ANP00418	ATQPHTPFDIVAWHGNYYPFK		4.23e-16	4	623.059	4	623.059	17.74	3.49959	4.54132	4.54132	supercont2.1,-:177148-177210	exon3
								ANP00419	FNNTLFR		0.00013371	2	456.241	2	456.241	43.27	1.80902	2.00984	2.00984	supercont2.1,-:177211-177231	exon3
								ANP00420	DFQAPVASFDDEEEPSEYTILSK		3.25e-16	2	1309.09	2	1309.09	76.15	4.93863	-1.78511	-4.88397	supercont2.1,-:177232-177300	exon3
								ANP00421	GYICELYQGHYQLPELGPIGSNCLANPR	C4(Carboxymethyl); C23(Carboxymethyl)	2.98e-16	3	1074.5	3	1074.5	72.19	4.75267	-1.4631	-1.4631	supercont2.1,-:177301-177384	exon3
								ANP00422	VTLPEGPVR		2.04e-05	2	484.283	2	484.283	41.32	1.75019	1.36643	1.36643	supercont2.1,-:177385-177411	exon3
								ANP00423	ILVRPNEICVIPR	C9(Carboxymethyl)	4.23e-16	3	527.306	3	527.306	44.37	3.4986	3.66542	3.66542	supercont2.1,-:177502-177540	exon2
								ANP00424	EAFYSADGDFLIVPQHGVLDIQTELGR		4.56e-12	3	997.498	3	997.498	43.83	3.0851	-2.92325	-2.92325	supercont2.1,-:177541-177621	exon2
								ANP00425	HGLGILLFAAGK		1.48e-15	2	598.863	2	598.863	56.84	3.2653	3.57589	3.57589	supercont2.1,-:177634-177669	exon2
								ANP00426	GLHLVAGAGDPATK		1.71e-10	2	653.859	2	653.859	53.78	4.58066	-0.172335	-0.172335	supercont2.1,-:177670-177711	exon2
								ANP00427	WNPFDLDEK		1.05e-05	2	582.271	2	582.271	31.22	2.0733	-1.62539	-1.83855	supercont2.1,-:177727-177753	exon2
								ANP00430	PVTAFSTPEK		0.000121404	2	538.786			44.15		2.19375		supercont2.1,-:178112-178141	exon1
TERG_00069T0	435	47.1	5.83	Trichophyton_rubrum_CBS_118892_fumarylacetoacetase_(436_aa)	26	0.7701	supercont2.1,+:178715-180022	ANP00431	SNASWLQIPR	N-Term(Acetyl)	4.55e-09	2	607.322			44.46		4.48649		supercont2.1,+:178718-178747	exon1
								ANP00432	LSSFSSHIDVFTKPTLNDFAALGRPVHR		1.49e-05	6	519.611	6	519.611	16.64	2.1738	-0.514225	-0.514225	supercont2.1,+:178886-178969	exon1
								ANP00433	GYLQDIFR		2.72e-05	2	506.268	2	506.268	40.18	2.4404	3.77278	3.77278	supercont2.1,+:178979-179002	exon1
								ANP00434	GYLQDIFRDSTPYPEILK		2.01e-05	2	1078.05	2	1078.05	27.14	3.20115	-2.78316	-2.78316	supercont2.1,+:178979-179032	exon1
								ANP00435	DSTPYPEILK		0.00242789	1	1162.6	1	1162.6	19.94	1.66037	2.39016	2.39016	supercont2.1,+:179003-179032	exon1
								ANP00438	ALVPLKDVTNHLPMK		1.76e-05	3	559.322	3	559.322	30.34	1.92935	-3.64781	-4.94422	supercont2.1,+:179057-179101	exon1
								ANP00439	DVTNHLPMK	M8(Oxidation)	0.00239905	2	535.769	2	535.769	40.01	2.29072	0.469777	0.469777	supercont2.1,+:179075-179101	exon1
								ANP00440	IGDYTDFYAGLNHAFNVGVLFR		3.7e-16	2	1245.12	2	1245.12	96.75	4.66772	-0.300411	-0.300411	supercont2.1,+:179102-179167	exon1
								ANP00441	GPDNALQPNYK		1.15e-05	2	608.803	2	608.803	53.41	3.16934	1.95996	1.95996	supercont2.1,+:179168-179200	exon1
								ANP00442	HLPVGYHGR		9.36e-08	3	345.855	3	345.855	37.84	2.92517	1.42161	1.42161	supercont2.1,+:179201-179227	exon1
								ANP00443	ASSVIVSGQPVR		1.18e-09	2	600.341	2	600.341	57.39	3.48745	0.242806	0.242806	supercont2.1,+:179228-179263	exon1
								ANP00444	ASSVIVSGQPVRRPNGQILANPAATPK		0.000505668	4	682.889	4	682.889	14.8	1.98294	4.52452	4.52452	supercont2.1,+:179228-179308	exon1
								ANP00445	RPNGQILANPAATPK		1.7e-10	3	516.629	3	516.629	46.72	4.81241	4.8263	4.8263	supercont2.1,+:179264-179308	exon1
								ANP00446	VPIFSPCK	C7(Carboxymethyl)	7.56e-06	1	948.49	1	948.49	64.29	1.75476	4.55072	4.55072	supercont2.1,+:179309-179332	exon1
								ANP00447	KLDIELELAVFVGK		3.37e-05	3	525.313	3	525.313	43.08	3.83577	0.912933	0.912933	supercont2.1,+:179333-179374	exon1
								ANP00448	LDIELELAVFVGK		4.65e-06	2	723.42	2	723.42	37.24	2.33437	4.80813	4.80813	supercont2.1,+:179336-179374	exon1
								ANP00449	LGEPIPIDQAEDHLFGVVLMNDWSAR	M20(Oxidation)	3.17e-16	3	980.153	3	980.153	64.28	4.00519	0.986848	0.986848	supercont2.1,+:179384-179461	exon1
								ANP00450	DIQAWEYVPLGPFNAK		2.07e-12	2	924.469	2	924.469	85.53	3.81797	-1.37578	-1.37578	supercont2.1,+:179462-179509	exon1
								ANP00451	NFATSITPWVVLMDALEPFR		3.82e-16	2	1154.1	2	1154.1	98.44	4.38958	2.1553	2.26192	supercont2.1,+:179510-179569	exon1
								ANP00452	STGLAAEEGLDNLLPYLR		4.23e-16	2	966.512	2	966.512	72.53	4.83322	4.65516	4.65516	supercont2.1,+:179570-179623	exon1
								ANP00453	RAENVYDMQLQFDLKPANSSCTSTVAK	C21(Carboxymethyl)	1.56e-09	3	1025.49	3	1025.49	46.29	4.21555	4.72605	4.72605	supercont2.1,+:179630-179710	exon1
								ANP00454	AENVYDMQLQFDLKPANSSCTSTVAK	C20(Carboxymethyl)	4.23e-16	3	973.461	3	973.461	68.04	3.76588	4.42219	4.42219	supercont2.1,+:179633-179710	exon1
								ANP00456	NLLYSFAQMLTHHSVTGCNMNTGDLLGSGTISGK	C18(Carboxymethyl)	2.83e-16	3	1209.24	3	1209.24	94.6	5.88956	-2.72716	-2.72716	supercont2.1,+:179723-179824	exon1
								ANP00457	ETGTLGSLLENTQGGK		4.23e-16	2	802.912	2	802.912	81.09	3.93285	2.53135	2.53135	supercont2.1,+:179825-179872	exon1
								ANP00458	ETGTLGSLLENTQGGKQPMK		0.000632897	3	697.028	3	697.028	10.83	1.46063	4.29286	4.55805	supercont2.1,+:179825-179884	exon1
								ANP00460	VFLEDGDEVTLK		4.23e-16	2	682.853	2	682.853	60.77	2.71301	3.38696	3.38696	supercont2.1,+:179906-179941	exon1
TERG_00070T0	230	25.6	6.35	Trichophyton_rubrum_CBS_118892_maleylacetoacetate_isomerase_(231_aa)	10	0.6391	supercont2.1,-:180138-180830	ANP00461	EAFWQNQPDTPEELR		3.79e-10	2	930.429	2	930.429	65.04	3.70407	-2.55571	-2.55571	supercont2.1,-:180147-180191	exon1
								ANP00462	IYDLMLEEAAVK		9.74e-09	2	697.866	2	697.866	60.01	3.82911	1.0851	1.0851	supercont2.1,-:180192-180227	exon1
								ANP00463	LADYPTTK		0.000668577	2	454.74	2	454.74	44.54	1.46029	1.43704	0.629295	supercont2.1,-:180231-180254	exon1
								ANP00464	FCVGDEITLADVCLVPAVWSAER	C2(Carboxymethyl); C13(Carboxymethyl)	3.7e-16	2	1305.11	2	1305.11	51.21	4.3424	-2.75021	-2.75021	supercont2.1,-:180267-180335	exon1
								ANP00465	ELALLIATDIQPVTNLR		3.7e-16	2	940.545	2	940.545	101.99	3.90742	-1.23386	0.273655	supercont2.1,-:180447-180497	exon1
								ANP00466	ALLPPVSNPEAR		0.000105939	2	632.359	2	632.359	38.83	2.57248	3.31834	3.31834	supercont2.1,-:180510-180545	exon1
								ANP00467	VTQSLAALEYLEESLPNTR		2.15e-15	2	1067.55	2	1067.55	83.26	4.5055	-0.0636148	-0.0636148	supercont2.1,-:180546-180602	exon1
								ANP00468	EINPNATVPVLLSTHQENGK		4.89e-12	2	1081.07	2	1081.07	65.26	4.26193	-0.5965	-0.5965	supercont2.1,-:180618-180677	exon1
								ANP00469	STPYEPIFVNLLK		2.49e-07	2	760.925	2	760.925	30.6	2.7174	4.6454	4.6454	supercont2.1,-:180705-180743	exon1
								ANP00471	FQLYTYFR		0.00545061	2	569.289	2	569.289	18.34	2.26175	-2.69926	-2.69926	supercont2.1,-:180786-180809	exon1
TERG_00073T0	425	46.3	6.37	Trichophyton_rubrum_CBS_118892_NADH-dependent_flavin_oxidoreductase_(426_aa)	17	0.6612	supercont2.1,+:187320-188653	ANP00472	GDSDIDTK	N-Term(Acetyl)	0.00103817	1	892.39			35.94		0.206925		supercont2.1,+:187323-187346	exon1
								ANP00473	NISNTPAPDISYFTPYQNPPAGQAANPQSNGSAPPK		3.41e-05	3	1237.93	3	1237.93	58.13	2.87576	0.401828	0.401828	supercont2.1,+:187347-187454	exon1
								ANP00476	VVEFVHSQSQVIGIQLGHAGR		7.86e-15	3	754.408	3	754.408	70.98	5.804	-2.62121	-2.62121	supercont2.1,+:187754-187816	exon2
								ANP00477	ASTFAPWLSSGDLAPENVGGWPDNIK		3.25e-16	2	1365.17	2	1365.16	95.7	3.23752	-3.46017	3.2912	supercont2.1,+:187820-187897	exon2
								ANP00478	GPSDIPWGPR		2.54e-05	2	541.276	2	541.276	50	2.16907	1.55727	1.55727	supercont2.1,+:187898-187927	exon2
								ANP00480	EAFGASVR		0.00611911	2	418.718	2	418.718	21.28	1.21805	2.15515	2.15515	supercont2.1,+:187976-187999	exon2
								ANP00481	AVTAGVDFIEIHNAHGYLLSSFLSPTSNNR		3.25e-16	3	1077.54	3	1077.55	88.72	5.1902	0.493383	-0.987988	supercont2.1,+:188003-188092	exon2
								ANP00482	TDEYGGSFENR		1.97e-06	2	637.768	2	637.768	59.79	2.22866	0.241047	0.241047	supercont2.1,+:188093-188125	exon2
								ANP00483	LTNEIVDICR	C9(Carboxymethyl)	1.82e-14	2	617.313	2	617.313	28.05	2.3278	4.22487	4.22487	supercont2.1,+:188132-188161	exon2
								ANP00484	NMPEDMPLFLR		9.54e-05	2	681.833	2	681.833	18.59	1.58829	3.57545	3.57545	supercont2.1,+:188165-188197	exon2
								ANP00485	VSSTEWLEESRPDLPSWTVEDTVR		4.23e-16	3	940.125	3	940.125	58.38	4.41854	2.87673	2.87673	supercont2.1,+:188198-188269	exon2
								ANP00486	FAEVLAEGGK		1.99e-07	2	510.77	2	510.77	48.59	2.66807	-2.41803	-2.41803	supercont2.1,+:188270-188299	exon2
								ANP00487	VDFIDISSGGNHPDQK		3.32e-08	2	864.913	2	864.913	40.06	2.69214	-0.31936	-0.31936	supercont2.1,+:188300-188347	exon2
								ANP00488	MLVGVVGNITTGTTANR	M1(Oxidation)	1.9e-12	2	860.454	2	860.454	68.57	3.80859	-3.08652	-3.08652	supercont2.1,+:188423-188473	exon2
								ANP00489	LLEEDGLDYALVGR		4.1e-13	2	781.907	2	781.908	120.91	4.72053	1.69726	0.354017	supercont2.1,+:188474-188515	exon2
								ANP00490	HPSLVWSFAEELGVDHK		1.41e-10	3	650.996	3	650.996	50.6	4.44614	1.16771	1.16771	supercont2.1,+:188528-188578	exon2
								ANP00491	VANQMSWPFGGR		1.38e-06	2	675.322	2	675.322	64.89	3.18568	-4.56583	-4.56583	supercont2.1,+:188579-188614	exon2
TERG_00074T0	408	44.1	8.05	Trichophyton_rubrum_CBS_118892_biotin_synthase_(409_aa)	12	0.4436	supercont2.1,+:190131-191443	ANP00493	EEITQIYQTPLNQLTFAAAAVHR		2.31e-12	3	872.124	3	872.126	44.81	3.10934	-0.0745081	-2.26024	supercont2.1,+:190332-190486	exon1-2
								ANP00494	NFHDPAAIQMCTLMNIK	C11(Carboxymethyl)	5.17e-09	2	1002.97	2	1002.97	50.77	3.32254	1.15405	1.15405	supercont2.1,+:190487-190537	exon2
								ANP00495	TGGCSEDCSYCSQSSR	C4(Carboxymethyl); C8(Carboxymethyl); C11(Carboxymethyl)	7.79e-12	2	922.306	2	922.306	86.52	4.27078	-0.392658	-0.392658	supercont2.1,+:190538-190585	exon2
								ANP00497	LSSVDSVLEAAR		1.85e-10	2	623.838	2	623.838	73.32	3.22539	4.0111	4.0111	supercont2.1,+:190613-190648	exon2
								ANP00498	FCMGAAWR	C2(Carboxymethyl)	0.000189507	2	500.211	2	500.211	50.68	1.95607	-2.50299	-2.50299	supercont2.1,+:190676-190699	exon2
								ANP00499	EAGLTAYNHNVDTSR		9.33e-08	2	824.392	2	824.392	60.47	3.47801	3.19076	3.19076	supercont2.1,+:190826-190870	exon2
								ANP00500	EFYPSIITTR		0.000284247	2	613.827	2	613.827	23.03	1.84224	4.68605	4.68605	supercont2.1,+:190871-190900	exon2
								ANP00501	IQTLGHVR		0.00836986	2	462.275	2	462.274	26.34	2.16309	-1.01093	-0.471438	supercont2.1,+:190916-190939	exon2
								ANP00503	VGLIHTVATLPAHPESFPVNALVPIK		3.19e-12	3	907.52	3	907.52	39.45	5.38631	-1.90073	-1.96846	supercont2.1,+:191003-191080	exon2
								ANP00504	IVLPATIVR		0.000793431	2	491.325	2	491.325	38.34	1.5331	-1.92757	-1.92757	supercont2.1,+:191150-191176	exon2
								ANP00505	ISLTEEQQVTCFMSGANAIFTGER	C11(Carboxymethyl)	5.07e-11	2	1345.62	2	1345.62	69.89	4.08653	-4.78844	-4.78844	supercont2.1,+:191192-191263	exon2
								ANP00506	MLTTDCTGWDEDK	C6(Carboxymethyl)	0.000113607	2	786.814	2	786.814	11.86	2.03227	0.883819	0.883819	supercont2.1,+:191264-191302	exon2
TERG_00075T0	815	90.2	6.95	Trichophyton_rubrum_CBS_118892_hypothetical_protein_(816_aa)	17	0.3914	supercont2.1,-:191648-194400	ANP00509	SLVEENRECGVQEEVTVR	C9(Carboxymethyl)	5.48e-05	2	1067.51	2	1067.51	54.84	3.10443	-0.5163	-0.5163	supercont2.1,-:191669-191722	exon5
								ANP00510	LTAGEESFSIHSR		1.43e-07	2	717.354	2	717.354	58.56	2.77131	-0.717709	-0.717709	supercont2.1,-:191807-191845	exon5
								ANP00511	MENMENTGYWDEFVQDWK		1.29e-13	2	1161.48	2	1161.48	123.1	4.45829	-0.890839	-0.890839	supercont2.1,-:192115-192168	exon4
								ANP00512	SDALLHGHSYTANPVGCSVAMK	C17(Carboxymethyl)	8.38e-10	2	1158.54	2	1158.54	66.08	4.82107	1.06033	1.06033	supercont2.1,-:192181-192246	exon4
								ANP00513	LLTGGLMPLCTTLASNEIFETFDSPHK	C10(Carboxymethyl)	6.64e-13	3	998.491	3	998.491	85.14	4.49069	-2.11702	-2.11702	supercont2.1,-:192247-192327	exon4
								ANP00514	TAASFLDVDPDVSVHAK		3.65e-05	3	591.298	3	591.298	32.95	2.50043	-3.89032	-3.89032	supercont2.1,-:192328-192378	exon4
								ANP00515	CHQQPPASPDSWSGLPVIFDEVFTGLYR	C1(Carboxymethyl)	2.58e-15	3	1068.84	3	1068.84	63.09	5.30066	-1.7238	-1.7238	supercont2.1,-:192391-192474	exon4
								ANP00516	LGALIIEPIILGAGGMLFCDPLFQQSLVQVVR	C19(Carboxymethyl)	1.42e-10	4	867.98	3	1156.97	60.44	4.71533	-1.77238	-0.751436	supercont2.1,-:192499-192662	exon3-4
								ANP00518	GYWFDFPMVQMTDGVWK		1.13e-10	2	1053.97	2	1053.97	53.34	3.95151	-1.38354	-1.38354	supercont2.1,-:192828-192878	exon3
								ANP00519	GSYHGDTIGVMDCSEPSTYNK	C13(Carboxymethyl)	6.08e-05	3	773.656	3	773.657	32.93	3.42076	0.459998	-0.682657	supercont2.1,-:192903-192965	exon3
								ANP00520	YGHVMFAGTIHEPALSLSEQLLK		0.00523274	4	636.083	4	636.083	12.85	1.32185	-2.83434	-2.83434	supercont2.1,-:193116-193184	exon3
								ANP00522	HDEVFGLIDELSSK		1.63e-07	3	530.266	3	530.266	48.94	2.32484	-1.84388	-1.84388	supercont2.1,-:193461-193502	exon3
								ANP00523	LRDEEAMASFYEK		1.92e-07	2	794.867	2	794.867	54.47	2.09257	-2.72783	-2.72783	supercont2.1,-:193512-193550	exon3
								ANP00524	LPVILIADHR		6.96e-06	2	573.853	2	573.853	31.5	2.46364	-0.23661	-0.23661	supercont2.1,-:193755-193784	exon3
								ANP00525	IPHNDELLESIK		1.54e-05	3	469.921	3	469.921	37.17	2.76154	1.30759	1.30759	supercont2.1,-:193905-193940	exon3
								ANP00526	TVVSAVLFNAIPAYRPWASSK		1.1e-09	3	759.751	3	759.751	42.07	3.16779	-0.730329	-0.730329	supercont2.1,-:194266-194328	exon1
								ANP00527	AYQVYAANTDIGK		0.00203639	2	707.352	2	707.352	14.14	1.61303	-2.92799	-2.92799	supercont2.1,-:194329-194367	exon1
TERG_00076T0	420	46.2	6.84	Trichophyton_rubrum_CBS_118892_aminotransferase_(421_aa)	1	0.0405	supercont2.1,+:195514-196936	ANP00528	VLEALLLDDPLLLAGQR		4.81e-11	3	617.03	3	617.03	54.38	3.24307	-1.42778	-1.42778	supercont2.1,+:195994-196044	exon1
TERG_00077T0	736	79.6	7.69	Trichophyton_rubrum_CBS_118892_eukaryotic_peptide_chain_release_factor_GTP-binding_subunit_(737_aa)	30	0.5122	supercont2.1,-:197489-199763	ANP00531	LITDPTTTA		0.00320965	1	932.493	1	932.493	22.67	1.62451	-0.412676	-0.412676	supercont2.1,-:197492-197518	exon2
								ANP00532	DQGQTIAIGMITK		1.18e-09	2	688.365	2	688.365	94.47	3.60258	-1.36937	-1.36937	supercont2.1,-:197519-197621	exon1-2
								ANP00533	FEDYNQLGR		3.51e-06	2	571.268	2	571.268	46.35	2.45935	2.03634	2.03634	supercont2.1,-:197634-197660	exon1
								ANP00534	LEIASGGSAVCVEKFEDYNQLGR	C11(Carboxymethyl)	3.19e-05	3	848.41	3	848.41	36.9	2.13089	2.83888	2.83888	supercont2.1,-:197634-197702	exon1
								ANP00535	LEIASGGSAVCVEK	C11(Carboxymethyl)	1.13e-09	2	710.853	2	710.853	88.6	2.54924	-0.726416	-0.726416	supercont2.1,-:197661-197702	exon1
								ANP00538	SILTAGFNCVMHVHSAIEEVTFAELLHK	C9(Carboxymethyl)	7.1e-07			5	631.718		2.38183		-2.97402	supercont2.1,-:197778-197861	exon1
								ANP00539	RPVHCVTAFEAK	C5(Carboxymethyl)	1.73e-07	3	472.575	3	472.575	40.64	3.01577	0.17914	0.17914	supercont2.1,-:197883-197918	exon1
								ANP00540	GVEEEDILPGFVMCSPK	C14(Carboxymethyl)	4.23e-16	2	954.438	2	954.438	59.88	3.45368	-4.0007	-4.0007	supercont2.1,-:197919-197969	exon1
								ANP00541	TEITVTALYGETEDEIQTATCGDQIR	C21(Carboxymethyl)	3.09e-10	2	1458.17	2	1458.17	90.45	4.20549	-2.79702	-2.79702	supercont2.1,-:197982-198059	exon1
								ANP00544	DMGTVIEGR		0.000270929	2	489.24	2	489.24	38.35	2.00271	0.16192	0.16192	supercont2.1,-:198114-198140	exon1
								ANP00545	YKDMGTVIEGR		0.00116551	2	634.821	2	634.821	16.14	1.8419	4.20335	4.20335	supercont2.1,-:198114-198146	exon1
								ANP00546	INAPFMMPISAK		2.58e-05	2	660.348	2	660.348	21.09	2.12924	2.80923	2.80923	supercont2.1,-:198147-198182	exon1
								ANP00547	DIAPWYDGPGLLPYLHNMK		8.17e-10	2	1100.55	2	1100.55	81.99	3.64794	3.68461	-1.57236	supercont2.1,-:198198-198254	exon1
								ANP00548	TIGIDKPVPK		3.91e-05	2	534.327	2	534.327	52.66	2.5462	0.292098	0.292098	supercont2.1,-:198255-198284	exon1
								ANP00550	SDLHFMPISAQK		0.000349244	3	458.568	3	458.568	12.78	2.01027	0.859317	0.859317	supercont2.1,-:198285-198320	exon1
								ANP00552	YVEALGYK		0.00020647	1	942.497	1	942.497	36.46	1.84035	4.26227	4.26227	supercont2.1,-:198324-198347	exon1
								ANP00554	LIIAVNK		0.00902724	2	385.761	2	385.761	12.27	2.00729	1.19605	1.19605	supercont2.1,-:198414-198434	exon1
								ANP00555	EHALLAR		0.00722362	2	405.235	2	405.235	23.77	1.51335	-0.353099	-0.353099	supercont2.1,-:198453-198473	exon1
								ANP00556	KGEYETGFER		0.00341995	2	608.287			33.29		2.78887		supercont2.1,-:198489-198518	exon1
								ANP00557	HYTILDAPGHK		0.000816084	3	417.888	3	417.888	37.19	2.98418	0.822206	1.62778	supercont2.1,-:198588-198620	exon1
								ANP00558	TSGDTPDGPMTR		1.46e-07	2	617.774	2	617.774	40.67	1.41494	2.61063	2.61063	supercont2.1,-:198621-198656	exon1
								ANP00559	STLGGSILYCTGMVDER	C10(Carboxymethyl)	7.35e-11	2	930.427	2	930.427	110.72	4.41978	-2.51599	-2.51599	supercont2.1,-:198789-198839	exon1
								ANP00560	EHVNLVFIGHVDAGK		1.17e-11	2	817.935	2	817.935	92.32	4.78063	-1.33018	-1.63217	supercont2.1,-:198840-198884	exon1
								ANP00561	EQAADVDEATLKEIYGEKR		0.00353319	3	722.366	3	722.366	25.96	2.02648	4.77797	4.77797	supercont2.1,-:198885-198941	exon1
								ANP00563	EQAADVDEATLK		1.98e-05	2	645.315	2	645.315	18.15	1.54771	0.940123	0.940123	supercont2.1,-:198906-198941	exon1
								ANP00566	STGPAAAAAGAK		1.01e-06	2	486.759	2	486.759	39.1	1.7662	0.16467	0.342495	supercont2.1,-:199077-199112	exon1
								ANP00567	APAASATSTTEAQK		2.6e-06	2	667.334	2	667.334	50.21	3.17456	2.14215	2.14215	supercont2.1,-:199113-199154	exon1
								ANP00568	SKAPAASATSTTEAQK		3.34e-07	2	774.898	2	774.898	56.13	2.55655	1.57099	1.57099	supercont2.1,-:199113-199160	exon1
								ANP00569	VLTIGGDIPK		0.00286243	2	506.808	2	506.808	26.29	2.27953	4.87539	4.87539	supercont2.1,-:199161-199190	exon1
								ANP00570	SNPAPADATTDATTDTAAAAATPKPTPSEPSKPSPASQPPK		6.23e-16	3	1314.98	3	1314.98	99.69	3.35675	0.866468	0.866468	supercont2.1,-:199197-199319	exon1
TERG_00078T0	287	31.8	6	Trichophyton_rubrum_CBS_118892_nicotinamide_mononucleotide_adenylyl_transferase_(288_aa)	6	0.4042	supercont2.1,-:200694-201747	ANP00571	ENIYVIQQLIQNDVSSTK		5.43e-11	2	1046.55	2	1046.55	107.91	5.45886	0.563057	0.563057	supercont2.1,-:200856-200909	exon3
								ANP00572	SGTDIDEAIAGLQPWK		1.06e-06	2	850.925	2	850.925	70.79	2.67588	-3.93739	-3.93739	supercont2.1,-:200910-200957	exon3
								ANP00573	IALLAGADLIHTMSTPGVWSEQDLDHILGK		8.43e-15	3	1067.89	3	1067.89	83.12	6.36812	0.207602	-0.942233	supercont2.1,-:201091-201180	exon2
								ANP00574	IINHDYGGIDIGDGTK		3.14e-05	3	563.281	3	563.281	14.99	1.75533	0.759205	0.759205	supercont2.1,-:201193-201240	exon2
								ANP00575	FELIGGYLSPVSDAYR		4.06e-07	2	893.955	2	893.955	65.91	4.01571	0.734827	0.734827	supercont2.1,-:201469-201516	exon1
								ANP00576	TPLLLVACGSFSPITYLHLR	C8(Carboxymethyl)	8.89e-09	3	753.744	3	753.744	39.63	2.70788	-2.0375	-2.0375	supercont2.1,-:201559-201618	exon1
TERG_00080T0	798	90.6	6.98	Trichophyton_rubrum_CBS_118892_hypothetical_protein_(799_aa)	1	0.0401	supercont2.1,-:205854-208735	ANP00579	SASSLCYSHLQENMLVQELVSAVTQALNIPGK	C6(Carboxymethyl)	0.000930839	3	1163.58	3	1163.58	27.23	3.74146	-1.76225	-1.76225	supercont2.1,-:206490-206585	exon7
TERG_00084T0	1186	126.9	5.06	Trichophyton_rubrum_CBS_118892_hypothetical_protein_(1187_aa)	26	0.2968	supercont2.1,-:217005-220805	ANP00586	WATTEEETQPAKEETDGKQEDSVPSAMEGEK		1.06e-14	3	1146.52	3	1146.52	23.26	5.22267	1.71463	4.98403	supercont2.1,-:217446-217538	exon1
								ANP00587	IQEYEASVAK		0.00361801	2	569.294	2	569.294	22.72	2.27921	2.06288	2.06288	supercont2.1,-:217650-217679	exon1
								ANP00588	YSQLESDMAALSEK		1.51e-08	2	786.365	2	786.365	82.83	4.33886	-1.93421	-1.93421	supercont2.1,-:217701-217742	exon1
								ANP00589	DAASEAQANSQEVEK		6.15e-07	2	788.861	2	788.861	62.39	2.92798	3.55957	3.55957	supercont2.1,-:217746-217790	exon1
								ANP00591	EAAADTTSLDSLKAEMEELK		0.000974172	3	718.018	3	718.018	18.26	1.93217	3.77296	3.77296	supercont2.1,-:218004-218063	exon1
								ANP00592	GVEELLAAHEEK		3.76e-05	2	662.842	2	662.842	33.78	2.85995	1.66098	1.66098	supercont2.1,-:218178-218213	exon1
								ANP00593	IEALQTDHAQQIEEHSAK		1.47e-08	2	1024.51	2	1024.51	53.88	3.91197	4.83048	4.83048	supercont2.1,-:218352-218405	exon1
								ANP00594	TLQEEQETLR		5.79e-09	2	623.819	2	623.819	30.09	2.28278	4.22914	3.23533	supercont2.1,-:218445-218474	exon1
								ANP00595	HESETVALQEK		1.14e-06	2	635.818	2	635.818	55.13	2.29609	0.541453	0.541453	supercont2.1,-:218481-218513	exon1
								ANP00597	SVIETLTAGVEAEK		1.72e-09	2	723.888	2	723.888	100.26	3.85706	-0.404084	-0.404084	supercont2.1,-:218733-218774	exon1
								ANP00598	TTIQGLEAELAQQK		4.23e-16	2	765.415	2	765.415	55	3.44926	3.41326	3.41326	supercont2.1,-:218775-218816	exon1
								ANP00599	AEEALANEK		0.00497208	2	487.745	2	487.745	18.61	1.75986	4.74433	4.74433	supercont2.1,-:218880-218906	exon1
								ANP00600	VESSQSSFDTEIQSLK		4.23e-16	2	892.932	2	892.932	80.61	3.52757	3.23273	0.883799	supercont2.1,-:218922-218969	exon1
								ANP00601	LTAENTSLSSK		0.000201956	2	575.802	2	575.802	18.48	1.61388	2.23477	2.23477	supercont2.1,-:218970-219002	exon1
								ANP00602	HEAAIAEINK		0.000803784	2	548.295	2	548.295	24.43	1.70164	3.77847	3.77847	supercont2.1,-:219015-219044	exon1
								ANP00603	ALAEMVAGHDAALAK		3.34e-09	2	734.385	2	734.385	70	4.42049	-0.520742	-0.520742	supercont2.1,-:219144-219188	exon1
								ANP00604	LNSEIQSLQDDITK		1.46e-08	2	802.412	2	802.412	83.85	4.89118	-0.610048	-0.610048	supercont2.1,-:219255-219296	exon1
								ANP00605	KLNSEIQSLQDDITK		1.52e-08	2	866.458	2	866.458	84.1	4.62778	-1.70348	-1.70348	supercont2.1,-:219255-219299	exon1
								ANP00606	ELESAQESSTQSAAALEEK		2.83e-16	2	1004.47	2	1004.47	105.51	3.71875	-1.79946	-1.12472	supercont2.1,-:219402-219458	exon1
								ANP00607	KELESAQESSTQSAAALEEK		3.06e-11	2	1068.52	2	1068.52	89.44	4.61237	2.40138	2.40138	supercont2.1,-:219402-219461	exon1
								ANP00608	EEHEAAVQSLEAELATK		2.99e-16	2	927.955	2	927.955	76.82	4.70497	-2.94829	-2.94829	supercont2.1,-:219624-219674	exon1
								ANP00609	HEELAESYFQEIK		7.15e-07	2	811.89	2	811.89	53.55	3.68578	1.95883	1.95883	supercont2.1,-:219816-219854	exon1
								ANP00610	SGEDSSKHEELAESYFQEIK		2.39e-12	3	771.691	3	771.691	75.47	4.11733	2.86911	3.34187	supercont2.1,-:219816-219875	exon1
								ANP00611	MAELESQLAASEAK		4.78e-08	2	739.367	2	739.367	112.42	3.62744	4.77586	4.77586	supercont2.1,-:219915-219956	exon1
								ANP00612	TPGSTTLGGAASTTR		0.000217242	2	689.355	2	689.355	36.01	2.53387	4.78521	4.78521	supercont2.1,-:220401-220445	exon1
								ANP00613	STSGSTLSKPPIRPAANTAAR		0.00101353	3	695.049	3	695.049	24.41	1.44009	1.58659	3.18232	supercont2.1,-:220449-220511	exon1
TERG_00086T0	455	50	6.32	Trichophyton_rubrum_CBS_118892_phosphotyrosyl_phosphatase_activator_(456_aa)	3	0.1209	supercont2.1,+:224410-225906	ANP00615	FPVVQHFPFGSLFVWK		6.35e-09	3	645.682	3	645.682	38.02	3.1931	0.275577	0.275577	supercont2.1,+:225571-225618	exon3
								ANP00616	QDPNATSTAPSAHTSSGPQIR		0.000288423	3	708.342	3	708.342	20.6	2.50553	-0.297853	-0.297853	supercont2.1,+:225619-225681	exon3
								ANP00617	TQIPASPSLSAQSDAGTR		0.000954796	2	893.952	2	893.952	26.26	2.47975	2.16902	2.16902	supercont2.1,+:225682-225735	exon3
TERG_00088T0	872	94.7	7.52	Trichophyton_rubrum_CBS_118892_beta-1,4-glucosidase_(873_aa)	4	0.0814	supercont2.1,-:227841-230630	ANP00620	AVAQLYVELPAELAANTPK		3.57e-11	2	999.547	2	999.547	59	3.90258	-2.07829	-2.07829	supercont2.1,-:228066-228122	exon3
								ANP00621	TLHELYLWPFAEAVR		4.05e-05	3	615.661	3	615.661	11.2	1.95806	-0.0310835	-0.0310835	supercont2.1,-:229881-229925	exon1
								ANP00622	NWEGFGADPSLQAIGGALTIK		8.28e-10	2	1073.05	2	1073.05	52.71	3.3385	0.387758	0.387758	supercont2.1,-:230043-230105	exon1
								ANP00623	FGIPNLCLQDGPLGVR	C7(Carboxymethyl)	5.61e-16	2	878.959	2	878.959	39.54	2.67045	3.72624	3.72624	supercont2.1,-:230280-230327	exon1
TERG_00089T0	312	34.1	6.52	Trichophyton_rubrum_CBS_118892_5'-methylthioadenosine_phosphorylase_(313_aa)	17	0.7244	supercont2.1,-:231562-232766	ANP00624	MSWLFPGYFSN		0.000655718	2	674.808	2	674.808	24.65	1.59132	3.72645	3.72645	supercont2.1,-:231565-231597	exon3
								ANP00625	FGLSTKPGNISASALSK		3.37e-10	2	839.46	2	839.46	65.14	3.84671	-2.60465	-2.60465	supercont2.1,-:231598-231648	exon3
								ANP00626	DEHEDLVK		0.00676477	2	492.737	2	492.737	23.12	1.46606	3.91014	3.91014	supercont2.1,-:231676-231699	exon3
								ANP00627	NFISAVLDELTKDEHEDLVK		3.01e-14	2	1158.09	2	1158.09	89.43	6.10488	4.64032	4.64032	supercont2.1,-:231676-231735	exon3
								ANP00628	NFISAVLDELTK		1.97e-09	2	675.368	2	675.368	69.86	3.6049	-1.68347	-1.68347	supercont2.1,-:231700-231735	exon3
								ANP00629	SWGGSVINMSCLPESK	C11(Carboxymethyl)	4.23e-16	2	876.904	2	876.904	54.2	3.97469	4.3187	4.3187	supercont2.1,-:231871-231918	exon3
								ANP00630	AESNLYR		0.00984955	2	426.715	2	426.715	27.94	1.48496	2.45931	2.45931	supercont2.1,-:231919-231939	exon3
								ANP00631	GTLICMEGPQFSTR	C5(Carboxymethyl)	1.99e-08	2	799.374	2	799.374	54.33	3.71535	3.97168	3.97168	supercont2.1,-:231940-232094	exon2-3
								ANP00632	ACGHSLEGEGVILHDR	C2(Carboxymethyl)	6.93e-13	2	875.913	2	875.913	72.24	3.7544	0.222429	0.222429	supercont2.1,-:232095-232142	exon2
								ANP00633	GVRPWTFFEDGIVNHVGFADPFDEK		1.68e-13	4	720.6	4	720.6	66.92	4.6741	-0.545463	-0.545463	supercont2.1,-:232161-232235	exon2
								ANP00634	DFVVPDQVIDR		1.98e-05	2	651.84	2	651.84	39.57	1.93535	3.19961	3.19961	supercont2.1,-:232242-232274	exon2
								ANP00635	ANIAALR		0.0010911	2	364.725			51.84		2.06547		supercont2.1,-:232344-232364	exon2
								ANP00636	HGLHHQLSPHEVPSR		3.3e-06	4	433.476	4	433.476	28.48	4.43422	-1.40657	-1.40657	supercont2.1,-:232365-232409	exon2
								ANP00637	VVPIAFISR		0.00269794			2	501.31		1.39527		-1.27893	supercont2.1,-:232410-232436	exon2
								ANP00638	VATLIITTPWGEPSSPISILHHTCSTSGK	C24(Carboxymethyl)	4.23e-16	3	1031.2	3	1031.2	46.56	2.02024	4.45768	4.45768	supercont2.1,-:232437-232523	exon2
								ANP00639	EPVHIGVIGGTGLSELPHFTK		1.06e-12	3	730.065	3	730.065	23.48	3.19169	1.5467	1.5467	supercont2.1,-:232524-232739	exon1-2
								ANP00640	TITSDTYKEPVHIGVIGGTGLSELPHFTK		8.8e-13	4	775.157			48.32		-4.37729		supercont2.1,-:232524-232763	exon1-2
TERG_00090T0	320	37.1	10.58	Trichophyton_rubrum_CBS_118892_cellular_morphogenesis_protein_(321_aa)	1	0.0344	supercont2.1,-:233338-234713	ANP00641	IAESPVFIHLK		8.38e-06	3	418.581	3	418.581	28.92	2.30234	3.13111	3.13111	supercont2.1,-:234303-234335	exon2
TERG_00092T0	318	35.7	9.25	Trichophyton_rubrum_CBS_118892_ubiquinone_biosynthesis_methyltransferase_coq5_(319_aa)	15	0.6792	supercont2.1,-:238048-239067	ANP00643	AGFLTPGDGYENLSLGIAAIHK		3.12e-10	2	1122.59	2	1122.59	70.01	3.67772	3.86073	3.86073	supercont2.1,-:238069-238134	exon2
								ANP00644	FPSQEEFR		0.000413967	2	520.248	2	520.248	44.5	2.11955	3.62688	3.62688	supercont2.1,-:238150-238173	exon2
								ANP00645	ASYQYLVESIER		3.69e-05	2	729.366	2	729.366	40.03	1.89728	-1.71173	-1.71173	supercont2.1,-:238174-238209	exon2
								ANP00646	WSFGAIPLIGQLVAGDR		1.16e-09	2	900.494	2	900.494	34.55	2.33581	0.00728209	0.00728209	supercont2.1,-:238210-238260	exon2
								ANP00647	VTVGAFDK		0.00995267	2	418.73	2	418.73	27.99	1.58078	1.3299	1.3299	supercont2.1,-:238273-238296	exon2
								ANP00648	ILKPGGVFACLEFSK	C10(Carboxymethyl)	1.95e-08	3	556.299	3	556.299	34.46	2.94341	-2.6192	-2.6192	supercont2.1,-:238297-238341	exon2
								ANP00649	QAALEEAYR		0.000547216	2	525.766	2	525.766	29.28	2.3717	2.52306	2.52306	supercont2.1,-:238342-238368	exon2
								ANP00650	LSFMQGNAESMPSIPSNSVDLYTVAFGIR		0.000186494	3	1044.51	3	1044.51	32.42	3.55462	-0.387388	-0.387388	supercont2.1,-:238384-238470	exon2
								ANP00651	SLDTPYYNSDR		0.000318273	2	665.8	2	665.8	38.07	2.22773	0.412535	0.820823	supercont2.1,-:238471-238503	exon2
								ANP00652	VTVADINPDMLTEGK		3.87e-06	2	801.903	2	801.903	56.08	2.95125	-4.12777	-4.12777	supercont2.1,-:238510-238554	exon2
								ANP00653	MLDHATNIK		0.000524803	1	1042.53	1	1042.53	35.84	2.01719	-0.126118	-0.126118	supercont2.1,-:238573-238599	exon2
								ANP00654	SGSSEVEHQGWNILDVAGGTGDIAFR		5.88e-10	3	901.431	3	901.431	35.23	2.81949	-1.189	-1.189	supercont2.1,-:238600-238677	exon2
								ANP00655	SYDTMNDFMSLGIHR		4.17e-08	2	893.901	2	893.901	105.2	4.15986	3.35425	3.35425	supercont2.1,-:238747-238791	exon2
								ANP00656	VGAVFSSVAR		1e-06	2	496.78	2	496.78	65.1	3.31282	-1.87504	0.0672353	supercont2.1,-:238792-238884	exon1-2
								ANP00658	KTHFGFETVR		0.000331155	3	407.884	3	407.884	37.66	3.21532	0.697231	0.697231	supercont2.1,-:238906-238935	exon1
TERG_00093T0	447	50.1	8.51	Trichophyton_rubrum_CBS_118892_2-oxoisovalerate_dehydrogenase_alpha_subunit_(448_aa)	23	0.5996	supercont2.1,+:241804-243406	ANP00660	FTSEMSFVTPASNPAIPTYR	M5(Oxidation)	1.68e-10	2	1116.53	2	1116.53	44.32	3.02191	-2.54479	-2.54479	supercont2.1,+:242028-242087	exon2
								ANP00661	VMDSEGMIVDK		1.49e-06	2	612.286	2	612.286	58.64	2.32544	0.323334	0.323334	supercont2.1,+:242088-242120	exon2
								ANP00662	SRGPPDVKDEEVITWYK		1.13e-07	2	1010.01	2	1010.01	67.03	3.70094	-1.84744	-1.84744	supercont2.1,+:242121-242171	exon2
								ANP00663	GPPDVKDEEVITWYK		6.01e-08	2	888.444	2	888.444	64.54	3.19984	-3.02208	-3.02208	supercont2.1,+:242127-242171	exon2
								ANP00664	DEEVITWYK		0.00778701	2	591.787	2	591.787	37.51	2.37776	-0.50246	-0.712143	supercont2.1,+:242145-242171	exon2
								ANP00665	DVIFCQYR	C5(Carboxymethyl)	0.00159366	2	551.257	2	551.257	17.55	1.52423	3.52634	3.52634	supercont2.1,+:242433-242456	exon4
								ANP00666	ETGVFQQR		0.000683293	2	482.746	2	482.746	30.03	1.63593	0.275498	0.275498	supercont2.1,+:242457-242480	exon4
								ANP00667	QFMSQLFSNR		0.000111775	2	629.309	2	629.309	35.34	2.08793	4.5453	4.5453	supercont2.1,+:242496-242525	exon4
								ANP00669	DVNTHTISSTLATQIPHASGAAYALK		6.54e-14	3	889.799	3	889.799	54.35	5.49419	3.2211	3.2211	supercont2.1,+:242574-242704	exon4-5
								ANP00670	ALQDPNAEK		0.000142312	2	493.253	2	493.253	24.88	1.82371	2.99772	2.99772	supercont2.1,+:242711-242737	exon5
								ANP00671	QVVACYFGEGAASEGDFHAALNIAATR	C5(Carboxymethyl)	9.61e-07	3	942.772	3	942.772	52.61	3.5506	-3.00224	-4.53308	supercont2.1,+:242738-242818	exon5
								ANP00672	SCPVIFICR	C2(Carboxymethyl); C8(Carboxymethyl)	4.23e-05	2	577.272	2	577.272	37.66	1.90927	-1.50361	-1.50361	supercont2.1,+:242819-242845	exon5
								ANP00673	NNGYAISTPTLEQYR		3.21e-09	2	863.922	2	863.922	61.02	3.28746	-2.00367	-2.00367	supercont2.1,+:242846-242890	exon5
								ANP00674	GIGYGIDTIR		8.79e-07	2	532.793	2	532.793	65.62	3.06634	5.01902	5.01902	supercont2.1,+:242912-242941	exon5
								ANP00675	VDGNDIFAVR		4.49e-09	2	553.287	2	553.287	86.24	2.84391	2.97145	2.97145	supercont2.1,+:242942-242971	exon5
								ANP00677	ALEGSMRPVLIEAMSYR	M6(Oxidation)	0.00011744	3	646.999	3	646.999	13.07	1.23825	2.82357	2.82357	supercont2.1,+:242999-243049	exon5
								ANP00678	ISHHSTSDDSFAYR		4.71e-09	3	541.578	3	541.578	62.92	3.71434	0.25578	0.25578	supercont2.1,+:243050-243091	exon5
								ANP00679	ARVEVEDWK		0.00492695	3	377.865	3	377.865	31.48	2.48566	1.35992	1.35992	supercont2.1,+:243092-243118	exon5
								ANP00681	GIWNEDLER		4.57e-06	2	566.277	2	566.277	57.07	2.61092	3.98795	3.00108	supercont2.1,+:243167-243193	exon5
								ANP00682	KDVLAEFAAAER		0.000242719	2	660.354	2	660.354	42.33	3.12961	3.29095	3.29095	supercont2.1,+:243215-243250	exon5
								ANP00683	DVLAEFAAAER		1.84e-14	2	596.306	2	596.306	71.19	3.53779	2.81763	2.81763	supercont2.1,+:243218-243250	exon5
								ANP00684	EMFTDVFAELTPEVK		6.35e-16	3	585.955	3	585.955	55.7	3.72732	-1.08892	-0.218735	supercont2.1,+:243272-243316	exon5
								ANP00685	EYDLSEFEGGLK		7.1e-08	2	693.822	2	693.822	57.52	2.12528	-3.50031	-3.50031	supercont2.1,+:243362-243397	exon5
TERG_00094T0	795	86.2	8.98	Trichophyton_rubrum_CBS_118892_hypothetical_protein_(796_aa)	2	0.0428	supercont2.1,-:244051-246727	ANP00686	AMINASQAELDVSR		0.00114021			2	752.879		1.76005		4.99366	supercont2.1,-:244162-244203	exon3
								ANP00687	RPSFGPGLEELMNMPDVELR		0.00313465	3	763.047	3	763.047	10.63	2.39162	2.3556	2.3556	supercont2.1,-:244204-244263	exon3
TERG_00095T0	811	87.5	9.25	Trichophyton_rubrum_CBS_118892_hypothetical_protein_(812_aa)	6	0.1702	supercont2.1,-:247053-249826	ANP00691	ILQAPAEEENLESGSSQLGGEPEDAHGGVGVPGR		3.37e-15	3	1129.54	3	1129.54	106.41	5.38485	0.734352	0.734352	supercont2.1,-:248049-248150	exon5
								ANP00692	FHFSTEAVPDNELVFIENHPSLIDPYGGVK		1.57e-06	4	843.667	4	843.667	27.69	2.53192	-3.66105	-3.07888	supercont2.1,-:248211-248300	exon5
								ANP00694	YPSNGSSSVISQAPNQLTQRPSPAISHAR		4.02e-08	4	763.389	4	763.389	47.25	3.57599	-2.38664	-2.38664	supercont2.1,-:248676-248762	exon5
								ANP00695	KIDAATCIAAVDGSPNGDR	C7(Carboxymethyl)	5.24e-10	2	966.459	2	966.459	71.36	3.13555	-1.61768	-1.61768	supercont2.1,-:248981-249037	exon4
								ANP00696	GDQYFGQYGDIDK		1.27e-06	2	753.33	2	753.33	60.92	2.46947	-0.503645	-0.503645	supercont2.1,-:249110-249148	exon4
								ANP00697	NLVYVIGLNPTIR		4.2e-05	2	736.437	2	736.437	38.36	2.92587	2.20045	2.20045	supercont2.1,-:249179-249217	exon4
TERG_00096T0	291	33.4	8.72	Trichophyton_rubrum_CBS_118892_NADH-ubiquinone_oxidoreductase_subunit_(292_aa)	15	0.6873	supercont2.1,+:250352-251392	ANP00700	EEPRPAVGQLNRPIVNPTDK		0.00976819			4	558.306		1.38215		3.87064	supercont2.1,+:250508-250662	exon1-2
								ANP00701	EEPRPAVGQLNRPIVNPTDKYK		3.06e-06	4	631.091	4	631.091	13.26	3.38804	-3.82961	-3.2446	supercont2.1,+:250508-250668	exon1-2
								ANP00702	LHTYGQYLISCLPK	C11(Carboxymethyl)	5.3e-09	2	847.438	2	847.438	59.53	3.45994	4.69211	4.69211	supercont2.1,+:250684-250725	exon2
								ANP00703	DELTIYIPPAGVVPVMTFLR		0.00045562	2	1116.11	2	1116.11	17.66	2.31749	0.704985	0.704985	supercont2.1,+:250753-250812	exon2
								ANP00704	DHTAAEYTQVSDITAVDFPTR		4.24e-14	2	1169.06	2	1169.06	118.37	6.48119	3.04445	2.83394	supercont2.1,+:250813-250875	exon2
								ANP00705	FEVVYNLLSVR		2.35e-06	2	669.874	2	669.874	65.38	3.41582	-1.32171	-1.32171	supercont2.1,+:250885-250917	exon2
								ANP00706	TYADEATPVPSITSLYDGALWFER		2.63e-13	2	1351.66	2	1351.66	74.81	4.09705	1.85209	1.85209	supercont2.1,+:250942-251013	exon2
								ANP00707	EVYDMFGVFFTGHPDLR		3.97e-14	2	1015.48	2	1015.48	100.95	3.84958	-1.61286	-1.61286	supercont2.1,+:251014-251064	exon2
								ANP00708	IMTDYGFDGHPLR		9.7e-09	2	761.364	2	761.364	50.25	3.52118	3.70765	3.70765	supercont2.1,+:251068-251106	exon2
								ANP00709	KDFPLSGYTEIR		3.05e-06	2	713.374	2	713.374	70.8	3.33011	1.85009	1.85009	supercont2.1,+:251107-251142	exon2
								ANP00710	DFPLSGYTEIR		3.48e-07	2	649.324	2	649.324	50.08	2.43778	-1.01793	-1.01793	supercont2.1,+:251110-251142	exon2
								ANP00711	IVVEPLELTQAFR		1.35e-11	3	505.623	3	505.623	67.36	3.45708	-2.01142	-2.01142	supercont2.1,+:251164-251202	exon2
								ANP00712	NFEGGSSAWEGIGQGVDR		6.49e-10	2	933.421	2	933.421	87.02	3.57983	-3.3165	-3.3165	supercont2.1,+:251203-251256	exon2
								ANP00713	LPTPKPEEKPEEQK		3.33e-06	2	825.441	2	825.441	38.85	3.09802	1.79407	2.31769	supercont2.1,+:251345-251386	exon3
								ANP00714	LPTPKPEEKPEEQKK		1.1e-05	3	593.328	3	593.328	37.82	4.1318	0.789216	0.789216	supercont2.1,+:251345-251389	exon3
TERG_00101T0	377	42.2	6.35	Trichophyton_rubrum_CBS_118892_esterase_(378_aa)	4	0.2228	supercont2.1,+:262870-264603	ANP00716	VADPALLQMQPEETLQPLINSIPEELVGR		4.2e-05	3	1067.57	3	1067.57	17.8	3.30051	4.11494	4.11494	supercont2.1,+:263349-263435	exon2
								ANP00717	LHTHQIPIEEFR		0.0098627	3	507.272	3	507.272	14.58	2.42086	-0.732864	-0.732864	supercont2.1,+:263484-263519	exon2
								ANP00718	LAPEHPYPTAIEDCWAAVQWVR	C14(Carboxymethyl)	0.00154925	3	870.754	3	870.754	10.49	2.17202	1.12489	1.12489	supercont2.1,+:263800-263947	exon3-4
								ANP00720	LAVGGASAGGHLAAVMAHLCR	C20(Carboxymethyl)	3.13e-05	3	674.01	3	674.01	26.34	1.91965	-3.73029	-3.73029	supercont2.1,+:263984-264046	exon4
TERG_00102T0	532	57.4	8.6	Trichophyton_rubrum_CBS_118892_fumarate_hydratase_class_II_(533_aa)	25	0.6335	supercont2.1,+:264990-266990	ANP00722	TETDAFGEIQVPGDK		4.92e-16	2	803.881	2	803.881	82.26	4.39449	-2.78005	-2.78005	supercont2.1,+:265292-265401	exon2-3
								ANP00723	TETDAFGEIQVPGDKYWGAQTQR		3.1e-09	3	866.41	3	866.41	47.15	1.63432	-4.56683	-4.56683	supercont2.1,+:265292-265425	exon2-3
								ANP00724	YWGAQTQR		0.000558501	1	1009.48	1	1009.48	40.11	1.37651	-0.66223	-0.66223	supercont2.1,+:265402-265425	exon3
								ANP00725	SLGNFDIGQPQDR		5.71e-08	2	723.855	2	723.855	54.34	2.38343	3.80304	3.80304	supercont2.1,+:265496-265534	exon4
								ANP00727	GAAATVNMK		0.000246435	1	862.445	1	862.445	35.09	1.82625	0.0226768	0.0226768	supercont2.1,+:265574-265600	exon4
								ANP00728	FGLDPTIGK		3.29e-05	2	474.265	2	474.265	39.29	2.10056	3.4701	3.4701	supercont2.1,+:265601-265730	exon4-5
								ANP00729	AIQQAAAEVADLK		2.2e-13	2	664.367	2	664.367	58.28	3.69522	3.20449	3.20449	supercont2.1,+:265731-265769	exon5
								ANP00730	LVDHFPLVVWQTGSGTQSNMNANEVISNR	M20(Oxidation)	1.28e-17	3	1077.19	3	1077.19	76.08	6.35312	-1.62677	-1.62677	supercont2.1,+:265770-265856	exon5
								ANP00731	AIEILGGTMGSK		3.71e-07	2	588.819	2	588.819	56.06	3.36209	0.701981	0.701981	supercont2.1,+:265857-265892	exon5
								ANP00732	KPVHPNDHVNMSASSNDTFPTVMHIAAVLEIEDTLLPALTSLK		0.000364758			4	1164.1		1.4686		3.56734	supercont2.1,+:265893-266021	exon5
								ANP00733	KVDQFNDIIK		2.4e-05	3	407.227	3	407.227	40.37	3.68589	-0.546536	-0.546536	supercont2.1,+:266037-266066	exon5
								ANP00734	VDQFNDIIK		0.00101786	2	546.291	2	546.291	33.32	2.17354	1.44721	1.44721	supercont2.1,+:266040-266066	exon5
								ANP00735	THLQDATPLTLGQEFSGYVSQLER		4.23e-16	3	897.457	3	897.457	48.3	3.52603	4.97965	4.97965	supercont2.1,+:266076-266147	exon5
								ANP00736	VENSLPDLR		0.000356429	2	521.782	2	521.782	33.42	2.4103	3.91415	3.91415	supercont2.1,+:266160-266186	exon5
								ANP00737	LLAQGGTAVGTGINTFK		3.7e-16	2	824.455	2	824.455	92.14	4.54576	-2.61475	-2.91431	supercont2.1,+:266187-266237	exon5
								ANP00738	GFDEAIADEVSK		2.35e-09	2	640.803	2	640.803	42.83	2.64389	-1.97338	-1.97338	supercont2.1,+:266238-266273	exon5
								ANP00739	TSPNKFEVLAAHDAVVEASGALNTLAASLFK		3.62e-16	3	1057.9	3	1057.9	78.32	5.48357	-1.02477	-1.02477	supercont2.1,+:266295-266387	exon5
								ANP00740	FEVLAAHDAVVEASGALNTLAASLFK		2.83e-16	2	1322.71	2	1322.71	110.59	6.56149	3.99964	3.99964	supercont2.1,+:266310-266387	exon5
								ANP00742	CGLGELQLPENEPGSSIMPGK	C1(Carboxymethyl)	3.7e-16	2	1107.52	2	1107.52	63.73	3.7613	-2.63729	-2.63729	supercont2.1,+:266427-266489	exon5
								ANP00743	NLLHSVR		0.00206274	2	419.749	2	419.749	29.26	1.61892	1.90493	1.90493	supercont2.1,+:266619-266639	exon5
								ANP00744	ILSDGMK		0.00919495	1	763.401	1	763.401	43.16	1.30476	-1.61804	-1.61804	supercont2.1,+:266640-266660	exon5
								ANP00745	NLVVGLEADR		7.42e-08	2	543.301	2	543.301	53.63	2.59106	-0.679684	-0.679684	supercont2.1,+:266673-266702	exon5
								ANP00746	RIESILHESLMLVTCLNPVIGYDMASK	C15(Carboxymethyl)	3.82e-16	3	1030.86	3	1030.86	88.28	5.28482	4.08334	1.65476	supercont2.1,+:266706-266858	exon5-6
								ANP00747	IESILHESLMLVTCLNPVIGYDMASK	C14(Carboxymethyl)	8.07e-09	3	978.83	3	978.83	51.83	3.87563	3.48999	3.48999	supercont2.1,+:266709-266858	exon5-6
								ANP00749	HVRPELMISPK		0.00123679	3	436.248	3	436.248	14	2.44706	-0.375529	-0.375529	supercont2.1,+:266946-266978	exon6
TERG_00104T0	212	23.7	5.2	Trichophyton_rubrum_CBS_118892_glucosamine_6-phosphate_N-acetyltransferase_(213_aa)	11	0.7736	supercont2.1,+:268819-269534	ANP00751	AIETSSTTVPVAVTNNCIDTK	C17(Carboxymethyl)	1.64e-10	2	1111.55			61.23		-0.463982		supercont2.1,+:268822-268884	exon1
								ANP00753	EVEPAVTEATKPNSEEEK		0.00258534			3	662.99		2.4719		3.0531	supercont2.1,+:268906-268959	exon1
								ANP00754	EVEPAVTEATKPNSEEEKTEEGLFSASYISPEVVSLLPENYTLRPLR		6.32e-14	4	1312.92	4	1312.92	120.92	5.27905	1.42438	1.42438	supercont2.1,+:268906-269046	exon1
								ANP00755	TEEGLFSASYISPEVVSLLPENYTLRPLR		4.75e-12	3	1094.24	3	1094.24	74.36	3.53845	-0.989287	-0.989287	supercont2.1,+:268960-269046	exon1
								ANP00756	SDYQNGFLDVLSVLTK		8.5e-16	2	899.966	2	899.966	81.13	4.73977	0.860307	0.860307	supercont2.1,+:269050-269097	exon1
								ANP00757	VGEFTPELWNER		1.13e-07	2	738.858	2	738.858	57.98	2.8505	-1.67497	-1.75866	supercont2.1,+:269098-269133	exon1
								ANP00758	VVGTGSLIVER		5.52e-09	2	565.332	2	565.332	79.61	3.03702	-0.852543	-0.852543	supercont2.1,+:269200-269232	exon1
								ANP00759	FIHAAGLVGHIEDIAIESGQQGK		3.17e-16	3	797.42	3	797.42	57.3	4.48139	-0.501075	-0.501075	supercont2.1,+:269236-269304	exon1
								ANP00760	MIHALDYVAK		0.00012511	3	387.544	3	387.544	30.29	3.03756	3.57372	3.57372	supercont2.1,+:269320-269349	exon1
								ANP00761	SILDCSEANEGFYLK	C5(Carboxymethyl)	1.31e-08	2	873.901	2	873.901	98.36	4.02958	3.18428	3.84175	supercont2.1,+:269445-269489	exon2
								ANP00762	AGLEMAHYY		0.000180776	2	527.739	2	527.739	31.25	1.94599	4.08728	4.08728	supercont2.1,+:269505-269531	exon2
TERG_00105T0	63	7	11.77	Trichophyton_rubrum_CBS_118892_hypothetical_protein_(64_aa)	4	0.3175	supercont2.1,-:270537-270990	ANP00763	MNPNPGAA		0.00184066	1	771.347	1	771.347	47.51	1.39224	1.79381	1.79381	supercont2.1,-:270540-270563	exon3
								ANP00764	KMNPNPGAA		0.00466979	1	899.443	1	899.443	30.2	1.34248	3.4733	3.4733	supercont2.1,-:270540-270638	exon2-3
								ANP00765	FVNVTMTGGK		1.57e-06	2	527.272	2	527.272	42.33	2.04062	-2.20052	-2.20052	supercont2.1,-:270642-270671	exon2
								ANP00766	RFVNVTMTGGK		2.31e-05	2	605.323	2	605.323	49.05	2.54325	-1.23328	-1.95046	supercont2.1,-:270642-270674	exon2
TERG_00106T0	160	18	11.39	Trichophyton_rubrum_CBS_118892_60S_ribosomal_protein_L24a_(161_aa)	6	0.2875	supercont2.1,-:271798-272593	ANP00767	AIVGASLDVIK		1.35e-07	2	543.331	2	543.331	67.02	3.44304	-0.695098	-0.123313	supercont2.1,-:272008-272040	exon3
								ANP00768	GLSEEVAK		0.00931591	1	832.442	1	832.442	28.41	1.50279	0.108617	0.650049	supercont2.1,-:272074-272288	exon2-3
								ANP00769	KGLSEEVAK		4.59e-05	2	480.772	2	480.772	57.23	3.1513	0.483285	0.483285	supercont2.1,-:272074-272291	exon2-3
								ANP00770	IAWTILYR		7.46e-11	2	518.305	2	518.305	46.68	2.77045	3.78746	3.78746	supercont2.1,-:272304-272327	exon2
								ANP00772	SESLFLQR		0.000104276	2	490.265	2	490.265	65.25	2.85655	2.51636	2.51636	supercont2.1,-:272343-272366	exon2
								ANP00773	TYDDSFSGQK		3.53e-05	1	1147.49	1	1147.49	33.5	2.12851	1.93972	1.93972	supercont2.1,-:272558-272587	exon1
TERG_00107T0	150	17.1	6.95	Trichophyton_rubrum_CBS_118892_ubiquitin_conjugating_enzyme_(151_aa)	8	0.7533	supercont2.1,-:273152-273829	ANP00774	WKEDEPAAIQTAR		4.04e-07	2	757.885	2	757.885	60.03	4.17307	1.27287	1.27287	supercont2.1,-:273182-273220	exon4
								ANP00775	TILLSIQALLGAPNPDDPLANDVAQR		2.75e-11	3	905.827	3	905.827	72.05	3.86912	0.0356848	0.0356848	supercont2.1,-:273221-273298	exon4
								ANP00776	NNWSPALQIR		0.000321052	2	599.82	2	599.82	37.32	2.40147	0.0667571	0.0667571	supercont2.1,-:273299-273398	exon3-4
								ANP00777	ICLDVLK	C2(Carboxymethyl)	0.00203163	2	431.241	2	431.241	29.13	2.08953	-0.358228	-0.358228	supercont2.1,-:273399-273419	exon3
								ANP00778	IYHPNIDR		0.00614173	3	343.183	3	343.183	18.86	1.68516	1.30498	1.66785	supercont2.1,-:273429-273452	exon3
								ANP00779	LELFLPEDYPMTPPK		1.98e-08	2	895.46	2	895.46	76.01	3.68414	2.66216	2.66216	supercont2.1,-:273471-273515	exon3
								ANP00780	IHGPTQSPYEGGIFK		5.53e-05	2	815.914	2	815.914	43.83	3.49087	1.50998	-0.760575	supercont2.1,-:273516-273631	exon2-3
								ANP00782	LMAEPVPGINAVPHEDNLR		3e-12	2	1036.53	2	1036.53	57.46	4.14981	-1.34494	-1.34494	supercont2.1,-:273647-273787	exon1-2
TERG_00109T0	290	33.2	9.58	Trichophyton_rubrum_CBS_118892_hypothetical_protein_(291_aa)	5	0.231	supercont2.1,-:279703-280648	ANP00784	ALFVYPK		0.00403804	2	419.248	2	419.248	34.74	2.01967	2.37675	2.37675	supercont2.1,-:279739-279759	exon2
								ANP00786	DQYIIIEAK		0.000251944	2	546.8	2	546.8	24.34	2.01499	-0.944177	-0.944177	supercont2.1,-:279847-279873	exon2
								ANP00787	TGVTANLNISYK		0.000348951	2	640.845	2	640.845	36.25	2.2536	-1.76844	-1.76844	supercont2.1,-:279889-279924	exon2
								ANP00788	SVLYLGNGLDGWPTVVHGGTIATILDENMGR		1.91e-12	3	1085.89	3	1085.89	73.48	4.73823	0.525303	0.525303	supercont2.1,-:279952-280044	exon2
								ANP00789	FDQLEIVK		0.000164928	2	496.279	2	496.279	60.58	2.48494	4.60354	4.60354	supercont2.1,-:280274-280297	exon1
TERG_00110T0	567	64.2	5.96	Trichophyton_rubrum_CBS_118892_ubiquitin_C-terminal_hydrolase_(568_aa)	22	0.5573	supercont2.1,-:281058-282893	ANP00791	AIDLPTADILNE		6.18e-07	2	642.837	2	642.837	48.21	2.87337	-1.62327	-1.62327	supercont2.1,-:281061-281096	exon3
								ANP00792	VSEVPAENIETLSGGGESHSALILLYK		3.33e-06	3	938.493	3	938.493	54.04	2.7129	4.00543	3.02322	supercont2.1,-:281097-281236	exon2-3
								ANP00793	EEDGNWWWFNDEK		1.42e-07	2	877.856	2	877.856	86.69	3.33868	-0.86867	-2.55555	supercont2.1,-:281237-281275	exon2
								ANP00794	GVITHQGASADSGHYTAYVK		2.68e-12	2	1031.5	2	1031.5	82.2	3.64239	0.0830327	0.0830327	supercont2.1,-:281309-281368	exon2
								ANP00795	QELFSLINEDLAK		1.06e-07	2	760.4	2	760.4	60.64	3.22328	-4.70138	-4.70138	supercont2.1,-:281408-281446	exon2
								ANP00796	EQEEKEEDRASEPLQK		3.61e-05	2	972.966	2	972.966	52.15	2.83981	4.87628	4.87628	supercont2.1,-:281576-281623	exon2
								ANP00797	EIRKDEQDMER		0.000994781	3	483.567	3	483.567	30.47	1.78435	3.71419	3.71419	supercont2.1,-:281657-281689	exon2
								ANP00798	VTFPQEIDVVDFCTDELKK	C13(Carboxymethyl)	1.79e-07	2	1142.56	2	1142.56	71.97	3.36564	-0.854418	-0.854418	supercont2.1,-:281720-281776	exon2
								ANP00799	KVTFPQEIDVVDFCTDELKK	C14(Carboxymethyl)	7.86e-07	3	804.736	3	804.736	25.56	3.1311	-2.95476	-2.95476	supercont2.1,-:281720-281779	exon2
								ANP00800	VTFPQEIDVVDFCTDELK	C13(Carboxymethyl)	4.23e-16	2	1078.51	2	1078.51	72.07	3.16893	5.07755	5.07755	supercont2.1,-:281723-281776	exon2
								ANP00801	YLTVHFVR		0.000362292	3	345.532	3	345.532	32.74	1.50206	2.33084	2.33084	supercont2.1,-:281825-281848	exon2
								ANP00802	EINHLHDGIMASLEEK		3.89e-08	3	612.636	3	612.636	42.86	3.25541	-1.26811	-1.26811	supercont2.1,-:281924-281971	exon2
								ANP00804	EGGEMAVESSDVFFK		6.74e-09	2	816.364	2	816.364	51.87	2.59304	-3.09115	-3.09115	supercont2.1,-:281993-282037	exon2
								ANP00806	DGNGYAQQDAEEAWSQIISQLR		5.74e-13	2	1240.07	2	1240.07	107.82	4.43703	-2.9901	-2.9901	supercont2.1,-:282158-282223	exon2
								ANP00807	TVFPQFAQQSR		0.000292369	2	654.84	2	654.84	23.66	2.20224	2.77586	2.77586	supercont2.1,-:282224-282256	exon2
								ANP00808	STGQNSSSPFNSGWPDLTASLR		4.2e-12	2	1155.04	2	1155.04	88.57	5.31753	-3.18665	-3.18665	supercont2.1,-:282326-282391	exon2
								ANP00809	LIPELQEELQK		5.98e-05	2	670.375	2	670.375	17.19	1.38047	-3.37777	-3.37777	supercont2.1,-:282398-282430	exon2
								ANP00810	ADGATPAGLSNLGNTCYLNSTLQTLR	C16(Carboxymethyl)	7.49e-10	2	1355.16	2	1355.16	91.85	4.2396	-4.43042	-4.43042	supercont2.1,-:282431-282508	exon2
								ANP00812	EAIKFLEDMTEAEVAK		0.000177731	2	912.462	2	912.462	28.7	3.25169	4.42862	4.42862	supercont2.1,-:282509-282556	exon2
								ANP00813	AGQTFMMMGTPANGESNLALR	N-Term(Acetyl); M6(Oxidation); M7(Oxidation); M8(Oxidation)	0.00262745			2	1144.01		1.64132		-0.613733	supercont2.1,-:282566-282628	exon2
								ANP00814	YEVELDPSSNGETFK		1.62e-10	2	857.892	2	857.892	71.23	3.26159	-2.74196	-2.74196	supercont2.1,-:282734-282778	exon2
								ANP00815	RYEVELDPSSNGETFK		1.9e-05	2	935.941	2	935.941	44.91	3.09847	-4.05066	-4.05066	supercont2.1,-:282734-282781	exon2
TERG_00111T0	169	19.5	7.56	Trichophyton_rubrum_CBS_118892_ARP2/3_complex_20_kDa_subunit_(170_aa)	10	0.7692	supercont2.1,+:283307-284078	ANP00816	SQSLRPYLQCVR	N-Term(Acetyl); C10(Carboxymethyl)	0.000393011	2	775.394			41.88		1.64589		supercont2.1,+:283366-283401	exon2
								ANP00817	SSLTAALAVSNFASQTSER		1.33e-15	2	970.487	2	970.487	104.65	3.99462	-2.57664	-2.70365	supercont2.1,+:283402-283458	exon2
								ANP00818	HNVPEIEAATSPELLLNPLTVAR		5.53e-09	2	1242.68	2	1242.68	80.2	5.01744	1.67001	1.67001	supercont2.1,+:283459-283527	exon2
								ANP00819	VLIEPSVNSVR		1.13e-05	2	606.851	2	606.851	36.3	2.51571	0.534797	0.534797	supercont2.1,+:283543-283575	exon2
								ANP00820	IKQADEIEHILVHK		1.7e-05	4	418.989	4	418.989	18.65	2.56118	-2.29873	-2.29873	supercont2.1,+:283588-283629	exon2
								ANP00821	QADEIEHILVHK		1.47e-05	2	716.385	2	716.385	38.9	2.36913	1.96456	1.96456	supercont2.1,+:283594-283629	exon2
								ANP00822	AEAFFILR		1.01e-05	2	483.773	2	483.773	56.6	2.6097	-1.50493	-1.50493	supercont2.1,+:283654-283677	exon2
								ANP00823	GYDISFLITNFHTEAMLK		5.4e-11	2	1050.53	2	1050.53	95.1	4.86326	-0.212638	-0.212638	supercont2.1,+:283753-283806	exon3
								ANP00824	LVDFIIEFMEEVDK		9.37e-09	2	863.936	2	863.936	94.1	3.98363	2.06311	2.06311	supercont2.1,+:283813-283854	exon3
								ANP00825	FVAESFLTPFD		9.52e-07	2	636.811	2	636.811	45.01	1.97544	-0.347457	-0.347457	supercont2.1,+:283983-284075	exon4-5
TERG_00113T0	341	37.4	7.11	Trichophyton_rubrum_CBS_118892_hypothetical_protein_(342_aa)	1	0.0704	supercont2.1,-:288773-289913	ANP00828	SSGLGLESIIGYIENDGLPEATAR		2.35e-06	2	1231.63	2	1231.63	46.8	3.03972	4.7821	4.7821	supercont2.1,-:289064-289135	exon2
TERG_00121T0	353	38.7	8.35	Trichophyton_rubrum_CBS_118892_FAD_dependent_oxidoreductase_(354_aa)	6	0.2493	supercont2.1,-:317420-318606	ANP00834	GFETSWGIAEDVQR		5.52e-06	2	797.88	2	797.88	50.82	2.84162	2.0841	2.0841	supercont2.1,-:317468-317509	exon3
								ANP00835	GQTCLIAETATK	C4(Carboxymethyl)	2.46e-07	2	647.321	2	647.321	51.4	3.00999	-0.304635	-0.304635	supercont2.1,-:317819-317922	exon2-3
								ANP00836	LQSVEEAFCLEGYK	C9(Carboxymethyl)	1.96e-06	2	837.388	2	837.388	48.3	3.17762	-2.84398	-2.84398	supercont2.1,-:317986-318027	exon2
								ANP00837	YESFIVEPDTYCFHLLR	C12(Carboxymethyl)	1.77e-05	2	1095.52	2	1095.52	28.75	2.11203	1.96636	1.96636	supercont2.1,-:318067-318117	exon2
								ANP00838	LLEGPEKPAGVEFAAR		4.23e-16	3	561.976	3	561.976	40.26	3.29695	4.38245	4.38245	supercont2.1,-:318118-318165	exon2
								ANP00839	FLEGIEYVSGPAAEK		1.16e-14	2	805.407	2	805.407	58.04	3.31549	-2.02684	-2.02684	supercont2.1,-:318211-318255	exon2
TERG_00122T0	215	23.6	5.78	Trichophyton_rubrum_CBS_118892_hypothetical_protein_(216_aa)	12	0.6651	supercont2.1,+:319715-320575	ANP00840	HVFSSNSPVQFSQVLVESLQSSSETDASR		2.5e-11	3	1051.51	3	1051.51	74.2	5.67176	-3.00893	-3.00893	supercont2.1,+:319763-320062	exon1-3
								ANP00841	SQSLELHIQAR		5.74e-05	2	641.348	2	641.348	61.75	3.01919	-1.49337	-1.49337	supercont2.1,+:320063-320095	exon3
								ANP00842	VAEELNR		0.00250728	2	415.723	2	415.723	46.61	2.21127	2.3955	2.3955	supercont2.1,+:320096-320116	exon3
								ANP00843	ETQTLADIEKR		0.00156306	2	652.348	2	652.348	42.42	2.75554	2.42772	2.42772	supercont2.1,+:320129-320161	exon3
								ANP00844	IAASYPSEGPATAK		9.12e-08	2	681.849	2	681.849	52.21	3.18244	1.14878	1.14878	supercont2.1,+:320162-320203	exon3
								ANP00845	SNISTLASQPLSLESPR		8.13e-10	2	900.479	2	900.479	78.4	3.66493	0.225356	0.225356	supercont2.1,+:320204-320254	exon3
								ANP00846	VPFAGTEFDR		0.00115586	2	569.781	2	569.781	38.87	2.51182	1.82621	1.82621	supercont2.1,+:320255-320284	exon3
								ANP00847	VPFAGTEFDRVPATSAPAESSDEAAAINPK		5.89e-15	3	1015.83	3	1015.83	83.17	4.70258	-4.62016	-0.992386	supercont2.1,+:320255-320344	exon3
								ANP00848	VPATSAPAESSDEAAAINPK		1.11e-13	2	963.476	2	963.476	97.18	2.86566	-0.610014	-0.610014	supercont2.1,+:320285-320344	exon3
								ANP00849	ESLASRPTIR		0.00348435	2	565.32	2	565.32	19.13	2.19376	0.807191	0.807191	supercont2.1,+:320390-320419	exon3
								ANP00851	RPLDCWQEVDTFK	C5(Carboxymethyl)	1.67e-08	3	565.599	3	565.599	22.52	1.91001	-1.97561	-1.97561	supercont2.1,+:320486-320524	exon3
								ANP00852	RPLDCWQEVDTFKR	C5(Carboxymethyl)	5.87e-08	3	617.633	3	617.633	55.28	3.70306	-1.31178	-1.31178	supercont2.1,+:320486-320527	exon3
TERG_00124T0	168	17.9	5.96	Trichophyton_rubrum_CBS_118892_hypothetical_protein_(169_aa)	14	0.9345	supercont2.1,-:323812-324652	ANP00854	VTYAENEPSIPNVTVSGVDAILATL		1.54e-10	3	858.45	3	858.45	54.76	3.45724	0.345097	0.345097	supercont2.1,-:323815-323952	exon4-5
								ANP00855	YAMVIDNGK		1.48e-05	2	505.753	2	505.753	34.92	3.05295	-1.46126	1.0607	supercont2.1,-:323953-323979	exon4
								ANP00856	FSSAFGWTAHEGR		6.02e-16	2	726.838	2	726.838	78.33	2.63934	2.14385	2.14385	supercont2.1,-:323989-324027	exon4
								ANP00857	ANGVTGDDILFLSDSDSK		4.23e-16	2	927.442	2	927.442	80.08	3.48523	0.315564	0.315564	supercont2.1,-:324028-324163	exon3-4
								ANP00858	GVDIVAFVAYNDPFVMSAWGK		3.16e-11	2	1143.57	2	1143.57	75.12	4.86739	0.233354	0.233354	supercont2.1,-:324164-324226	exon3
								ANP00859	VVLVSVPGAFTPTCSATHLPDYIAKLCALK	C14(Carboxymethyl); C27(Carboxymethyl)	0.00105998	4	808.427	4	808.427	17.94	1.98374	-3.24862	0.667751	supercont2.1,-:324233-324385	exon2-3
								ANP00860	VVLVSVPGAFTPTCSATHLPDYIAK	C14(Carboxymethyl)	1.34e-08	2	1322.69	2	1322.69	64.2	3.05586	-2.38431	-1.05391	supercont2.1,-:324248-324385	exon2-3
								ANP00861	KVVLVSVPGAFTPTCSATHLPDYIAK	C15(Carboxymethyl)	3.57e-16	3	924.826	3	924.826	73.75	4.58047	0.122859	0.122859	supercont2.1,-:324248-324388	exon2-3
								ANP00862	GFSTCGAPVPYDASK	C5(Carboxymethyl)	4.96e-08	2	779.352	2	779.352	53.59	3.47477	4.9176	4.9176	supercont2.1,-:324404-324448	exon2
								ANP00863	KGFSTCGAPVPYDASK	C6(Carboxymethyl)	5.01e-08	2	843.394	2	843.394	37.87	2.9094	-2.37366	-2.37366	supercont2.1,-:324404-324451	exon2
								ANP00864	YIPWTEEK		0.00447063	2	533.266	2	533.266	31.3	1.02321	0.254888	0.254888	supercont2.1,-:324452-324475	exon2
								ANP00865	SGDAFPSGVLFKYIPWTEEK		1.74e-07	2	1136.07	2	1136.07	61.41	2.87024	2.07469	2.07469	supercont2.1,-:324452-324637	exon1-2
								ANP00866	SGDAFPSGVLFK		1.32e-08	2	612.819	2	612.819	30.11	2.36011	3.88029	3.88029	supercont2.1,-:324602-324637	exon1
								ANP00867	PALKSGDAFPSGVLFK		0.00595751	3	545.301			19.44		-3.15987		supercont2.1,-:324602-324649	exon1
TERG_00125T0	493	53.5	5.12	Trichophyton_rubrum_CBS_118892_glucokinase_(494_aa)	16	0.5578	supercont2.1,-:325156-326707	ANP00868	DGSGVGAALGALVAK		2.87e-10	2	643.358	2	643.358	88.7	3.38628	-2.33032	-2.33032	supercont2.1,-:325183-325227	exon2
								ANP00869	LATDEVVDIGVDGSLIEHYPGFEGYIR		4.74e-07	3	988.828	3	988.828	32.37	2.24073	2.30172	2.30172	supercont2.1,-:325297-325377	exon2
								ANP00870	LGAIALGAIVISSGR		9.54e-09	2	699.427	2	699.427	80.17	3.99062	-0.958268	-0.958268	supercont2.1,-:325378-325422	exon2
								ANP00871	DLGIMDVSTSDCQAVK	C12(Carboxymethyl)	6.64e-10	2	870.395	2	870.395	66.2	2.83756	0.538859	0.538859	supercont2.1,-:325459-325506	exon2
								ANP00872	ISGMFLGEILR		6.92e-09	2	618.344	2	618.344	65.82	3.80046	-1.23835	-1.23835	supercont2.1,-:325681-325713	exon2
								ANP00873	VLPNTEFDIQLDNETFNPGIQMFEK		1e-08	2	1470.21	2	1470.21	85.62	2.34273	-0.97293	-0.97293	supercont2.1,-:325717-325791	exon2
								ANP00874	SASEMVINAEWGSFDNSLK		2.37e-10	2	1042.98	2	1042.98	74.93	4.56397	1.09619	1.09619	supercont2.1,-:325792-325848	exon2
								ANP00875	TLIGAIFGTGTNGAYVEK		3.82e-16	2	906.481	2	906.481	50.26	4.07864	0.358977	0.358977	supercont2.1,-:325900-325953	exon2
								ANP00876	VAALINDTVGTLMAR		1.07e-10	2	772.929	2	772.929	73.45	4.1812	2.97359	2.97359	supercont2.1,-:325981-326025	exon2
								ANP00877	DICQLLQTAIDELKLPVR	C3(Carboxymethyl)	9.94e-12	2	1063.58	2	1063.58	90.73	4.44888	3.55472	3.55472	supercont2.1,-:326026-326079	exon2
								ANP00878	DICQLLQTAIDELK	C3(Carboxymethyl)	6.6e-11	2	830.924	2	830.924	35.16	2.8849	0.506755	0.506755	supercont2.1,-:326038-326079	exon2
								ANP00880	EPYAEEQVFDLGFTFSFPVIQHGINK		8.13e-08	3	1004.83	3	1004.83	58.34	3.04949	-1.17575	-1.17575	supercont2.1,-:326134-326211	exon2
								ANP00881	ELMVAEHGVELFNFLAK		0.000387461	3	649.676	3	649.676	18.72	2.51361	3.89079	3.89079	supercont2.1,-:326293-326343	exon2
								ANP00882	VCSVHLHGNSTHEMIQSK	C2(Carboxymethyl)	2.89e-08	2	1032.98	2	1032.98	59.99	3.45668	1.71412	1.71412	supercont2.1,-:326359-326412	exon2
								ANP00883	ENSGLSQIPSYITSVPDGTEK		3.83e-09	2	1111.54	2	1111.54	74.56	3.05417	-0.0264508	-0.0264508	supercont2.1,-:326525-326587	exon1
								ANP00884	ISAGFEYSTEELNK		3.65e-08	2	794.377	2	794.377	43.63	3.64422	-4.76999	-4.76999	supercont2.1,-:326633-326674	exon1
TERG_00126T0	533	58.1	7.87	Trichophyton_rubrum_CBS_118892_C2H2_finger_domain-containing_protein_(534_aa)	2	0.0919	supercont2.1,-:327642-329243	ANP00885	QPEGYGDTSGGYTKPQSEENYMTSSNSVAR		0.000693492	3	1080.8	3	1080.8	33.74	2.80891	-2.57348	-2.57348	supercont2.1,-:328833-328922	exon1
								ANP00886	NLLDDSSAALEFISAFNSR		5.96e-10	2	1035.51	2	1035.51	62.27	4.11378	-1.28784	-1.28784	supercont2.1,-:329052-329108	exon1
TERG_00130T0	521	57.6	4.89	Trichophyton_rubrum_CBS_118892_rab_geranylgeranyl_transferase_escort_protein_(522_aa)	3	0.1036	supercont2.1,-:335187-337107	ANP00887	GSHDNVFSFPAPALDLAFDDALIDQVK		1.04e-07	3	968.147	3	968.147	35.03	3.35742	-0.0332351	-0.0332351	supercont2.1,-:335295-335375	exon4
								ANP00888	VVLENAVDNFLK		1.29e-07	2	680.876	2	680.876	49.85	3.24604	-1.12331	-1.12331	supercont2.1,-:335469-335504	exon4
								ANP00891	YVVGSGWDLPEQIQR		1.11e-08	2	873.944	2	873.944	41.55	3.59647	-0.636735	-0.636735	supercont2.1,-:335963-336007	exon3
TERG_00131T0	161	17.7	7.5	Trichophyton_rubrum_CBS_118892_peptidyl-prolyl_cis-trans_isomerase_(162_aa)	5	0.4534	supercont2.1,-:337886-338502	ANP00894	TGAEDRPVDQVK		0.000580127	2	657.837	2	657.837	36.63	2.13104	1.93974	1.93974	supercont2.1,-:337925-337960	exon3
								ANP00895	HTGAGVLSMANSGPNTNGSQFFITLAPTPWLDGK		0.000174157			3	1162.91		2.57852		0.400085	supercont2.1,-:338024-338125	exon3
								ANP00896	FEDEINPSLK		0.00108485	2	596.299	2	596.299	23.72	2.05835	0.649496	0.649496	supercont2.1,-:338126-338155	exon3
								ANP00897	GGSSIFGEKFEDEINPSLK		2.72e-08	2	1027.51	2	1027.51	64.04	3.07015	-1.87951	-1.87951	supercont2.1,-:338126-338182	exon3
								ANP00899	NFSTLAQR		0.00971844	2	468.75	2	468.75	20.22	1.62492	2.86136	2.86136	supercont2.1,-:338264-338287	exon3
TERG_00132T0	609	68.2	5.96	Trichophyton_rubrum_CBS_118892_signal_peptide_peptidase_(610_aa)	3	0.0657	supercont2.1,+:338926-340755	ANP00900	EHREEDDTDEAVVQK		0.0018093	3	600.608	3	600.608	11.84	2.01375	3.55313	3.55313	supercont2.1,+:339100-339144	exon1
								ANP00903	ELGGEIK		0.00880263			2	373.208		1.42139		0.606909	supercont2.1,+:340630-340650	exon1
								ANP00904	LVSTPQPSTNSSPILVAK		3.42e-08	2	920.013	2	920.013	77.83	3.60463	-2.22116	-2.22116	supercont2.1,+:340651-340704	exon1
TERG_00133T0	415	45.1	5.12	Trichophyton_rubrum_CBS_118892_3'_exoribonuclease_(416_aa)	4	0.188	supercont2.1,-:340963-342210	ANP00905	WVLADPDAFEESLCPER	C14(Carboxymethyl)	3.64e-10	2	1017.96	2	1017.96	78.87	4.00814	-2.31336	-2.31336	supercont2.1,-:341122-341172	exon1
								ANP00906	APETTNEDIEMDDGNDDSTQTTAK		1.44e-08	2	1299.54	2	1299.54	88.9	4.22577	3.97295	3.97295	supercont2.1,-:341524-341595	exon1
								ANP00907	LLSLLHSSNLIR		8.17e-05	3	455.943	3	455.943	18.89	1.4698	-4.15726	-4.15726	supercont2.1,-:341638-341673	exon1
								ANP00908	TDTQFRPASVSTGSLTHTNGGAVVR		2.29e-10	3	853.768	3	853.768	53.66	5.00605	-0.936697	-0.936697	supercont2.1,-:341965-342039	exon1
TERG_00139T0	212	23.3	5.3	Trichophyton_rubrum_CBS_118892_MADS_box_transcription_factor_(213_aa)	2	0.1509	supercont2.1,-:353392-354349	ANP00914	LQPLVTQSEGK		0.00182253	2	600.336	2	600.336	20.13	1.73923	1.28416	1.28416	supercont2.1,-:353851-353883	exon2
								ANP00916	KRPRPAADDDDDDDDKPGRER		0.00366471	5	488.633	5	488.633	24.83	2.64318	3.94734	3.94734	supercont2.1,-:354188-354250	exon1
TERG_00140T0	394	42.4	6.24	Trichophyton_rubrum_CBS_118892_hypothetical_protein_(395_aa)	5	0.1802	supercont2.1,-:355720-356966	ANP00917	LLEIFNGGVENIR		2.25e-06	2	737.408	2	737.408	45.22	3.90205	1.42308	1.42308	supercont2.1,-:355945-355983	exon2
								ANP00918	VFPGSSSVASYTIDQMTGK		0.00358448			2	987.977		1.93923		-0.748303	supercont2.1,-:355990-356046	exon2
								ANP00919	HGVLYPAADKPR		2.9e-05	3	441.911	3	441.911	14.09	1.84528	0.685714	0.685714	supercont2.1,-:356236-356271	exon2
								ANP00920	FVLMPDLGSDLIR		2.12e-06	2	738.398	2	738.4	41.36	2.77417	-0.571739	-2.74861	supercont2.1,-:356347-356385	exon2
								ANP00921	DNGEFTHLGDFMFK		0.000529367	2	829.373	2	829.373	11.95	1.88546	4.62348	4.62348	supercont2.1,-:356464-356505	exon2
TERG_00142T0	232	26	8.91	Trichophyton_rubrum_CBS_118892_vacuolar_ATP_synthase_subunit_E_(233_aa)	12	0.5733	supercont2.1,+:360486-361326	ANP00923	SQSHALSDDQVAGELR	N-Term(Acetyl)	8.33e-13	2	877.917			58.42		-2.49993		supercont2.1,+:360489-360618	exon1-2
								ANP00924	ADEEFAIEK		0.00011952	2	526.25	2	526.25	40.72	2.87721	-1.04499	-1.04499	supercont2.1,+:360679-360705	exon2
								ANP00925	QEIASIDQLYEK		6.07e-08	2	718.866	2	718.866	47.04	2.96532	-1.51152	-1.51152	supercont2.1,+:360721-360756	exon2
								ANP00928	QQLLDELFER		2.35e-06	2	645.838	2	645.838	43.97	2.31307	0.167923	0.167923	supercont2.1,+:360841-360870	exon2
								ANP00929	ARGEVTTAATGK		6.86e-05	2	581.316	2	581.316	46.69	3.07969	2.09057	2.09057	supercont2.1,+:360871-360906	exon2
								ANP00930	GEVTTAATGK		1.72e-05	2	467.747	2	467.747	52.54	1.72181	2.60424	2.60424	supercont2.1,+:360877-360906	exon2
								ANP00931	TLAGLILEGLYALNESK		2.64e-13	2	903.006	2	903.006	109.43	5.56666	-0.563463	-0.563463	supercont2.1,+:360928-360978	exon2
								ANP00932	KADYAAVR		0.001044	2	447.246	2	447.246	36.52	2.47332	1.27154	1.27154	supercont2.1,+:360997-361020	exon2
								ANP00933	EATVEIDER		0.000231938	2	531.26	2	531.26	36.58	1.73306	1.66963	1.66963	supercont2.1,+:361069-361095	exon2
								ANP00934	EPLAQDSAGGVIILGSNGK		1.77e-10	2	913.489	2	913.489	106.38	3.84964	2.95962	2.95962	supercont2.1,+:361096-361212	exon2-3
								ANP00935	IEYNNTLEER		3.86e-05	2	640.808	2	640.808	52.58	2.52014	-1.94928	-1.94928	supercont2.1,+:361213-361242	exon3
								ANP00936	LLEADSLPTVR		6.41e-08	2	607.345	2	607.345	43.31	2.97185	3.28185	3.28185	supercont2.1,+:361249-361281	exon3
TERG_00146T0	1488	167.2	7.55	Trichophyton_rubrum_CBS_118892_phospholipid-translocating_P-type_ATPase_(1489_aa)	7	0.0746	supercont2.1,+:367457-372157	ANP00938	AVVQFGSEDESNVSKPSK		2.13e-05	2	954.475			58.65		3.81933		supercont2.1,+:367460-367513	exon1
								ANP00940	LVGWNNVNSTEDNVSLWR		8.75e-12	2	1052.01	2	1052.01	74.82	3.73285	-4.11835	-4.11835	supercont2.1,+:368136-368189	exon2
								ANP00941	SWNISDDLGQIEYIFSDK		1.66e-13	2	1065.5	2	1065.5	87.68	4.26503	-4.47796	-4.47796	supercont2.1,+:369345-369398	exon2
								ANP00942	AQSPDEAALVSTAR		8.21e-05	2	708.361	2	708.361	51.04	2.53508	2.18419	2.18419	supercont2.1,+:369780-369821	exon2
								ANP00945	NHEPPAATHALVIDGETLK		2.9e-08	3	671.682	3	671.682	45.45	2.34225	-4.22047	-4.22047	supercont2.1,+:370518-370574	exon2
								ANP00947	QAVMSSDYAIGQFR		0.000618613	2	786.879	2	786.879	30.08	1.77062	2.3778	2.3778	supercont2.1,+:370797-370838	exon2
								ANP00948	VSLAVPQLYK		0.00158882	2	559.333	2	559.333	28.46	2.37888	-1.8353	-1.8353	supercont2.1,+:371138-371167	exon3
TERG_00147T0	2196	244.7	8.24	Trichophyton_rubrum_CBS_118892_tRNA-splicing_endonuclease_(2197_aa)	12	0.0974	supercont2.1,+:373316-380209	ANP00950	ASMLSIFEALSSTPVLGNDTFLR		4.99e-05	3	823.76	3	823.76	17.77	3.05988	-1.94434	-1.94434	supercont2.1,+:373916-373984	exon2
								ANP00951	ASSPPFDPDFVDSLWR		2.16e-07	2	918.43	2	918.43	32.24	1.91816	-4.20149	-4.20149	supercont2.1,+:374195-374242	exon2
								ANP00952	LSVDHLGIQAPALR		0.000135626	3	497.289	3	497.289	30.75	3.17816	3.2309	3.2309	supercont2.1,+:374324-374365	exon2
								ANP00953	SVINTIHALLK		0.000450187	2	604.874	2	604.874	22.57	2.09992	4.26447	4.26447	supercont2.1,+:374366-374398	exon2
								ANP00954	GSVATIVLSEMMEVISDNIK		9.3e-10	2	1068.55	2	1068.55	62.35	4.957	-2.8668	-1.72081	supercont2.1,+:374744-374803	exon2
								ANP00955	DNTLQHGVSTYTAPIWDAVVQHLDEK		8.47e-10	3	979.821	3	979.821	62.65	4.52088	3.49322	3.49322	supercont2.1,+:374939-375016	exon2
								ANP00957	LGDLDATVQEEALDVIK		9.36e-07	2	914.985	2	914.985	50.37	3.05514	4.42276	4.42276	supercont2.1,+:375854-375904	exon2
								ANP00958	TILATYDLNPAQAK		3.7e-05	2	759.914	2	759.914	40.34	2.86414	3.36165	3.36165	supercont2.1,+:377288-377329	exon2
								ANP00959	SAVDNDAFTLIQGPPGSGK		7.93e-10	2	937.465	2	937.465	73.17	3.72328	-3.55488	-3.55488	supercont2.1,+:377339-377458	exon2-3
								ANP00960	TIVAIVGALLTPILAER		6.3e-10	3	584.033	3	584.033	49.66	3.98277	0.630188	0.630188	supercont2.1,+:377465-377515	exon3
								ANP00961	LLVCAPSNAAVDELVMR	C4(Carboxymethyl)	5.22e-06	2	929.976	2	929.976	28.69	2.38173	2.66572	2.66572	supercont2.1,+:377582-377632	exon3
								ANP00962	SDAINANVLDVTLDELVNAK		7.5e-14	2	1057.55	2	1057.55	95.16	5.05484	0.60255	0.60255	supercont2.1,+:377699-377758	exon3
TERG_00152T0	601	66.8	9.07	Trichophyton_rubrum_CBS_118892_inner_membrane_magnesium_transporter_MRS2_(602_aa)	3	0.0998	supercont2.1,-:391335-393266	ANP00972	AEAQEPIQEETIHETEPLSSAAR		4.09e-05	3	846.075	3	846.075	15.82	2.20557	-2.73823	1.62381	supercont2.1,-:391338-391406	exon3
								ANP00973	GAASPPVPPTVSPAAVAANK		3.81e-08	2	901.493	2	901.493	56.34	3.45878	-1.31168	-1.31168	supercont2.1,-:391452-391511	exon3
								ANP00975	AEHDHQEVEMLLESYHK		1.4e-07	4	524.497	4	524.497	31.35	3.30854	4.68955	4.68955	supercont2.1,-:392032-392082	exon2
TERG_00153T0	644	67	9.89	Trichophyton_rubrum_CBS_118892_actin_associated_protein_Wsp1_(645_aa)	1	0.0373	supercont2.1,-:393707-395796	ANP00978	WIYTGLQGAAVLANDLVGHTFWIK		6.49e-05	3	891.812	3	891.812	17.58	1.56525	1.11692	1.11692	supercont2.1,-:395602-395673	exon1
TERG_00154T0	184	20.8	9.96	Trichophyton_rubrum_CBS_118892_hypothetical_protein_(185_aa)	3	0.2011	supercont2.1,-:396663-397217	ANP00980	LTKPILTPMFDYK		0.000299514	3	522.959	3	522.959	11.7	2.51052	1.14209	1.14209	supercont2.1,-:397047-397085	exon1
								ANP00981	YAAGNIESPFTK		0.000174811	2	649.326	2	649.326	43.17	1.86508	2.60739	2.60739	supercont2.1,-:397095-397130	exon1
								ANP00982	NLKPFEWNLGLK		7.72e-07	3	486.94	3	486.94	39.64	3.37035	-3.96264	-3.96264	supercont2.1,-:397167-397202	exon1
TERG_00155T0	149	17.1	5.17	Trichophyton_rubrum_CBS_118892_eukaryotic_translation_initiation_factor_1A_(150_aa)	6	0.4228	supercont2.1,+:397916-398590	ANP00983	ELTFKEEGQEYAQVVK		5.75e-05	2	949.485	2	949.485	27.57	2.66875	4.29052	4.29052	supercont2.1,+:398155-398202	exon2
								ANP00984	EEGQEYAQVVK		1.69e-05	2	640.312	2	640.312	30.87	2.40848	0.66271	1.53375	supercont2.1,+:398170-398202	exon2
								ANP00985	LEALCFDGEK	C5(Carboxymethyl)	0.00474958	2	591.773	2	591.773	34.28	1.75829	3.47231	3.47231	supercont2.1,+:398221-398250	exon2
								ANP00986	LEALCFDGEKR	C5(Carboxymethyl)	0.00325985	3	446.885	3	446.885	20.37	1.92499	3.11666	3.11666	supercont2.1,+:398221-398253	exon2
								ANP00987	VWINQGDIILLSLR		1.15e-10	2	820.479	2	820.479	62.52	3.46128	-1.223	-1.223	supercont2.1,+:398287-398328	exon2
								ANP00990	INETDTYGHEGIEDNVEFDEDR		2.27e-12	2	1299.05	2	1299.05	73.51	5.21521	1.0336	1.0336	supercont2.1,+:398425-398548	exon2-3
TERG_00156T0	973	109.1	6.23	Trichophyton_rubrum_CBS_118892_DNA_repair_protein_RAD1_(974_aa)	1	0.0164	supercont2.1,-:399285-402676	ANP00992	LSLPLQYQQNLLNELR		5.4e-09	2	971.538	2	971.538	62.75	3.44863	-3.15611	-3.15611	supercont2.1,-:402539-402643	exon1-2
TERG_00157T0	440	46.9	4.91	Trichophyton_rubrum_CBS_118892_chitin_biosynthesis_protein_(441_aa)	11	0.4341	supercont2.1,+:403224-404644	ANP00993	LIEFPSVLLPR		4.7e-06	2	642.389	2	642.389	39.46	2.07473	-1.53271	-1.53271	supercont2.1,+:403293-403423	exon1-2
								ANP00994	ILNTYGINTPSPPVLR		6.18e-08	2	877.992	2	877.992	61.1	3.30348	-1.95784	-1.95784	supercont2.1,+:403520-403567	exon2
								ANP00995	NATQTSLVLEWDPIQLATASLK		2.27e-13	2	1200.15	2	1200.15	102.81	5.4536	4.61864	4.61864	supercont2.1,+:403574-403639	exon2
								ANP00996	MTDLSGITVTAGILPDNLR		1.26e-08	2	994.033	2	994.033	47.28	4.00635	3.13191	3.13191	supercont2.1,+:403814-403870	exon2
								ANP00997	ESLANAVDR		0.00144259	2	487.75			33.47		3.6594		supercont2.1,+:403871-403897	exon2
								ANP00998	IDTTHFVCTEGR	C8(Carboxymethyl)	6.02e-05	3	479.555	3	479.555	16.74	1.72714	2.14224	2.14224	supercont2.1,+:403928-403963	exon2
								ANP00999	AVEMNIPVVRPEWVEGCER	C17(Carboxymethyl)	0.000411119	3	757.701			18.23		-0.706151		supercont2.1,+:403982-404038	exon2
								ANP01000	QIGPGVGAQQNK		0.00720054	2	598.824	2	598.824	18.18	1.79569	2.24517	2.24517	supercont2.1,+:404096-404131	exon2
								ANP01001	SSPENNQVPPVTPFPGGPR		1.34e-07	2	988.993	2	988.993	68.25	2.36451	-2.28996	-2.28996	supercont2.1,+:404192-404248	exon2
								ANP01002	SEVPNGLRPEGGSPPLPPPK		0.000211147	3	675.699	3	675.699	19.15	1.94364	3.48111	3.48111	supercont2.1,+:404249-404308	exon2
								ANP01003	ETGENSHTTADNDAATNDEDDRIPTNGQLDEK		1.23e-06	3	1158.5	3	1158.5	53.54	4.11336	3.33391	3.33391	supercont2.1,+:404393-404488	exon2
TERG_00162T0	558	59.9	8.85	Trichophyton_rubrum_CBS_118892_membrane_transporter_(559_aa)	4	0.1057	supercont2.1,-:413429-415454	ANP01008	SIVGAVLPLCGQR	C10(Carboxymethyl)	0.00103779	2	685.875	2	685.875	20.86	2.93824	-2.43526	-2.43526	supercont2.1,-:413567-413605	exon6
								ANP01009	DLFFQSIVRPTK		0.00102123			3	484.272		1.24362		-2.96702	supercont2.1,-:414215-414250	exon4
								ANP01010	LIQETGNTNLR		3.42e-05	2	629.843	2	629.843	41.38	2.93607	3.39032	3.39032	supercont2.1,-:414281-414313	exon4
								ANP01011	FLAGTAGSAPLTIGAGTISDMIR		1.93e-11	2	1110.59	2	1110.59	66.75	4.22818	-2.8499	-2.8499	supercont2.1,-:414592-414660	exon3
TERG_00164T0	236	26.3	8.75	Trichophyton_rubrum_CBS_118892_FAD_dependent_sulfhydryl_oxidase_Erv2_(237_aa)	3	0.1737	supercont2.1,+:420493-421376	ANP01012	APGHLVQQQQPIPK		4.14e-05	2	770.934	2	770.934	57.51	3.77548	1.31114	1.31114	supercont2.1,+:420607-420648	exon1
								ANP01013	YPEKPTGEEQR		0.000994107	2	667.325	2	667.325	32.3	2.14058	2.62274	2.62274	supercont2.1,+:420852-420884	exon2
								ANP01014	NAAAGWGCLVHNEVNR	C8(Carboxymethyl)	1.79e-08	2	884.916	2	884.916	45.45	3.27272	3.28563	3.28563	supercont2.1,+:421086-421133	exon3
TERG_00166T0	1100	120.4	7.78	Trichophyton_rubrum_CBS_118892_NF-X1_finger_transcription_factor_(1101_aa)	3	0.0536	supercont2.1,+:425328-428630	ANP01016	NQEETWIGSFTCPDICGR	C12(Carboxymethyl); C16(Carboxymethyl)	5.93e-12	2	1086.45	2	1086.45	82.7	4.90338	-0.724972	-0.724972	supercont2.1,+:426573-426626	exon1
								ANP01017	SCHPQDTLPSHCPTAPDMVSHCACGK	C2(Carboxymethyl); C12(Carboxymethyl); C22(Carboxymethyl); C24(Carboxymethyl)	1.08e-07	4	739.292	4	739.292	31.71	2.28451	-1.95949	-1.95949	supercont2.1,+:426660-426737	exon1
								ANP01018	QTDESDIEAEHICTR	C13(Carboxymethyl)	4.81e-07	2	902.89	2	902.89	69.98	2.61921	3.71821	3.71821	supercont2.1,+:427092-427136	exon1
TERG_00169T0	1090	118.7	7.23	Trichophyton_rubrum_CBS_118892_arid/bright_domain-containing_protein_(1091_aa)	2	0.056	supercont2.1,+:432933-436205	ANP01023	QPIPEEYTPLTFPEPVFHGPVIVDELFPLGDDLLR		1.94e-06	3	1330.69	3	1330.69	39.41	2.89298	0.0284726	0.0284726	supercont2.1,+:434775-434879	exon1
								ANP01024	AWLGSHDGFAISLVHLAGLLCTERPR	C21(Carboxymethyl)	7.57e-10	4	720.125	4	720.125	42.4	3.20103	-2.15204	-2.15204	supercont2.1,+:435864-435941	exon1
TERG_00170T0	175	19.6	10.93	Trichophyton_rubrum_CBS_118892_hypothetical_protein_(176_aa)	6	0.4971	supercont2.1,-:437324-438031	ANP01025	KPEVMQFLLDR		1.41e-06	2	688.373	2	688.373	40.02	3.63979	-1.81973	-1.81973	supercont2.1,-:437333-437365	exon3
								ANP01026	YLGLEAKPSEVYINQTNGHITIK		2.17e-13	3	863.465	3	863.465	49.5	6.14409	3.68772	3.68772	supercont2.1,-:437436-437504	exon2
								ANP01028	KTEGDLNALR		0.000532048	2	558.805	2	558.805	29.8	1.85255	2.16302	2.16302	supercont2.1,-:437520-437549	exon2
								ANP01029	TPSNQLPIYLVTK		1.14e-06	2	737.416	2	737.416	65.66	3.13647	-4.76351	-4.76351	supercont2.1,-:437583-437621	exon2
								ANP01030	RTPSNQLPIYLVTK		0.000385364	2	815.47	2	815.47	42.41	3.20687	0.0616269	0.0616269	supercont2.1,-:437583-437624	exon2
								ANP01031	SQASLQPQQSAPAGQADSLPLTNLPYFIR		1.25e-06	3	1033.53	3	1033.53	33.05	3.28182	-0.155188	-0.155188	supercont2.1,-:437625-437711	exon2
TERG_00171T0	455	52	5.2	Trichophyton_rubrum_CBS_118892_eukaryotic_translation_initiation_factor_3_subunit_E_(456_aa)	29	0.8615	supercont2.1,+:438496-439974	ANP01032	ADNAPTSANTLLK	N-Term(Acetyl)	6.6e-07	1	1357.7			48.29		-0.505464		supercont2.1,+:438499-438537	exon1
								ANP01033	DAAAQSAATADEVAK		1.7e-10	2	709.841	2	709.841	78.83	2.58454	-0.284663	-0.284663	supercont2.1,+:438538-438582	exon1
								ANP01034	QLIFPLLEFASNQEEDDEAIDQITK		2.19e-15	3	969.483	3	969.483	50.8	4.81882	1.7699	1.7699	supercont2.1,+:438625-438699	exon1
								ANP01035	SKYELLK		0.00883536	2	440.762	2	440.762	26.43	1.7022	4.1422	4.1422	supercont2.1,+:438700-438720	exon1
								ANP01036	HTNMADYIASLWQEINDSDTVPEEFVTK		1.11e-15	3	1085.17	3	1085.17	47.74	3.67587	-0.089787	-0.089787	supercont2.1,+:438721-438804	exon1
								ANP01037	LQHYVDASSK		6.36e-06	1	1147.58	1	1147.58	47.17	2.07277	1.49339	1.49339	supercont2.1,+:438826-438855	exon1
								ANP01038	ITELLQDDAVVGNLR		4.23e-16	2	828.454	2	828.454	74.71	4.31534	3.01065	3.01065	supercont2.1,+:438856-438900	exon1
								ANP01039	FLEEQHGATIEMVNTLYDFGR		3.25e-16	3	824.061	3	824.061	62.93	3.69232	-0.485341	-0.485341	supercont2.1,+:438925-438987	exon1
								ANP01040	FQYSCGSYGNAAELLYQFR	C5(Carboxymethyl)	2.77e-16	2	1138.01	2	1138.01	106.38	5.83109	-0.444684	-0.444684	supercont2.1,+:438988-439044	exon1
								ANP01041	VLSTDNDKVAAATWGK		2.34e-08	2	838.438	2	838.438	59	3.28864	1.82655	1.82655	supercont2.1,+:439045-439092	exon1
								ANP01042	VAAATWGK		0.00390641	2	402.224	2	402.224	26.52	2.01159	-0.433004	-0.433004	supercont2.1,+:439069-439092	exon1
								ANP01043	LACEILTTNWEGAMEEITK	C3(Carboxymethyl)	2.47e-13	2	1105.52	2	1105.52	105.02	4.18161	-2.15827	-2.15827	supercont2.1,+:439093-439149	exon1
								ANP01044	VKDSIDTR		0.00166013	2	467.254	2	467.254	42.63	2.33432	1.81863	1.81863	supercont2.1,+:439150-439173	exon1
								ANP01045	LFNNPLGQLQHR		1.24e-14	2	718.894	2	718.894	56.22	3.75987	2.95596	2.95596	supercont2.1,+:439174-439209	exon1
								ANP01046	SWLIHWSLFPFFNHEPAR		3.65e-07	3	762.053	3	762.053	24.97	3.35904	-0.496415	-0.496415	supercont2.1,+:439210-439263	exon1
								ANP01047	DVLTDMFFHPAYINTIQTACPWILR	C20(Carboxymethyl)	1.98e-09	3	1008.5	3	1008.5	42.83	3.36954	-0.47404	-0.47404	supercont2.1,+:439264-439338	exon1
								ANP01048	YLTAAVITNR		1.51e-08	2	561.318	2	561.318	61.6	2.71348	-2.4122	-2.4122	supercont2.1,+:439339-439368	exon1
								ANP01049	NSALYQK		0.00289728	1	823.433	1	823.433	37.14	2.34897	3.24288	3.24288	supercont2.1,+:439384-439404	exon1
								ANP01050	QEEYEYQDPITEFIK		3.85e-14	2	966.453	2	966.453	62.13	3.63945	3.79791	3.79791	supercont2.1,+:439435-439479	exon1
								ANP01051	ALYIDFDFEEAQK		2.35e-05	2	794.88	2	794.88	13.12	2.21552	0.276452	0.276452	supercont2.1,+:439480-439518	exon1
								ANP01052	KLGEAEEVLR		0.00168274	2	572.324	2	572.324	30.76	1.9659	4.0198	4.0198	supercont2.1,+:439519-439548	exon1
								ANP01053	LGEAEEVLR		5.85e-07	2	508.276	2	508.276	74.46	3.02293	3.06688	3.1893	supercont2.1,+:439522-439548	exon1
								ANP01054	SDFFLVAAADAFVESAR		4.02e-11	3	605.971	3	605.971	102.26	4.71304	3.32186	4.29875	supercont2.1,+:439549-439599	exon1
								ANP01055	HLISESYCK	C8(Carboxymethyl)	0.000565372	2	569.266	2	569.266	31.19	2.36051	0.644313	0.644313	supercont2.1,+:439600-439626	exon1
								ANP01056	IDINDLSTR		1.02e-05	2	523.779	2	523.779	56.59	2.64874	3.26924	3.26924	supercont2.1,+:439639-439720	exon1-2
								ANP01057	LGLSQNEGEK		1.95e-05	2	537.776	2	537.776	50.61	2.50093	1.63592	1.63592	supercont2.1,+:439721-439750	exon2
								ANP01058	WIVNLIR		0.000297356	2	457.284	2	457.284	32.43	2.20329	-1.66546	-1.66546	supercont2.1,+:439751-439771	exon2
								ANP01059	IDYQEGTVLMNHPPQSVYQQVIEK		4.23e-16	3	939.472	3	939.472	64.43	4.13481	0.973311	3.00116	supercont2.1,+:439793-439864	exon2
								ANP01060	TQVLSSAVAK		1.11e-05	2	502.293	2	502.293	34.64	2.25047	-0.110336	-0.482056	supercont2.1,+:439886-439971	exon2-3
TERG_00174T0	341	37.5	5.06	Trichophyton_rubrum_CBS_118892_anion-transporting_ATPase_(342_aa)	11	0.4663	supercont2.1,-:443741-444820	ANP01062	MPLLVEEVR		2.18e-05	2	543.306	2	543.306	50.05	2.30031	-1.32245	-1.32245	supercont2.1,-:443804-443830	exon2
								ANP01063	ELYEDFNVVR		7.29e-05	2	642.32	2	642.32	40.18	2.00958	4.4889	4.4889	supercont2.1,-:443831-443860	exon2
								ANP01064	DNACQQCGAR	C4(Carboxymethyl); C7(Carboxymethyl)	0.00984738	2	591.22	2	591.22	34.62	2.4718	1.65954	1.65954	supercont2.1,-:443897-443926	exon2
								ANP01065	ETIAEVNSQFK		3.29e-06	2	633.323	2	633.323	56.65	2.62933	0.875398	0.875398	supercont2.1,-:444071-444103	exon2
								ANP01066	GGLPNGQNLDDVLSK		6.43e-09	2	763.893	2	763.893	54.77	3.54619	-1.73875	-1.73875	supercont2.1,-:444119-444163	exon2
								ANP01067	LSQLSGQFGPMLNSVLGAR		1.82e-13	2	988.024	2	988.024	106.98	5.12323	-0.958407	-0.958407	supercont2.1,-:444164-444220	exon2
								ANP01068	FLQFPTVLEK		3.37e-06	2	611.347	2	611.347	35.6	1.60439	-1.15686	-1.15686	supercont2.1,-:444233-444262	exon2
								ANP01069	SLSYEVIVFDTAPTGHTLR		5.04e-10	2	1053.55	2	1053.55	89.54	4.42032	-1.49756	-1.49756	supercont2.1,-:444263-444319	exon2
								ANP01070	SVLLISTDPAHNLSDAFGQK		5.49e-13	2	1057.05	2	1057.05	103.33	4.83828	-1.129	-1.129	supercont2.1,-:444596-444655	exon1
								ANP01071	TTTSCSLAIQLSK	C5(Carboxymethyl)	2.27e-06	2	705.86	2	705.86	81.98	3.68159	-1.64274	-1.64274	supercont2.1,-:444665-444703	exon1
								ANP01072	SSTAVIGDDDVLEPTLQCLLDHK	N-Term(Acetyl); C18(Carboxymethyl)	5.91e-10	2	1285.12			60.81		-2.17878		supercont2.1,-:444749-444817	exon1
TERG_00176T0	203	22.7	5.43	Trichophyton_rubrum_CBS_118892_transthyretin_domain-containing_protein_(204_aa)	2	0.1773	supercont2.1,+:450857-451468	ANP01074	NWSSEGDSVSVSSTLAQLPNR		4.4e-13	2	1117.53	2	1117.53	101.39	4.96749	-3.66405	-3.66405	supercont2.1,+:451196-451258	exon1
								ANP01075	EQGVEDCFWPEVEVR	C7(Carboxymethyl)	4.38e-06	2	940.414	2	940.414	44.87	2.60979	2.65015	2.65015	supercont2.1,+:451325-451369	exon1
TERG_00178T0	1242	137.7	5.44	Trichophyton_rubrum_CBS_118892_hypothetical_protein_(1243_aa)	1	0.0097	supercont2.1,-:456114-459900	ANP01078	EAIENETMPIPK	N-Term(Acetyl)	0.00279172			2	707.352		1.65827		2.49142	supercont2.1,-:458079-458114	exon2
TERG_00179T0	350	38.6	4.86	Trichophyton_rubrum_CBS_118892_hypothetical_protein_(351_aa)	4	0.2086	supercont2.1,+:460959-462011	ANP01082	SAGGSSIADVSALTQSLLSQLTAQNAR		9.91e-09	3	882.798	3	882.798	59.16	4.17505	3.64021	3.64021	supercont2.1,+:461112-461192	exon1
								ANP01083	LSNSLNQLTDEIIR		1.07e-08	2	808.433	2	808.433	67.63	3.68332	-3.43978	-3.43978	supercont2.1,+:461193-461234	exon1
								ANP01086	QEDVHQEENEENESGTK		1.77e-05	3	667.948	3	667.948	18.33	2.68599	1.56214	1.56214	supercont2.1,+:461376-461426	exon1
								ANP01087	TQPEITQEDPEYISR		0.00420067			2	903.435		1.7305		3.96605	supercont2.1,+:461427-461471	exon1
TERG_00181T0	605	66.5	8.19	Trichophyton_rubrum_CBS_118892_nucleolar_protein_NOP58_(606_aa)	25	0.5917	supercont2.1,-:464148-466232	ANP01089	LVEEVEAEDEEMK		1.63e-10	2	775.351	2	775.351	74	3.74941	0.958971	0.958971	supercont2.1,-:464511-464549	exon3
								ANP01090	KYNTDADALAGNKPEK		5.04e-06	3	578.962	3	578.962	25.68	2.73928	3.7893	3.7893	supercont2.1,-:464586-464633	exon3
								ANP01091	GVAIAPNGVESAVPK		7.92e-08	2	704.893	2	704.893	67.23	2.7392	0.121803	0.121803	supercont2.1,-:464658-464702	exon3
								ANP01092	SALGMESR		0.00149083	2	425.708	2	425.708	25.58	1.96678	-0.417638	-0.417638	supercont2.1,-:464757-464780	exon3
								ANP01093	VDALSDWTADADGNEPTEEEK		3.52e-12	2	1146.49	2	1146.49	76.49	5.72529	-1.47381	-3.51339	supercont2.1,-:464781-464843	exon3
								ANP01094	YGLIYHASLIGQATGK		3.1e-10	2	846.457	2	846.457	71.64	4.97626	-2.64574	-2.64574	supercont2.1,-:464898-464945	exon3
								ANP01095	SPASTIQILGAEK		3.84e-09	2	657.869	2	657.869	64.81	3.73075	3.06417	3.06417	supercont2.1,-:464988-465026	exon3
								ANP01096	LIAHAGSLMNLSK		3.06e-10	2	677.877	2	677.877	51.84	3.19841	-2.78072	-2.78072	supercont2.1,-:465027-465065	exon3
								ANP01097	MAAIAPNLTALVGDLVGAR		2.75e-16	2	927.02	2	927.02	92.7	4.68787	0.182295	0.182295	supercont2.1,-:465066-465122	exon3
								ANP01098	QQLANYLSAR		3.8e-07	2	582.315	2	582.315	59.52	2.70274	4.87257	4.87257	supercont2.1,-:465123-465152	exon3
								ANP01099	SMGTEISNEDLENIQSLAEQVVAFSEYR		3.67e-11	3	1053.83	3	1053.83	106.57	3.79277	-2.09571	3.08584	supercont2.1,-:465153-465236	exon3
								ANP01100	SDSETTDLSEILPEEIETAVK		6e-16	2	1153.56	2	1153.56	56.46	4.36095	-3.35179	-3.35179	supercont2.1,-:465252-465314	exon3
								ANP01101	ILNDNLAYAK		0.00198142	2	567.812	2	567.812	33.27	2.2576	0.339426	0.339426	supercont2.1,-:465339-465368	exon3
								ANP01102	EWYGWHFPELAK		3.64e-08	2	781.876	2	781.876	43.65	3.00254	0.7851	0.7851	supercont2.1,-:465369-465404	exon3
								ANP01103	VKEWYGWHFPELAK		0.000598031	2	895.457	2	895.457	47.4	3.1364	0.375028	0.375028	supercont2.1,-:465369-465410	exon3
								ANP01104	IDTMIVQAISLLDDLDKELNTYAMR		2.37e-12	3	961.159	3	961.159	83.62	3.85813	-1.99516	-1.99516	supercont2.1,-:465411-465485	exon3
								ANP01105	IDTMIVQAISLLDDLDK		3.17e-16	2	952.008	2	952.008	82.52	4.1057	-1.96154	-0.537218	supercont2.1,-:465435-465485	exon3
								ANP01106	FSADKIDTMIVQAISLLDDLDK		2.43e-10	2	1226.14	2	1226.14	107.17	5.25077	-1.10528	-0.704089	supercont2.1,-:465435-465500	exon3
								ANP01107	AHLPTLIPGLVPSDISTMSLGLSHSLAR		9.23e-11	3	961.866	3	961.866	51.22	3.09779	2.93638	2.93638	supercont2.1,-:465513-465596	exon3
								ANP01108	LPGLSIQPIADGTTAELYR		8.46e-15	2	1008.04	2	1008.04	95.2	4.72776	-0.678819	-0.678819	supercont2.1,-:465606-465662	exon3
								ANP01111	VTPSLANLLEK		4.27e-05	2	592.846	2	592.846	45.72	1.84787	-3.07514	-3.07514	supercont2.1,-:465831-465863	exon2
								ANP01112	FDSATTALEEVASVIDGK		7.05e-16	2	926.962	2	926.962	129.67	4.49196	-0.417225	-0.417225	supercont2.1,-:465864-465917	exon2
								ANP01113	DDLATETETAEGISNLMK		3.97e-13	2	969.451	2	969.451	126.77	4.85315	-3.05395	-3.05395	supercont2.1,-:465936-466154	exon1-2
								ANP01114	RDDLATETETAEGISNLMK		1.3e-13	2	1047.5	2	1047.5	115.92	4.60572	-2.49352	-2.49352	supercont2.1,-:465936-466157	exon1-2
								ANP01115	TLFILTETSAGYALLK		9.87e-10	2	870.995			81.6		2.07616		supercont2.1,-:466182-466229	exon1
TERG_00182T0	358	40.4	4.81	Trichophyton_rubrum_CBS_118892_vacuolar_ATP_synthase_subunit_D_(359_aa)	15	0.6117	supercont2.1,+:466577-467878	ANP01116	NNLLNSQNYSNLTQCDTVDDVK	C15(Carboxymethyl)	2.12e-11	2	1278.58	2	1278.58	84.89	5.46606	-0.798299	-0.798299	supercont2.1,+:466694-466868	exon2-3
								ANP01117	LQLGPSYGDFLAALPPNPSTSALAGK		7.84e-10	2	1293.18	2	1293.18	58.68	4.73698	0.0117916	-0.653652	supercont2.1,+:466869-466946	exon3
								ANP01119	YLQAQASGSTAK		2.6e-08	2	612.814	2	612.814	69.15	3.02025	-0.452448	-0.351258	supercont2.1,+:466977-467012	exon3
								ANP01121	GSLSHQDLDELNIEIIR		3.69e-12	2	976.51	2	976.51	102.69	4.52902	-3.82934	-3.82934	supercont2.1,+:467223-467273	exon3
								ANP01122	NYLEDFYR		3.02e-06	2	560.261	2	560.261	13.48	1.15968	3.63449	3.63449	supercont2.1,+:467289-467312	exon3
								ANP01123	FINSDPELK		0.000624926	2	531.777	2	531.777	48.38	2.57528	0.961142	0.961142	supercont2.1,+:467313-467339	exon3
								ANP01124	DSPTSQVMCEALEFEADR	C9(Carboxymethyl)	7.21e-10	2	1043.44	2	1043.44	83.47	3.37466	-0.485445	-0.485445	supercont2.1,+:467340-467393	exon3
								ANP01125	AINITLNSFGTELSK		1.09e-09	2	804.434	2	804.434	73.86	3.32905	-2.17616	-2.17616	supercont2.1,+:467397-467441	exon3
								ANP01126	KLYPEFGK		0.0071979	3	327.852	3	327.852	25.87	2.61625	-0.213333	-0.213333	supercont2.1,+:467454-467477	exon3
								ANP01127	LYPEGSLMLSR		0.00135667	2	633.332	2	633.332	17.14	1.924	0.814865	0.814865	supercont2.1,+:467478-467510	exon3
								ANP01128	ADDLEGVSLAVTVVADYK		1.41e-09	2	932.98	2	932.98	50.95	2.91968	-1.14307	-0.283978	supercont2.1,+:467511-467564	exon3
								ANP01129	AFFDTVGLNQSGSGAGSEGK		1.64e-14	2	964.952	2	964.952	99.04	4.99601	-1.38125	-1.38125	supercont2.1,+:467565-467624	exon3
								ANP01130	SLEDLFYQR		2.51e-05	2	585.795	2	585.795	44.04	2.1312	2.98839	2.98839	supercont2.1,+:467625-467651	exon3
								ANP01133	QFTPAIIYAWVK		2.09e-06	2	718.901	2	718.901	32.74	2.66603	0.205532	0.205532	supercont2.1,+:467685-467720	exon3
								ANP01134	NITWIAECIAQNQK	C8(Carboxymethyl)	5.42e-16	2	845.417	2	845.417	52.01	3.27253	4.10642	0.400119	supercont2.1,+:467804-467845	exon4
TERG_00184T0	446	48.5	8.37	Trichophyton_rubrum_CBS_118892_ribose-phosphate_pyrophosphokinase_(447_aa)	14	0.435	supercont2.1,-:469057-470566	ANP01135	LEVLEVGQVFAEAIR		4.9e-13	2	836.966	2	836.966	115.07	4.78123	-1.77855	-1.77855	supercont2.1,-:469105-469246	exon2-3
								ANP01137	VVVTNTVSQENNLK		7.26e-10	2	772.918	2	772.918	41.16	3.78486	1.12409	1.12409	supercont2.1,-:469259-469300	exon2
								ANP01138	INASALDK		0.00957651	1	831.458	1	831.458	24.1	1.86341	1.11498	1.11498	supercont2.1,-:469301-469324	exon2
								ANP01139	VYALVTHGIFSGDAIDR		9.2e-11	2	917.478	2	917.478	72.93	4.62464	0.0998016	0.0998016	supercont2.1,-:469325-469375	exon2
								ANP01140	TAILIDDLADTSNTITR		3.25e-16	2	916.982	2	916.982	112.99	3.72127	-1.72127	-1.72127	supercont2.1,-:469412-469462	exon2
								ANP01141	QNATMMLVGDIK		2.93e-05	2	660.838	2	660.838	38.3	2.61419	3.17485	3.17485	supercont2.1,-:469469-469504	exon2
								ANP01144	YIQQNIPNFHEAVIVSPDAGGAKR		0.00140836			4	656.848		2.22389		4.95627	supercont2.1,-:469658-469729	exon1
								ANP01145	YIQQNIPNFHEAVIVSPDAGGAK		2.93e-11	2	1234.63	2	1234.63	78.58	4.20548	-1.22304	-1.22304	supercont2.1,-:469661-469729	exon1
								ANP01146	IPTSHSDETANNASNTLK		1.28e-10	2	950.455	2	950.455	94.3	5.17344	-0.063175	-0.063175	supercont2.1,-:469916-469969	exon1
								ANP01147	GLAQVQLNDLENAGSLNK		3.27e-11	2	942.492	2	942.492	84.4	4.01247	-2.74515	-2.74515	supercont2.1,-:470054-470107	exon1
								ANP01149	DVYIIQSGGGK		1.38e-05	2	568.801	2	568.801	50.59	2.66535	1.08328	0.755824	supercont2.1,-:470378-470410	exon1
								ANP01150	VEINESIR		0.000515912			2	480.262		1.95792		0.50959	supercont2.1,-:470417-470440	exon1
								ANP01152	QLGIPPVNVLLTK		2.03e-05	2	696.436	2	696.436	30.81	2.10599	2.11561	2.11561	supercont2.1,-:470462-470500	exon1
								ANP01153	NLVVLGGSSHPQLNATICR	C18(Carboxymethyl)	4.11e-17	2	1019.03	2	1019.03	129.02	4.12996	-0.776067	-0.776067	supercont2.1,-:470501-470557	exon1
TERG_00186T0	203	22.5	7.8	Trichophyton_rubrum_CBS_118892_phosphatidylinositol_N-acetylglucosaminyltransferase_(204_aa)	1	0.0985	supercont2.1,+:472783-473536	ANP01154	GLGVQTSTSSATYFPSATTR		8.64e-12	2	1016.5	2	1016.5	61.97	3.52273	-1.40618	-1.40618	supercont2.1,+:473195-473254	exon2
TERG_00187T0	614	69.2	8	Trichophyton_rubrum_CBS_118892_tRNA_pseudouridine_synthase_(615_aa)	13	0.3371	supercont2.1,-:473612-475456	ANP01155	IDELLAGTLLESMANR		1.16e-10	2	873.46	2	873.46	66.14	3.52041	1.27989	1.27989	supercont2.1,-:473867-473914	exon1
								ANP01156	KIDELLAGTLLESMANR		1.54e-08	2	937.506	2	937.506	72.54	4.0888	-0.517801	-0.517801	supercont2.1,-:473867-473917	exon1
								ANP01157	TDGNFGQGGLVEDLWTLWR		5.81e-09	2	1082.53	2	1082.53	33.25	2.08613	1.61324	1.61324	supercont2.1,-:473924-473980	exon1
								ANP01158	NTGVPGSINDINSAAGK		8.06e-05	2	807.911	2	807.911	36.21	3.03604	3.67181	3.67181	supercont2.1,-:474251-474301	exon1
								ANP01159	TPLGFVQMPGFEPFENGPR		4.23e-16	2	1060.52	2	1060.52	58.82	3.90863	2.69738	2.69738	supercont2.1,-:474302-474358	exon1
								ANP01161	EGWLDIEAMR		1.64e-05	2	610.291	2	610.291	34.88	1.78331	-2.21613	-2.21613	supercont2.1,-:474488-474517	exon1
								ANP01162	YFFTQPAFCPTPGTR	C9(Carboxymethyl)	3.23e-08	2	895.915	2	895.915	23.22	2.72264	-1.63943	1.27889	supercont2.1,-:474572-474616	exon1
								ANP01163	GWDDIADELPYIQILNGALPEDIR		6.16e-07	2	1363.69	2	1363.69	65.55	4.34791	0.959416	0.959416	supercont2.1,-:474689-474760	exon1
								ANP01164	GGDVVNSVVATESGMGDK		6.92e-09	2	861.405	2	861.405	52.8	3.50798	0.521317	0.521317	supercont2.1,-:474800-474853	exon1
								ANP01165	SLRPAEPNPPVELK		0.000441743	3	516.291	3	516.291	20.38	2.07529	2.16136	0.484644	supercont2.1,-:474854-474895	exon1
								ANP01166	GVSAFGQVIGIR		1.46e-08	2	602.345	2	602.345	64	2.47721	-2.06405	-2.06405	supercont2.1,-:474902-474937	exon1
								ANP01167	YNGLEHANGNYTEVPTIEEELWK		7.54e-06	3	902.763	3	902.763	10.82	2.37561	2.7664	2.7664	supercont2.1,-:475079-475147	exon1
								ANP01168	QLNQCPQNAVSIPSTECLK	C5(Carboxymethyl); C17(Carboxymethyl)	5.27e-09	2	1095.01	2	1095.01	68.71	2.92429	-0.876	-0.876	supercont2.1,-:475319-475375	exon1
TERG_00189T0	289	31.3	4.84	Trichophyton_rubrum_CBS_118892_40S_ribosomal_protein_S0_(290_aa)	11	0.5779	supercont2.1,-:477973-478915	ANP01169	DPEAEETK		0.000868689	2	459.708	2	459.708	30.79	1.59996	3.19511	3.19511	supercont2.1,-:478195-478218	exon2
								ANP01171	HAIGLVWWMLAR		1.95e-08	2	726.9	2	726.9	50.29	3.56069	-0.573745	-0.573745	supercont2.1,-:478297-478332	exon2
								ANP01173	EASYVNIPVIALCDADSPTEFVDVAIPTNNK	C13(Carboxymethyl)	4.23e-16	2	1682.33	2	1682.33	83.12	4.61991	4.14007	4.14007	supercont2.1,-:478339-478431	exon2
								ANP01174	TDAQAIK		0.00254694	2	373.706	2	373.706	35.41	2.16101	2.78533	2.78533	supercont2.1,-:478432-478452	exon2
								ANP01175	LIVVTDPR		1.87e-05	2	456.778	2	456.778	27.55	2.3639	-3.64472	-3.64472	supercont2.1,-:478453-478476	exon2
								ANP01176	FTPGSFTNYITR		7.26e-12	2	702.354	2	702.354	62.28	1.74289	3.73675	3.73675	supercont2.1,-:478495-478530	exon2
								ANP01177	FAAHTGAVAIAGR		1.67e-13	2	621.342	2	621.342	77.86	3.98621	-1.01979	0.776194	supercont2.1,-:478531-478569	exon2
								ANP01178	IIAAIDNPADICVISARPYGQR	C12(Carboxymethyl)	0.000137476	3	805.422	3	805.422	26.66	2.07798	0.165	0.165	supercont2.1,-:478582-478647	exon2
								ANP01180	TRPDGVNVINIGK		4.27e-08	2	691.89	2	691.89	60.38	2.60618	-1.90723	-1.90723	supercont2.1,-:478751-478789	exon1
								ANP01181	NMQTHMEPYLWK		3.77e-08	2	789.368	2	789.368	58.21	3.36009	3.2441	3.2441	supercont2.1,-:478790-478825	exon1
								ANP01182	APSNLPPVFNATSQDMEMMLTAQCHLGSK	C24(Carboxymethyl)	5e-14	3	1059.49			81.7		-1.52807		supercont2.1,-:478826-478912	exon1
TERG_00190T0	307	34.4	10.52	Trichophyton_rubrum_CBS_118892_ribosomal_protein_S15_(308_aa)	9	0.4821	supercont2.1,+:479295-480283	ANP01183	DPFAIAQAR		0.000491296	2	494.765	2	494.765	35.78	2.9378	3.45341	3.45341	supercont2.1,+:479480-479506	exon2
								ANP01184	TEAFGDPVASEK		0.00372381	2	625.799	2	625.799	40.37	2.28943	3.08868	0	supercont2.1,+:479558-479593	exon2
								ANP01185	TPMIEAMLNPSLYPTLGSK		1.68e-06	2	1032.04	2	1032.04	39.18	4.25232	4.63597	4.63597	supercont2.1,+:479594-479650	exon2
								ANP01186	GVHVPPDNEQSSYVNYCISK	C17(Carboxymethyl)	8.37e-11	3	765.35	3	765.35	57.02	3.96622	-2.33293	-2.33293	supercont2.1,+:479651-479710	exon2
								ANP01187	QLTRPVPPIDGSVVDPQQVEDAIK		4.23e-16	3	867.804	3	867.804	41.89	3.64732	3.52312	3.52312	supercont2.1,+:479744-479815	exon2
								ANP01189	VLPPKPAAAGQDPASLEPSAK		1.23e-09	2	1022.56	2	1022.56	73.92	2.9514	3.80401	3.80401	supercont2.1,+:479954-480016	exon2
								ANP01190	AGPDTGSPEVQVAILTSK		6.99e-13	2	885.468	2	885.468	77.66	3.26503	0.188939	0.188939	supercont2.1,+:480026-480079	exon2
								ANP01191	ILVLAEQLK		0.000666434	1	1026.66	1	1026.66	42.16	1.86254	4.84012	4.84012	supercont2.1,+:480080-480106	exon2
								ANP01193	WQNLMQTLGLSDAAWK		4.23e-16	2	931.47	2	931.47	68.27	3.06653	3.34323	3.34323	supercont2.1,+:480215-480262	exon2
TERG_00192T0	656	72.4	9.44	Trichophyton_rubrum_CBS_118892_ATP-dependent_rRNA_helicase_spb4_(657_aa)	2	0.0671	supercont2.1,-:484959-487056	ANP01196	TGLFSASVSEAVDQIVR		4.23e-09	2	889.966	2	889.966	65.48	3.31365	-1.87098	-1.87098	supercont2.1,-:486258-486308	exon2
								ANP01198	SSTLTVIPQLLLGGTTTPAQDLSVFLK		2.05e-07	2	1400.78	2	1400.78	25.25	4.03033	-3.38938	-3.38938	supercont2.1,-:486492-486572	exon2
TERG_00193T0	388	42.2	9.8	Trichophyton_rubrum_CBS_118892_phosphatidate_cytidylyltransferase_(389_aa)	1	0.0206	supercont2.1,+:487911-489077	ANP01200	HRFPAVNR		0.00325067	3	332.856	3	332.856	25.26	2.35565	3.55409	3.55409	supercont2.1,+:488472-488495	exon1
TERG_00195T0	571	63.6	7.2	Trichophyton_rubrum_CBS_118892_hypothetical_protein_(572_aa)	1	0.0193	supercont2.1,+:492798-494513	ANP01201	ILDDVSALVEK		0.00278723			2	601.338		1.88169		1.35501	supercont2.1,+:494052-494084	exon1
TERG_00201T0	863	97.5	4.93	Trichophyton_rubrum_CBS_118892_golgi_complex_component_Cog3_(864_aa)	5	0.1367	supercont2.1,-:510885-514468	ANP01205	FGDWTDSIFRPK		2.23e-05	3	490.244	3	490.244	17.15	2.76779	-2.66622	-2.66622	supercont2.1,-:512010-512045	exon5
								ANP01206	ETLVSAVQDTVTQLYEDYLEAYAAAEAGK		2.84e-13	3	1050.18	3	1050.18	89.76	5.69593	-0.621176	-0.621176	supercont2.1,-:512112-512198	exon5
								ANP01207	TVINDFTNTFATK		0.000118898	2	736.375	2	736.375	31.7	1.51006	0.121221	0.121221	supercont2.1,-:512358-512396	exon5
								ANP01208	TWIQLVGGGLLPQVVENMLDAK		7.65e-12	2	1191.15	2	1191.15	73.3	5.87391	-3.00298	-3.00298	supercont2.1,-:512421-512486	exon5
								ANP01211	YQSCLDDLELTTCHLDSLLQDTSHTLDVLSTLSQSFEAVEDR	C4(Carboxymethyl); C13(Carboxymethyl)	3.46e-06	4	1215.06	4	1215.06	38.53	3.67119	-1.86114	-1.86114	supercont2.1,-:514122-514321	exon1-2
TERG_00204T0	396	44.3	5.49	Trichophyton_rubrum_CBS_118892_mannitol-1-phosphate_dehydrogenase_(397_aa)	24	0.7854	supercont2.1,-:518742-519993	ANP01213	LTGLEPDHPLYDR		5.81e-07	2	763.386	2	763.386	38.06	2.93199	-0.173416	-0.173416	supercont2.1,-:518866-518904	exon1
								ANP01214	ILREENCESATQK	C7(Carboxymethyl)	1.72e-05	2	789.875	2	789.875	52.97	3.58099	0.464225	0.464225	supercont2.1,-:518905-518943	exon1
								ANP01215	FQNVSGDDESTELAK		1.01e-09	2	820.375	2	820.375	63.09	4.25988	1.81591	-0.668073	supercont2.1,-:518944-518988	exon1
								ANP01216	VDALMGAVEQALR		2.74e-09	2	686.865	2	686.865	77.75	4.46334	-1.81103	-1.81103	supercont2.1,-:518989-519027	exon1
								ANP01217	FIGPASQLAER		1.63e-07	2	594.823	2	594.823	73.56	2.64994	0.662804	0.662804	supercont2.1,-:519037-519069	exon1
								ANP01218	ISNPYLEDVVER		1.41e-08	2	717.365	2	717.365	88.95	2.20604	-2.96209	-2.96209	supercont2.1,-:519112-519147	exon1
								ANP01219	AYVNAIIER		4.34e-06	2	524.793	2	524.793	64.86	2.51674	-0.0703591	-0.0703591	supercont2.1,-:519148-519174	exon1
								ANP01220	HGIPEEEQR		2.89e-05	2	547.765	2	547.765	51.03	2.34414	0.40473	0.40473	supercont2.1,-:519175-519201	exon1
								ANP01221	MVDDALSETSR		4.37e-08	2	612.283	2	612.283	68.73	2.73066	1.40725	1.40725	supercont2.1,-:519217-519249	exon1
								ANP01222	KMVDDALSETSR		0.00794762	2	676.332	2	676.332	18.72	1.76567	2.92015	2.92015	supercont2.1,-:519217-519252	exon1
								ANP01223	TIYDALSDPR		2.74e-06	2	575.792	2	575.792	59.94	3.13942	1.81391	1.81391	supercont2.1,-:519259-519288	exon1
								ANP01224	LYTVNTGHATAAYYGYNSGK		5.35e-13	2	1076.01	2	1076.01	81.87	4.96792	-1.59441	-1.59441	supercont2.1,-:519292-519351	exon1
								ANP01225	KLYTVNTGHATAAYYGYNSGK		2.64e-10	3	760.375	3	760.375	60.49	3.92776	0.24453	0.24453	supercont2.1,-:519292-519354	exon1
								ANP01226	AIHWVDNLEPYIER		3.77e-10	2	877.949	2	877.949	31.18	2.40725	2.55564	2.55564	supercont2.1,-:519355-519396	exon1
								ANP01227	FYEWAVDQTPFGDWGHPDIK		1.05e-11	2	1204.55	2	1204.55	61.41	4.55481	1.78418	1.78418	supercont2.1,-:519397-519456	exon1
								ANP01228	IVPTQDPDAGLNVK		9.41e-08	2	733.899	2	733.899	41.05	2.16508	3.7561	3.7561	supercont2.1,-:519466-519507	exon1
								ANP01229	FANSAIDR		0.000222249	2	447.227	2	447.227	46.24	2.90764	-0.189712	-0.189712	supercont2.1,-:519508-519531	exon1
								ANP01230	TIERPLAVIACENAIGATDSLASFIK	C11(Carboxymethyl)	1.26e-12	2	1381.23	2	1381.23	83.05	4.62196	0.159091	0.159091	supercont2.1,-:519580-519657	exon1
								ANP01231	FIASPIAK		0.00481881	1	846.511	1	846.511	33.32	1.91295	3.10935	3.10935	supercont2.1,-:519673-519696	exon1
								ANP01232	EISTAEVVTCAVGPNILK	C10(Carboxymethyl)	2.11e-12	2	951.497	2	951.497	99.49	3.9449	-1.4098	-1.4098	supercont2.1,-:519697-519750	exon1
								ANP01233	YNMEDVIR		2.57e-05	2	520.248	2	520.248	44.07	2.22807	0.804608	0.685075	supercont2.1,-:519751-519774	exon1
								ANP01234	SESYTVTEISSAGENVK		4.23e-16	2	900.932	2	900.932	83.48	4.00486	3.73076	3.73076	supercont2.1,-:519808-519858	exon1
								ANP01235	GFVAEFLHESDYEVVFIDVMDQVIENLQK		0.000345694	3	1138.56	3	1138.56	18.02	3.76539	2.07383	2.07383	supercont2.1,-:519859-519945	exon1
								ANP01236	AIHFGGGNIGR		2.71e-05	3	366.865	3	366.865	33.36	2.77839	-0.202267	-0.202267	supercont2.1,-:519946-519978	exon1
TERG_00205T0	393	41.5	6.18	Trichophyton_rubrum_CBS_118892_alpha-tubulin_suppressor_protein_Aats1_(394_aa)	1	0.0585	supercont2.1,+:521884-523065	ANP01237	VYAAGSNLHGECATHASTQSLLR	C12(Carboxymethyl)	2.29e-07	3	815.396	3	815.396	62.03	4.15576	4.89914	4.89914	supercont2.1,+:522088-522156	exon1
TERG_00210T0	1008	113.3	7.43	Trichophyton_rubrum_CBS_118892_spindle_pole_body_component_(1009_aa)	3	0.0764	supercont2.1,+:538829-541855	ANP01244	QWIYDGELSDPYNEFFVVEPETRPDIDPR		3.01e-06	3	1176.22	3	1176.22	21.43	2.50941	0.415263	0.415263	supercont2.1,+:540200-540286	exon1
								ANP01248	WWTADPNTPGTPLPSGDALLGGEDHLLPSLR		4.99e-12	3	1095.21	3	1095.21	80.24	4.51385	-3.46912	-3.46912	supercont2.1,+:541520-541612	exon1
								ANP01249	LVTLLGDLAYQPDVDMR		1.91e-06	2	960.004	2	960.004	55.14	3.77198	3.49891	3.49891	supercont2.1,+:541652-541702	exon1
TERG_00212T0	254	27.6	5.54	Trichophyton_rubrum_CBS_118892_proteasome_subunit_alpha_type-6_(255_aa)	15	0.7087	supercont2.1,+:543881-544966	ANP01250	HITIFSDQGR		0.000535294	2	587.305	2	587.305	27.39	1.78947	2.0963	2.0963	supercont2.1,+:543976-544005	exon2
								ANP01251	LYQVEYAFK		0.000263135	2	580.805	2	580.805	40.32	2.11781	3.22233	3.22233	supercont2.1,+:544006-544096	exon2-3
								ANP01252	AITAANITSLGIR		1.63e-09	2	650.884	2	650.884	62.5	3.35836	2.63127	1.39407	supercont2.1,+:544097-544135	exon3
								ANP01253	NCAVIISQK	C2(Carboxymethyl)	0.000111628	2	517.271	2	517.271	45.25	2.78889	-0.749229	-0.749229	supercont2.1,+:544142-544168	exon3
								ANP01254	KVPDKLIEPSSVSHVFK		3.9e-05			4	478.275		2.51255		1.71228	supercont2.1,+:544169-544308	exon3-4
								ANP01255	LIEPSSVSHVFK		2.11e-10	2	671.875	2	671.875	34.47	2.42661	3.89962	3.89962	supercont2.1,+:544273-544308	exon4
								ANP01256	ISPSVGCVVTGSIADGR	C7(Carboxymethyl)	4.23e-16	2	838.422	2	838.422	67.57	3.02293	3.45133	3.45133	supercont2.1,+:544309-544359	exon4
								ANP01257	AQSEAAEFEYK		7.5e-07	2	636.791	2	636.791	33.28	2.01651	-0.0438096	-0.0438096	supercont2.1,+:544375-544407	exon4
								ANP01258	FGYEMPCDVLAK	C7(Carboxymethyl)	1.02e-06	2	715.819	2	715.819	19.38	2.67107	-1.45362	-1.45362	supercont2.1,+:544408-544443	exon4
								ANP01259	LANINQVYTQR		3.19e-05	2	660.359	2	660.359	44.8	3.37052	3.22835	3.22835	supercont2.1,+:544447-544479	exon4
								ANP01260	AYMRPLGIATTLISVDSENGPQLFK		4.94e-09	3	907.815	3	907.815	54.2	3.52961	1.19373	1.19373	supercont2.1,+:544580-544654	exon5
								ANP01261	CDPAGYYAGYR	C1(Carboxymethyl)	2.25e-06	2	647.266	2	647.266	56.65	2.55466	3.16195	3.16195	supercont2.1,+:544655-544687	exon5
								ANP01263	KGEIEVGIVGGPR		8.59e-09	3	437.588	3	437.588	26.57	2.07326	4.77666	4.77666	supercont2.1,+:544835-544873	exon5
								ANP01264	ADGNEGTQTAFR		9.98e-07	2	633.79	2	633.79	46.63	2.72603	1.94716	1.94716	supercont2.1,+:544874-544909	exon5
								ANP01265	TLTEDEIEER		1.31e-05	2	617.795	2	617.795	38.82	1.72832	2.46647	2.46647	supercont2.1,+:544910-544939	exon5
TERG_00215T0	561	61.6	6.65	Trichophyton_rubrum_CBS_118892_MFS_peptide_transporter_(562_aa)	13	0.1943	supercont2.1,+:554592-556500	ANP01266	SDKETAPVQATEQHDEK	N-Term(Acetyl)	2.75e-07	3	652.306			44.11		2.13836		supercont2.1,+:554595-554703	exon1-2
								ANP01267	ETAPVQATEQHDEK		1.72e-05	2	791.873	2	791.873	57.39	2.63042	2.57564	2.57564	supercont2.1,+:554604-554703	exon1-2
								ANP01268	QVIKDVAQDPVLDTK		0.000427306	3	556.98	3	556.98	18.26	2.25999	4.89254	4.89254	supercont2.1,+:554704-554748	exon2
								ANP01269	DVAQDPVLDTK		0.000585899	2	600.811	2	600.811	45.97	2.41924	2.72159	2.72159	supercont2.1,+:554716-554748	exon2
								ANP01270	AGSDIDAEKGEGFETPDGEEPTESEK		1.11e-09	3	908.725	3	908.725	36.53	3.60904	-1.5557	-1.5557	supercont2.1,+:554749-554826	exon2
								ANP01271	AGSDIDAEKGEGFETPDGEEPTESEKFNLR		0.000319733	4	814.372	4	814.372	18.44	2.64178	1.8528	1.8528	supercont2.1,+:554749-554838	exon2
								ANP01272	GEGFETPDGEEPTESEK		2.8e-06	2	919.386	2	919.386	42.45	2.77531	2.50103	2.50103	supercont2.1,+:554776-554826	exon2
								ANP01273	SNVAPLIADQYK		0.00606322			2	659.855		2.65376		2.10455	supercont2.1,+:555365-555400	exon4
								ANP01274	SNVAPLIADQYKR		0.00171452	2	737.907	2	737.907	19.63	2.02978	4.02612	4.02612	supercont2.1,+:555365-555403	exon4
								ANP01275	RVPAVSTLSTGER		3.04e-05	2	686.882	2	686.882	37.49	2.55086	2.30522	2.30522	supercont2.1,+:555404-555442	exon4
								ANP01276	VPAVSTLSTGER		7.58e-07	2	608.832	2	608.832	60.48	2.73328	3.66254	3.66254	supercont2.1,+:555407-555442	exon4
								ANP01277	VIIDPAITIQR		0.000355678	2	619.875	2	619.875	23.91	2.24417	-3.80809	-3.80809	supercont2.1,+:555443-555475	exon4
								ANP01278	LHIPFPPISR		6.09e-05	3	392.9	3	392.9	29.86	2.16202	-3.34095	-3.57802	supercont2.1,+:556003-556032	exon5
TERG_00217T0	153	17.5	9.73	Trichophyton_rubrum_CBS_118892_ubiquitin_(154_aa)	6	0.2941	supercont2.1,-:560925-561533	ANP01281	CHLTYVFDESK	C1(Carboxymethyl)	1.77e-07	2	700.314	2	700.314	59.02	2.98529	0.491645	0.491645	supercont2.1,-:560928-560960	exon3
								ANP01282	ECPTPECGAGIFMAAMHNR	C2(Carboxymethyl); C7(Carboxymethyl)	3.7e-16	2	1075.94	2	1075.94	79.43	4.04738	-3.42884	-3.42884	supercont2.1,-:560976-561100	exon2-3
								ANP01283	RECPTPECGAGIFMAAMHNR	C3(Carboxymethyl); C8(Carboxymethyl)	1.07e-13	3	769.661	3	769.661	66.6	6.04837	-3.88364	-3.88364	supercont2.1,-:560976-561103	exon2-3
								ANP01284	LRRECPTPECGAGIFMAAMHNR	C5(Carboxymethyl); C10(Carboxymethyl)	0.00192557	4	644.799	4	644.799	39.55	3.85873	5.0302	5.0302	supercont2.1,-:560976-561109	exon2-3
								ANP01285	VDGDGKIER		0.0011018	2	494.757	2	494.757	71.03	2.59517	1.80868	1.80868	supercont2.1,-:561110-561136	exon2
								ANP01286	YYKVDGDGK		0.000631517	2	522.754	2	522.754	38.27	2.06481	0.951688	0.951688	supercont2.1,-:561119-561145	exon2
TERG_00219T0	447	50.1	8.29	Trichophyton_rubrum_CBS_118892_YagE_family_protein_(448_aa)	6	0.2192	supercont2.1,-:564901-566315	ANP01288	MDYAQEIASVLR		6.89e-09	2	698.349	2	698.349	64.11	2.52438	-1.57177	-1.57177	supercont2.1,-:565072-565107	exon2
								ANP01289	HELGLEGNYDQVGK		2.21e-06	2	779.876	2	779.876	49.93	3.28801	-2.60809	-2.60809	supercont2.1,-:565150-565191	exon2
								ANP01290	LAVLESLLLNYFDSTR		2.93e-09	2	927.506	2	927.506	66.66	3.4804	1.71128	1.71128	supercont2.1,-:565345-565392	exon2
								ANP01292	GDIIILGTNPVPEEQK		4.69e-09	2	861.966	2	861.966	90.33	2.46741	-1.23913	-1.23913	supercont2.1,-:565483-565530	exon2
								ANP01293	METEDLDYIEDPQR		8.4e-08	2	877.384	2	877.384	41.52	2.8767	1.04975	1.04975	supercont2.1,-:565549-565590	exon2
								ANP01294	GYEPDPLETGLYPQVVHIQVPLDSIR		4.64e-07	3	979.175	3	979.175	23.37	2.14943	-2.94764	-2.94764	supercont2.1,-:565756-565833	exon2
TERG_00220T0	1267	139.2	5.3	Trichophyton_rubrum_CBS_118892_vacuolar_assembly_protein_(1268_aa)	5	0.0671	supercont2.1,+:566700-570748	ANP01297	SHLHLEQTEAEHAWER		0.000239191	4	493.989	4	493.989	16.74	1.96109	3.4163	3.4163	supercont2.1,+:567725-567772	exon3
								ANP01298	EYHLLDSVSEDVPGFILLR		0.000105005	3	734.719	3	734.719	18.82	1.54236	-1.39785	-1.39785	supercont2.1,+:569359-569415	exon4
								ANP01299	TAPTTELEEATSEPIK		2.05e-08	2	858.928	2	858.928	41.09	3.72941	-3.27692	-3.27692	supercont2.1,+:569437-569484	exon4
								ANP01300	ALQLILSSLNDISHAISFAK		1.69e-13	2	1071.1	2	1071.1	87.01	5.72094	-2.1797	-2.1797	supercont2.1,+:569887-569946	exon4
								ANP01301	ALLTEASTAIDPIK		0.00112578	2	721.911	2	721.911	24.14	1.72336	3.55959	3.55959	supercont2.1,+:570016-570057	exon4
TERG_00227T0	264	30	6.43	Trichophyton_rubrum_CBS_118892_glutathione_S-transferase_(265_aa)	12	0.5265	supercont2.1,+:601620-602709	ANP01305	MQHQNQVHDPSQLK	N-Term(Acetyl)	1.07e-06	2	866.416	2	866.416	44.89	1.82141	0.792107	0.792107	supercont2.1,+:601620-601661	exon1
								ANP01308	VAVLLDYYR		4.82e-07	2	556.311	2	556.311	46.8	2.6163	-0.204692	-0.204692	supercont2.1,+:601832-601858	exon2
								ANP01309	IPHESVLLSLPESTK		6.75e-10	2	825.457	2	825.457	56.8	3.25061	-2.39048	-2.39048	supercont2.1,+:601859-601993	exon2-3
								ANP01310	AAVAQMHSGLCTVLR	C11(Carboxymethyl)	2.17e-12	2	807.906	2	807.906	89.4	3.80635	-2.22808	-2.22808	supercont2.1,+:602150-602194	exon3
								ANP01311	ASYPTNALAK		0.00190336	1	1035.55	1	1035.55	35.64	1.45307	1.27214	0.745352	supercont2.1,+:602195-602224	exon3
								ANP01312	YTGAIPLYDGAAR		2.19e-05	2	684.351	2	684.351	28.2	2.47244	0.030281	0.030281	supercont2.1,+:602225-602263	exon3
								ANP01314	SYNLPLTGATPEALEWMK		4.88e-13	2	1011.01	2	1011.01	82.72	4.68664	-0.853473	-0.853473	supercont2.1,+:602497-602550	exon4
								ANP01315	IKEIVHGYYLQK		6.56e-05	3	497.619	3	497.619	18.04	2.72086	4.37268	4.37268	supercont2.1,+:602572-602607	exon4
								ANP01316	EIVHGYYLQK		3.62e-06	2	625.332	2	625.332	30.18	2.56481	0.0560888	0.0560888	supercont2.1,+:602578-602607	exon4
								ANP01317	DRSETTISHYDDIFK		1.89e-08	2	913.931	2	913.931	67.25	3.24404	-0.041431	-0.041431	supercont2.1,+:602608-602652	exon4
								ANP01318	SETTISHYDDIFK		1.1e-07	2	778.366	2	778.366	48.22	3.00106	-1.78328	-1.78328	supercont2.1,+:602614-602652	exon4
								ANP01319	GNPDIQFGWFPEDWEFSA		0.00343497	2	1071.47	2	1071.47	12.94	2.64219	-0.312506	-0.312506	supercont2.1,+:602653-602706	exon4
TERG_00230T0	819	91.9	5.34	Trichophyton_rubrum_CBS_118892_RINT-1_family_protein_(820_aa)	6	0.1306	supercont2.1,+:606900-609587	ANP01323	LLVVTQSEHSDEAVR		9.82e-08	2	841.939	2	841.939	59	2.81507	-0.125077	-0.125077	supercont2.1,+:607219-607263	exon2
								ANP01324	LDVSQGYLELLSSVDQLNK		2.98e-12	2	1061.06	2	1061.06	97.79	5.59684	-1.27754	-1.27754	supercont2.1,+:607297-607405	exon2-3
								ANP01326	SLYSDAVSSFISSLLPMVR		3.59e-06	2	1036.54	2	1036.54	41.34	2.30156	-1.80743	-1.80743	supercont2.1,+:608085-608141	exon5
								ANP01327	ESWFSEWLQVEK		3.64e-05	2	784.372	2	784.372	28.54	2.58488	-3.91005	-3.91005	supercont2.1,+:608313-608348	exon5
								ANP01328	SSSDDSSTPTTPSLDLVQTLR		2.12e-08	2	1104.03	2	1104.03	85.15	3.05529	-2.46728	-2.46728	supercont2.1,+:609054-609116	exon5
								ANP01330	DQPPDASDAAGTALGLWEAEK		2.4e-07	2	1071.5	2	1071.5	21.48	1.78554	-2.11977	-2.11977	supercont2.1,+:609408-609470	exon5
TERG_00231T0	552	60.2	6.23	Trichophyton_rubrum_CBS_118892_glutamate_decarboxylase_(553_aa)	1	0.067	supercont2.1,-:609767-611530	ANP01332	LYSSPNAPGLAAELLLGTLNANVHVYQSAPALTVLEK		1.67e-07	3	1279.03	3	1279.03	60.74	2.97029	4.70193	4.70193	supercont2.1,-:611036-611146	exon2
TERG_00232T0	716	79.8	7.91	Trichophyton_rubrum_CBS_118892_rRNA_processing_protein_Nop9_(717_aa)	3	0.0866	supercont2.1,-:611746-613896	ANP01333	EDLQSAIESILLEIPSLVQR		5.67e-09	3	751.749	3	751.749	52.71	5.26142	-0.474616	-0.474616	supercont2.1,-:612562-612621	exon1
								ANP01334	EEGVNFLNSLFYDPVGSR		1.85e-07	2	1021.99	2	1021.99	59.34	2.94871	-0.975294	-0.975294	supercont2.1,-:612766-612819	exon1
								ANP01336	TANEDNDAQAGDDYIPLDTHDTER		7.6e-16	3	892.713	3	892.713	97.53	5.30954	-2.15969	-2.15969	supercont2.1,-:613723-613794	exon1
TERG_00237T0	445	50.3	9.73	Trichophyton_rubrum_CBS_118892_U3_small_nucleolar_RNA_associated_protein_(446_aa)	3	0.0966	supercont2.1,-:620107-621588	ANP01338	FTPDNNYVLSGSDDGNIR		8.19e-10	2	992.453	2	992.453	91.19	3.6591	-3.10768	-3.10768	supercont2.1,-:620392-620445	exon3
								ANP01339	FASGSGDGVVK		0.00276225	2	512.258	2	512.258	49.16	1.96167	-1.6441	-1.6441	supercont2.1,-:621251-621283	exon2
								ANP01340	SAAAQQTPGTNVQR		4.17e-07	2	714.863	2	714.863	66.3	2.77762	0.173409	0.173409	supercont2.1,-:621461-621502	exon2
TERG_00238T0	424	47.3	6.67	Trichophyton_rubrum_CBS_118892_26S_proteasome_non-ATPase_regulatory_subunit_11_(425_aa)	22	0.5967	supercont2.1,+:621917-623256	ANP01341	LAEAEAAAK		8.31e-05	2	437.238	2	437.238	51.89	2.54751	1.8767	1.8767	supercont2.1,+:621947-621973	exon1
								ANP01342	IYQEVVSEGPGSSEAASR		2.06e-12	2	933.447	2	933.447	102.38	4.14557	-0.143185	-0.143185	supercont2.1,+:621998-622051	exon1
								ANP01343	DYEVALLGLGK		6.24e-07	2	589.326	2	589.326	58.32	2.87535	-1.8617	-1.8617	supercont2.1,+:622052-622084	exon1
								ANP01344	ELAELLK		0.00696369	2	408.249	2	408.249	29.06	1.70012	4.99106	4.99106	supercont2.1,+:622112-622132	exon1
								ANP01345	SSFSSFAK		0.00804085	2	430.712	2	430.712	27.44	1.53882	1.97174	1.97174	supercont2.1,+:622142-622165	exon1
								ANP01346	SCIEWAVSER	C2(Carboxymethyl)	2.32e-06	2	619.278	2	619.278	50.27	3.13125	-1.48447	-2.32542	supercont2.1,+:622318-622347	exon2
								ANP01348	QTYYDALTLINSLLR		3.7e-16	2	892.485	2	892.485	65.78	3.55291	2.68893	2.68893	supercont2.1,+:622405-622449	exon2
								ANP01349	VYHALGNQPK		1.62e-05	2	563.804	2	563.804	27.38	2.29332	0.539978	0.539978	supercont2.1,+:622510-622539	exon2
								ANP01350	TSAASVYTPPLLQAGLDMQSGMLHAEDK		2.12e-05	3	977.81	3	977.81	30.77	1.35956	-2.08965	-2.08965	supercont2.1,+:622567-622650	exon2
								ANP01351	DFNTAFSYFIEALEGYHAQEDAGK		1.12e-06	3	908.415	3	908.415	14.37	2.49632	1.10783	1.10783	supercont2.1,+:622651-622722	exon2
								ANP01352	ATSALQYMLLCK	C11(Carboxymethyl)	1.19e-06	2	700.353	2	700.353	65.87	2.72088	1.79156	1.79156	supercont2.1,+:622723-622758	exon2
								ANP01353	IMLNLGNDVNTLLSSK		6.41e-11	2	866.466	2	866.466	93.01	4.25884	-3.53331	-3.53331	supercont2.1,+:622759-622806	exon2
								ANP01355	YAGTSLEAMK		0.00310832	2	535.763	2	535.763	16.76	1.72616	0.234914	0.234914	supercont2.1,+:622819-622848	exon2
								ANP01357	YELGGDVFVR		3.66e-06	2	577.795	2	577.795	32.56	1.66591	-0.705541	-0.705541	supercont2.1,+:622915-622944	exon2
								ANP01358	LYDAMLEQNLIK		7.5e-09	2	725.885	2	725.885	95.69	3.63848	1.15265	1.15265	supercont2.1,+:622960-622995	exon2
								ANP01359	VEIAHIAK		0.000406385	2	440.768	2	440.768	42.2	2.56436	3.62438	3.62438	supercont2.1,+:623017-623040	exon2
								ANP01360	IVGLDTQQVEK		4.53e-05	2	615.341	2	615.341	15.86	2.28691	2.70444	2.70444	supercont2.1,+:623041-623073	exon2
								ANP01361	IVGLDTQQVEKK		4.02e-05	2	679.39	2	679.39	45.01	3.53038	3.72188	3.72188	supercont2.1,+:623041-623076	exon2
								ANP01363	LSQMILDK		0.000843497	1	947.523	1	947.523	51.03	2.27354	-0.010762	-0.010762	supercont2.1,+:623077-623100	exon2
								ANP01364	DKGYDAALETIDR		2.93e-08	2	733.859	2	733.859	62.91	3.13946	-0.860214	-0.860214	supercont2.1,+:623164-623202	exon2
								ANP01365	GYDAALETIDR		2.17e-07	2	612.299	2	612.299	59.11	3.09406	-0.348389	-0.348389	supercont2.1,+:623170-623202	exon2
								ANP01366	LSTVVDLLYTNK		2.51e-07	2	683.384	2	683.384	59.78	3.40322	-1.23281	-1.23281	supercont2.1,+:623203-623238	exon2
TERG_00239T0	509	57.4	7.61	Trichophyton_rubrum_CBS_118892_hypothetical_protein_(510_aa)	5	0.1631	supercont2.1,+:623729-625437	ANP01368	NLPDNVEDIVIGDVAQHYK		2.91e-12	2	1070.04	2	1070.04	101.82	4.97694	-3.88281	-3.88281	supercont2.1,+:624057-624113	exon2
								ANP01370	AGIVAGIWEYVK		6.65e-06	2	653.362	2	653.362	56.26	3.22118	-2.80437	-2.80437	supercont2.1,+:624753-624788	exon2
								ANP01371	LICLTNSPDFPAMLR	C3(Carboxymethyl)	3.36e-09	2	874.941	2	874.941	42.8	2.15885	2.22517	2.22517	supercont2.1,+:625099-625143	exon3
								ANP01372	HVSGLDDQVALAIQALHHSK		3.93e-10	3	713.712	3	713.712	52.55	3.84257	-4.00999	-4.00999	supercont2.1,+:625144-625203	exon3
								ANP01373	DLETVLGETPRPGQGER		0.000285671	3	618.651			14		1.72568		supercont2.1,+:625282-625332	exon3
TERG_00240T0	387	43.7	7.84	Trichophyton_rubrum_CBS_118892_hypothetical_protein_(388_aa)	6	0.2403	supercont2.1,-:625989-627239	ANP01374	VAPPESIEGDANPIILEAASTLEKEEETLITGALDAESK		1.47e-08	3	1351.01	3	1351.01	58.53	2.81785	-4.89082	-4.89082	supercont2.1,-:626058-626174	exon2
								ANP01375	VAPPESIEGDANPIILEAASTLEK		4.95e-08	2	1232.65	2	1232.65	69	3.8981	4.05994	4.05994	supercont2.1,-:626103-626174	exon2
								ANP01377	AFHISDSSVPLSSPEFYSLVFSAR		1.18e-10	3	881.77	3	881.77	38.75	3.57559	-1.0406	-4.73601	supercont2.1,-:626391-626462	exon2
								ANP01378	ISTWLFPK		2.6e-05	2	496.283	2	496.283	38.1	2.73906	-2.03497	-2.2231	supercont2.1,-:627060-627083	exon1
								ANP01379	WLQDLVTPIAQR		4.47e-11	2	720.405	2	720.405	32.38	2.20876	2.05601	2.05601	supercont2.1,-:627174-627209	exon1
								ANP01380	MLDPIPPPPR		0.000137953	2	566.815	2	566.815	25.91	1.75089	4.64913	4.64913	supercont2.1,-:627210-627239	exon1
TERG_00241T0	2354	260.5	4.86	Trichophyton_rubrum_CBS_118892_hypothetical_protein_(2355_aa)	2	0.0157	supercont2.1,-:628049-635201	ANP01384	GGEIMLAGDASIGGDIDGLK		0.00426334	3	630.318	3	630.318	18.13	1.52579	3.66514	3.66514	supercont2.1,-:631493-631552	exon2
								ANP01392	SNASATVQAAAAALAEK		0.00250938			3	525.277		1.11005		-0.407076	supercont2.1,-:634892-634942	exon2
TERG_00242T0	150	17.3	10.32	Trichophyton_rubrum_CBS_118892_60S_ribosomal_protein_L27-A_(151_aa)	6	0.4067	supercont2.1,+:635886-636936	ANP01394	KVVIIQPYDAGSK		1.02e-07	2	709.408	2	709.408	57.69	3.70739	2.33881	2.33881	supercont2.1,+:636037-636402	exon2-3
								ANP01395	AHPFPYALVVGIER		7.7e-07	3	523.627	3	523.627	37.94	3.19468	4.83498	4.83498	supercont2.1,+:636403-636444	exon3
								ANP01396	TVNYNHLMPTR		1.26e-06	2	673.339	2	673.339	51.6	2.33421	2.36597	2.36597	supercont2.1,+:636520-636552	exon3
								ANP01397	YTLELEGLK		3.67e-12	2	533.297	2	533.297	44.59	2.52398	3.72765	3.72765	supercont2.1,+:636553-636579	exon3
								ANP01398	GAVTNDTFK		0.000178747	2	476.741	2	476.741	49.96	2.02221	0.866607	0.866607	supercont2.1,+:636580-636606	exon3
								ANP01399	GAVTNDTFKEVSQR		5.81e-05	2	776.39	2	776.39	73.79	3.64992	-2.10898	-2.10898	supercont2.1,+:636580-636621	exon3
TERG_00243T0	179	19.7	8.19	Trichophyton_rubrum_CBS_118892_hypothetical_protein_(180_aa)	3	0.2123	supercont2.1,+:638664-639265	ANP01400	SIEYADK		0.00875832	2	413.203	2	413.203	24.31	1.67942	1.31616	0.0893229	supercont2.1,+:638849-638869	exon2
								ANP01401	VDHLGNEGLNQVDNTYPK		2.69e-13	2	1006.98	2	1006.98	66.81	3.85794	-2.29915	-2.29915	supercont2.1,+:638945-638998	exon2
								ANP01402	LAQGGSPIVSQGK		1.72e-08	2	621.346	2	621.346	79.29	4.18798	-0.223459	-0.223459	supercont2.1,+:639104-639142	exon2
TERG_00244T0	367	39.9	5.88	Trichophyton_rubrum_CBS_118892_stomatin_family_protein_(368_aa)	10	0.3924	supercont2.1,+:641018-642307	ANP01403	SEATAQHTQTAPNGK	N-Term(Acetyl)	6.15e-08	2	791.877			42.56		0.325157		supercont2.1,+:641021-641065	exon1
								ANP01404	EPQHQQQEAGPEASGVGFRPHHDLISVQPAR		1.35e-09	4	851.422	4	851.422	23.06	3.4001	-0.843907	-0.843907	supercont2.1,+:641084-641176	exon1
								ANP01405	LDDLQPR		0.00688236	1	856.452	1	856.452	13.74	1.27487	-0.460559	-0.460559	supercont2.1,+:641177-641197	exon1
								ANP01406	AVDPGLVK		0.00979259	2	399.741	2	399.741	35.76	2.27473	2.42721	2.42721	supercont2.1,+:641449-641472	exon2
								ANP01407	VNPLSENLTTIDVK		3.29e-15	2	771.925	2	771.925	57.33	3.59529	3.29442	3.29442	supercont2.1,+:641473-641514	exon2
								ANP01408	IQIVEVPR		7.7e-05	2	477.295	2	477.295	47.41	1.78695	4.60833	4.60833	supercont2.1,+:641515-641538	exon2
								ANP01409	AAFGITDIR		0.000642654	2	482.269	2	482.269	23.94	2.07052	4.33081	4.33081	supercont2.1,+:641617-641643	exon2
								ANP01413	AAADILSSAPAMQIR		1.23e-05			2	757.905		2.83977		2.02328	supercont2.1,+:641995-642039	exon3
								ANP01414	YLDTMQAMAK		0.000202456	2	586.279	2	586.279	34.12	2.18536	1.25286	1.25286	supercont2.1,+:642040-642069	exon3
								ANP01415	VIFLPAANNQAAMQAAIANEAGEGSSR		5.55e-10	2	1351.17	2	1351.17	65.12	4.7712	-1.78862	-1.78862	supercont2.1,+:642146-642226	exon4
TERG_00245T0	532	56.9	6.89	Trichophyton_rubrum_CBS_118892_hypothetical_protein_(533_aa)	1	0.0263	supercont2.1,-:642751-644349	ANP01419	EFNIAAAKPELPLK		0.00919136			2	770.943		2.31849		3.45928	supercont2.1,-:644020-644061	exon1
TERG_00246T0	446	48.6	8.34	Trichophyton_rubrum_CBS_118892_hypothetical_protein_(447_aa)	11	0.4305	supercont2.1,-:644926-646587	ANP01421	GMVQEVDHPDCGPIK	C11(Carboxymethyl)	1.96e-07	2	841.881	2	841.881	69.61	4.49417	1.61411	1.61411	supercont2.1,-:645082-645126	exon6
								ANP01423	LFGVLCDR	C6(Carboxymethyl)	5.4e-05	2	490.748	2	490.748	52.42	2.2812	1.43616	1.43616	supercont2.1,-:645387-645410	exon5
								ANP01424	WGTAHPSIVPYR		0.00190679	3	461.911	3	461.911	16.37	2.69213	0.662909	0.662909	supercont2.1,-:645462-645554	exon4-5
								ANP01425	GQYIDACLSDCQIATLANLASSALISGEK	C7(Carboxymethyl); C11(Carboxymethyl)	0.000102788			3	1024.49		2.55087		-2.31275	supercont2.1,-:645567-645653	exon4
								ANP01426	VGVAVTDLTTGLYTSNAIMAALIAR		2.06e-08	3	841.129	3	841.129	55.2	4.42841	1.62491	1.62491	supercont2.1,-:645669-645743	exon4
								ANP01427	AGYDVMVEAEMGLMHITGSR		9.12e-12	3	723.005	3	723.005	77.19	3.4914	0.634817	1.40147	supercont2.1,-:645762-645821	exon4
								ANP01428	LIYASVTGYGQTGPYSK		4.02e-10	2	902.958	2	902.958	88.83	2.82699	-1.48178	-1.48178	supercont2.1,-:645825-645875	exon4
								ANP01429	ESDVFVENYIPGSLK		8.35e-09	2	848.922	2	848.922	41.3	3.29444	-3.90711	-3.90711	supercont2.1,-:645921-645965	exon4
								ANP01430	SVGLSFAHESGIEILHK		0.000468237	3	608.662	3	608.662	21.45	2.46119	4.10043	4.10043	supercont2.1,-:645975-646025	exon4
								ANP01431	EGPGESAYYLGVNR		0.00168705	2	756.357	2	756.357	16.61	2.37452	-3.74551	-3.74551	supercont2.1,-:646035-646130	exon3-4
								ANP01432	VLAGPYCTQILGDLGAEVVK	C7(Carboxymethyl)	1.88e-14	2	1052.55	2	1052.55	103.38	4.72878	-1.64223	-1.64223	supercont2.1,-:646206-646425	exon1-3
TERG_00247T0	237	25.4	5.24	Trichophyton_rubrum_CBS_118892_riboflavin_synthase_subunit_alpha_(238_aa)	7	0.4473	supercont2.1,+:646919-647754	ANP01433	LGDSICVNGTCLTVTAFDK	C6(Carboxymethyl); C11(Carboxymethyl)	1.25e-10	2	1036.98	2	1036.98	65.31	3.25796	-0.563212	-0.563212	supercont2.1,+:647103-647226	exon2-3
								ANP01436	AGSPVNLER		0.00604214	2	471.754			13.92		1.10282		supercont2.1,+:647290-647316	exon3
								ANP01437	MGGHFVQGHVDTTAELLSVTPDGNSLVLR		1.13e-06	3	1017.52	3	1017.52	22.73	2.0516	1.44157	0.0576833	supercont2.1,+:647338-647424	exon3
								ANP01438	GFIALDGASLTITK		1.38e-10	2	703.898	2	703.898	78.76	3.8804	-0.294838	-0.294838	supercont2.1,+:647470-647511	exon3
								ANP01439	KKPGDSINVEIDLVGK		7.43e-08	3	571.322	3	571.322	45.52	3.25551	-3.75494	-3.75494	supercont2.1,+:647587-647634	exon3
								ANP01440	KPGDSINVEIDLVGK		4.92e-08	2	792.434	2	792.434	53.6	3.35646	-2.06642	-2.06642	supercont2.1,+:647590-647634	exon3
								ANP01441	TVQGYFEGQTNGDSAALEK		3.73e-12	2	1007.97	2	1007.97	100.27	3.90011	-1.20793	2.0316	supercont2.1,+:647647-647703	exon3
TERG_00248T0	443	49.7	9.57	Trichophyton_rubrum_CBS_118892_ribosome_biogenesis_protein_Ssf2_(444_aa)	2	0.0971	supercont2.1,-:648061-649460	ANP01445	HLESLVTTVFQSLFPPISPQTTPLASIR		1.42e-05	3	1027.24	3	1027.24	26.76	3.62935	2.73086	2.73086	supercont2.1,-:648808-648891	exon2
								ANP01447	IGAGQVGSSMSQLAK		4.32e-08	2	717.378	2	717.378	55.2	3.32004	4.20785	4.20785	supercont2.1,-:649299-649343	exon1
TERG_00249T0	474	52.1	9.19	Trichophyton_rubrum_CBS_118892_ATP-dependent_rRNA_helicase_RRP3_(475_aa)	6	0.1941	supercont2.1,+:649734-651238	ANP01448	EQEAPEESGEEPADTK		7.59e-08	2	873.371	2	873.371	62.06	3.36749	0.288176	0.288176	supercont2.1,+:649824-649871	exon1
								ANP01449	DLGIIDSLCDACTSLGYK	C9(Carboxymethyl); C12(Carboxymethyl)	7.01e-13	2	1001.95	2	1001.95	67.81	3.76139	-2.99541	-2.99541	supercont2.1,+:649890-649943	exon1
								ANP01450	TPTPIQAESIPLALQGR		6.44e-10	2	896.498	2	896.498	63.74	4.59287	-4.62448	-4.62448	supercont2.1,+:649944-649994	exon1
								ANP01451	KPHIIVATPGR		3.08e-05	3	396.914	3	396.914	18.44	3.57871	4.39232	4.39232	supercont2.1,+:650312-650344	exon2
								ANP01452	LLDLDFGPVLDK		4.23e-16	2	672.875	2	672.875	68.33	4.11378	1.92687	1.92687	supercont2.1,+:650423-650458	exon2
								ANP01453	ALGFGAIPLHGQLSQSAR		2.93e-09	2	911.996	2	911.996	46.57	3.72646	-4.38114	-4.38114	supercont2.1,+:650744-650797	exon2
TERG_00250T0	548	59.5	6	Trichophyton_rubrum_CBS_118892_N-acetylglucosamine-phosphate_mutase_(549_aa)	30	0.7208	supercont2.1,-:651790-653795	ANP01456	IAAVVLEAGK		3.53e-09	2	485.801	2	485.801	62.13	2.86827	0.86158	0.86158	supercont2.1,-:651808-651837	exon6
								ANP01457	SETDDLANR		0.00897906	2	510.733	2	510.733	28.38	1.96453	0.350304	0.350304	supercont2.1,-:651838-651864	exon6
								ANP01458	VYAEAATR		2.21e-05	2	440.731	2	440.731	31.66	2.00452	1.38927	1.74332	supercont2.1,-:651865-651888	exon6
								ANP01460	LQSPVGLQQR		0.000338025	2	563.322	2	563.322	26.78	2.3825	-0.470351	0.0808657	supercont2.1,-:651964-651993	exon6
								ANP01461	EWVATYTDLPNK		1.24e-08	2	718.856	2	718.856	79.03	3.03005	-0.556676	-0.556676	supercont2.1,-:652054-652089	exon6
								ANP01462	YALESLVAMTDLINQAVGDALSDMLLVEVILAHK		1.29e-20	3	1219.32	3	1219.32	121.05	5.46362	3.45209	1.2385	supercont2.1,-:652105-652206	exon6
								ANP01463	TAEPQSPAQK		0.00335743	2	528.771	2	528.771	40.43	1.80148	2.32172	2.32172	supercont2.1,-:652207-652236	exon6
								ANP01464	FDVGVYFEANGHGTITFSENALK		0.00226898			3	839.41		1.40725		2.56162	supercont2.1,-:652246-652314	exon6
								ANP01465	LPVVCTPTGVK	C5(Carboxymethyl)	3.57e-05	2	586.324	2	586.324	23.76	2.29102	1.13947	1.13947	supercont2.1,-:652339-652371	exon6
								ANP01466	IGVVQTAYANGSSTEYIEK		1.07e-09	2	1015.51	2	1015.51	107.03	4.19285	2.12157	2.12157	supercont2.1,-:652381-652437	exon6
								ANP01467	IATLAASFIGELAK		9.61e-13	2	702.909	2	702.908	117.74	4.88526	-0.198622	0.593556	supercont2.1,-:652465-652506	exon6
								ANP01468	LVYYYMDASGVFR	M6(Oxidation)	9.27e-06	2	800.381	2	800.381	38.46	2.80716	1.81333	1.81333	supercont2.1,-:652525-652563	exon6
								ANP01469	CASLDGDADR	C1(Carboxymethyl)	2.79e-05	2	540.717	2	540.717	34.92	1.78074	0.39144	0.39144	supercont2.1,-:652564-652593	exon6
								ANP01470	LNFECGADYVK	C5(Carboxymethyl)	2.16e-05	2	658.794	2	658.794	40.78	2.28153	-2.33681	-2.33681	supercont2.1,-:652642-652741	exon5-6
								ANP01471	DGGLDITVINDDVINPDRLNFECGADYVK	C23(Carboxymethyl)	4.77e-08	3	1080.18	3	1080.18	55.42	2.99555	-1.79102	0.408278	supercont2.1,-:652642-652795	exon5-6
								ANP01472	DGGLDITVINDDVINPDR		8.21e-13	2	970.981	2	970.981	101.7	3.16375	-0.941136	-0.941136	supercont2.1,-:652742-652795	exon5
								ANP01474	TTTGSVTVDCANGVGGPK	C10(Carboxymethyl)	5.18e-12	2	861.408	2	861.408	69.08	3.72976	4.40943	4.40943	supercont2.1,-:652832-652885	exon5
								ANP01476	NTLGTPYEYGEPTEK		6.38e-08	2	849.899	2	849.898	70.98	3.08318	1.84114	2.34951	supercont2.1,-:652937-652981	exon5
								ANP01477	YLTTPQLHYIVR		0.00239795	2	752.417	2	752.417	24.49	2.41954	-3.70815	-3.70815	supercont2.1,-:652988-653023	exon5
								ANP01478	LATALSAAMAASEVEATDFK		3.82e-16	3	666.335	2	999.002	93.83	3.75622	3.31529	0.502424	supercont2.1,-:653024-653083	exon5
								ANP01479	LVDEIEIK		3.15e-05	2	479.776	2	479.776	37.4	2.89312	-0.791186	-0.791186	supercont2.1,-:653141-653164	exon5
								ANP01480	LANAPLETLGEEYAK		4.23e-16	2	809.921	2	809.921	49.29	3.12805	1.96483	1.96483	supercont2.1,-:653165-653209	exon5
								ANP01481	LVDPMGEMLEAEWEVFATR		1.69e-14	2	1112.03	2	1112.03	69.5	3.90917	-1.32881	-1.32881	supercont2.1,-:653210-653396	exon3-5
								ANP01482	LNGQYIGVMITASHNPAEDNGVK		3.65e-09	3	810.068	3	810.068	42.26	1.81045	-1.86529	-1.86529	supercont2.1,-:653397-653465	exon3
								ANP01483	KLNGQYIGVMITASHNPAEDNGVK		2.8e-12	3	852.766	3	852.766	85.33	5.85837	-1.29005	-1.29005	supercont2.1,-:653397-653468	exon3
								ANP01484	SELLNTVVFAMGLLAGLR	M11(Oxidation)	4.18e-14	3	640.692	2	960.535	70.97	3.7704	0.527851	-0.676362	supercont2.1,-:653475-653594	exon2-3
								ANP01485	MKSELLNTVVFAMGLLAGLR		8.12e-06	3	721.74	3	721.742	35.33	2.83259	4.04573	1.8272	supercont2.1,-:653475-653600	exon2-3
								ANP01486	IFEYGTAGFR		9.86e-08	2	580.791	2	580.791	60.12	3.18063	0.964005	0.643436	supercont2.1,-:653601-653726	exon1-2
								ANP01487	AASAYTKPEGK		0.000771312	2	561.794	2	561.794	35.45	2.12469	0.788093	0.788093	supercont2.1,-:653727-653759	exon1
								ANP01488	ASAELQQAINK	N-Term(Acetyl)	4.21e-08	2	607.823			62.34		0.232762		supercont2.1,-:653760-653792	exon1
TERG_00251T0	331	39	8.81	Trichophyton_rubrum_CBS_118892_Mn2+_homeostasis_protein_(332_aa)	2	0.1057	supercont2.1,-:654276-655521	ANP01489	LLLWDCPSNCDYSCQHVVTNQR	C6(Carboxymethyl); C10(Carboxymethyl); C14(Carboxymethyl)	4.15e-08	3	923.393	3	923.393	29.66	2.32545	-3.66216	-3.66216	supercont2.1,-:655138-655203	exon3
								ANP01490	CETGQTSLPIHLR	C1(Carboxymethyl)	3.852e-05	3	504.923	2	756.88	39.8	3.07395	4.19541	4.67462	supercont2.1,-:655204-655311	exon2-3
TERG_00253T0	348	39.5	5.19	Trichophyton_rubrum_CBS_118892_HNRNP_arginine_N-methyltransferase_(349_aa)	15	0.5891	supercont2.1,+:657336-658702	ANP01492	MVGMDHAEVR		0.000100196	2	572.766	2	572.766	26.62	1.86343	0.17774	0	supercont2.1,+:657387-657416	exon1
								ANP01493	YFTSYDHYGIHEEMLK		1.68e-11	2	1016.96	2	1016.96	81.74	3.46516	-3.77774	-3.77774	supercont2.1,+:657417-657655	exon1-4
								ANP01494	DAIYNSK		0.00482378	1	810.4	1	810.4	33.79	1.70342	2.85111	2.85111	supercont2.1,+:657683-657703	exon4
								ANP01495	VVLDVGCGTGILSMFAVK	C7(Carboxymethyl)	5.06e-11	2	933.989	2	933.989	61.69	3.77576	0.491688	0.491688	supercont2.1,+:657722-657835	exon4-5
								ANP01496	HVIGVDMSSIIGK		1.01e-10	2	678.37	3	452.582	69.48	3.83624	-2.06715	-1.41833	supercont2.1,+:657848-657886	exon5
								ANP01497	EIVEANGMSDK		4.36e-06	2	596.78	2	596.78	28.07	2.15652	0.258964	0.258964	supercont2.1,+:657893-657925	exon5
								ANP01499	MEEVELPFPK		1.89e-09	2	609.81	2	609.81	49.49	2.81656	4.09261	4.09261	supercont2.1,+:657947-657976	exon5
								ANP01500	DNYLNPNGLIFPDK		5.26e-07	2	810.405	2	810.405	65.55	3.43812	-2.06812	-2.06812	supercont2.1,+:658055-658096	exon5
								ANP01501	ATIYLGAIEDGDYKEEK		7.14e-08	2	957.967	2	957.967	70.65	4.41329	-3.49453	-3.49453	supercont2.1,+:658097-658147	exon5
								ANP01502	IGFWDNVYGFDYSAMK		4.23e-16	2	956.937	2	956.937	38.43	2.73711	4.8676	4.8676	supercont2.1,+:658148-658264	exon5-6
								ANP01503	DVALTEPLVDIVELK		2.75e-14	3	551.984	3	551.984	65.29	3.75627	3.38385	3.38385	supercont2.1,+:658265-658309	exon6
								ANP01504	ALVSDPCALVTLDLYTVTTADLSFK	C7(Carboxymethyl)	2.04e-11	3	905.466	3	905.464	32.94	3.47752	-2.30255	-0.915025	supercont2.1,+:658310-658384	exon6
								ANP01505	VPFTLTAR		0.00110377	2	452.767	2	452.767	29.33	2.41505	1.32195	1.32195	supercont2.1,+:658385-658408	exon6
								ANP01507	AQESVTGFLENRPNQK		4.23e-16	2	909.462	2	909.462	72.52	3.91765	1.61586	1.61586	supercont2.1,+:658559-658606	exon6
								ANP01508	NSQGLCQYR	C6(Carboxymethyl)	0.000280244	2	563.751	2	563.751	32.21	2.47979	-0.112823	-0.112823	supercont2.1,+:658667-658693	exon6
TERG_00254T0	316	34.8	9.14	Trichophyton_rubrum_CBS_118892_peroxisomal_multifunctional_enzyme_type_2_(317_aa)	5	0.2405	supercont2.1,+:659310-660464	ANP01509	SGPGAGHQFPSEGVSWMK	N-Term(Acetyl)	2.63e-05	2	950.936			22.95		0.285539		supercont2.1,+:659313-659366	exon1
								ANP01510	YTSQEVIDFYSSK		4.95e-07	2	783.871	2	783.871	65.16	3.2269	0.0552775	0.0552775	supercont2.1,+:659599-659637	exon3
								ANP01511	GPASVNFSPPQGK		0.000111877	2	643.332	2	643.332	24.6	2.46704	0.261779	0.261779	supercont2.1,+:659911-660009	exon3-4
								ANP01512	GPDAVHEYQTTENTAMLYR		3.74e-12	2	1098.51	2	1098.5	101.32	4.4306	-1.76941	0.808328	supercont2.1,+:660010-660066	exon4
								ANP01515	VEDGFEEIIFTTK		2.49e-05	2	764.385	2	764.385	49.77	3.2679	3.27969	3.27969	supercont2.1,+:660351-660389	exon5
TERG_00255T0	439	49.6	7.24	Trichophyton_rubrum_CBS_118892_trimethyllysine_dioxygenase_(440_aa)	9	0.3576	supercont2.1,+:661009-662979	ANP01516	ASASSQLTQADTSSTVPSVSFPVPGLEGHK		0.00504981			3	995.83		1.55581		-2.04771	supercont2.1,+:661332-661421	exon3
								ANP01517	WSNFWLR		0.00129518	2	504.757	2	504.757	35.57	2.08639	1.85041	1.85041	supercont2.1,+:661422-661492	exon3-4
								ANP01518	LLDTFSLPEDGKPSTIK		2.23e-07	3	621.002	3	621.002	21.15	2.19605	-1.63102	-1.63102	supercont2.1,+:661541-661652	exon4-5
								ANP01519	STFTYEWLENHTSSSAAPAETPVIR		0.000638169	3	932.112	3	932.112	14.25	2.87922	-3.85272	-3.85272	supercont2.1,+:661757-661831	exon6
								ANP01520	NDLEYVESTSK		0.00382913	2	642.801	2	642.801	34.68	2.44625	-0.430411	-0.430411	supercont2.1,+:661883-661915	exon7
								ANP01522	AHTDTTYFTDPAGLQLFHMLSHTDGK		1.65e-06			4	726.845		2.17324		-1.69738	supercont2.1,+:662272-662349	exon9
								ANP01523	GGETLLVDGFK		0.00804534	2	568.304			28.57		0.529708		supercont2.1,+:662350-662382	exon9
								ANP01524	TLLEEDPAAYQALSDIK		6.1e-09	2	938.982	2	938.982	64.4	3.93818	1.49595	1.49595	supercont2.1,+:662392-662442	exon9
								ANP01525	LEPGTPLIFDNWR		1.46e-07	2	779.407	2	779.407	30.1	1.80909	0.631951	0.631951	supercont2.1,+:662671-662779	exon9-10
TERG_00256T0	461	51.8	5.14	Trichophyton_rubrum_CBS_118892_26S_protease_regulatory_subunit_6A_(462_aa)	19	0.5206	supercont2.1,+:663406-664932	ANP01526	STLEDLDDLER	N-Term(Acetyl)	4.42e-05	2	674.315			32.92		-3.89301		supercont2.1,+:663409-663441	exon1
								ANP01527	ETEKKEEEDLIDEEILR		0.00102039	3	706.686	3	706.686	15.65	3.23476	-0.75804	-0.75804	supercont2.1,+:663520-663570	exon1
								ANP01528	KEEEDLIDEEILR		8.81e-09	3	544.278	3	544.278	90.81	3.70184	0.197849	1.02203	supercont2.1,+:663532-663570	exon1
								ANP01529	EEEDLIDEEILR		1.97e-08	2	751.864	2	751.864	70.97	3.01436	-0.854385	-0.854385	supercont2.1,+:663535-663570	exon1
								ANP01531	QTIFLPLIGLVDHEQLKPGDLIGVNK		3.9e-08			4	715.159		1.65523		-1.69644	supercont2.1,+:663923-664000	exon2
								ANP01532	DSYLVLDTLPAEYDSR		4.2e-15	2	928.946	2	928.946	65.97	3.08718	-3.99772	-3.99772	supercont2.1,+:664001-664048	exon2
								ANP01533	AMEVDEKPTEQYSDVGGLNK		7.09e-13	2	1105.51	2	1105.51	89.68	3.6802	-2.73526	-2.73526	supercont2.1,+:664055-664114	exon2
								ANP01534	QIEELLEAIVWPMK		5.79e-08	2	849.96	2	849.96	45.59	3.08693	-1.07698	-1.07698	supercont2.1,+:664115-664156	exon2
								ANP01535	GALMYGPPGTGK		0.000867724	2	574.793	2	574.793	25.66	2.23276	0.998946	0.998946	supercont2.1,+:664199-664308	exon2-3
								ANP01536	ACAAQTEATFLK	C2(Carboxymethyl)	1.38e-08	2	656.316	2	656.316	71.06	3.67263	-0.447664	-0.447664	supercont2.1,+:664324-664359	exon3
								ANP01537	LAGPQLVQMFIGDGAK		1.25e-10	2	822.941	2	822.941	86.04	4.25544	-2.12288	-2.12288	supercont2.1,+:664360-664407	exon3
								ANP01539	EKAPAIIFIDELDAIGTK		4.44e-10	3	648.694	3	648.694	69.7	3.37434	-0.152417	-0.152417	supercont2.1,+:664438-664491	exon3
								ANP01540	APAIIFIDELDAIGTK		5.21e-08	2	843.969	2	843.969	72.91	4.24094	-0.681712	-0.681712	supercont2.1,+:664444-664491	exon3
								ANP01541	TMLELLNQLDGFASDDR		2.57e-13	2	969.472	2	969.472	101.21	4.21252	4.63758	4.63758	supercont2.1,+:664534-664584	exon3
								ANP01542	IDVLDPALLR		5.02e-09	2	562.839	2	562.839	41.04	2.32961	3.04797	3.04797	supercont2.1,+:664612-664641	exon3
								ANP01543	KIEFPLPNEEAR		0.000415242	2	721.887	2	721.887	21.56	2.42572	2.02842	2.02842	supercont2.1,+:664660-664695	exon3
								ANP01545	STDEFGGAQLK		0.000443399	2	576.781	2	576.781	25.92	1.87334	1.137	1.137	supercont2.1,+:664768-664800	exon3
								ANP01546	AVCVEAGMIALR	C3(Carboxymethyl)	0.000169672	2	645.834	2	645.834	29.99	2.59818	4.36156	4.36156	supercont2.1,+:664801-664836	exon3
								ANP01547	VSHEHYVDAISEVMAK		3.98e-11	3	605.63	3	605.63	67.18	3.96985	1.88078	0.990209	supercont2.1,+:664852-664899	exon3
TERG_00258T0	1040	112.5	6.81	Trichophyton_rubrum_CBS_118892_AGC/AKT_protein_kinase_(1041_aa)	10	0.2183	supercont2.1,-:670518-673706	ANP01548	AAALANGLNPAGTPLSPGMQANFK		1.55e-05	2	1156.1	2	1156.1	38.71	4.22916	1.53795	1.53795	supercont2.1,-:670794-670865	exon2
								ANP01549	GVIPPFKPTLTSVMDTSYFDPEFTTALEQSASLNAR		6.86e-09	3	1310.98	3	1310.98	35.6	3.78143	-2.00966	-2.00966	supercont2.1,-:670866-670973	exon2
								ANP01550	ELMAHPFFHDIDWVVLANK		1.57e-12	3	761.383	3	761.383	61.02	3.08149	-4.09021	-4.09021	supercont2.1,-:670974-671030	exon2
								ANP01552	DDTTNTFCGTTEYLAPEVLLNETGYTK	C8(Carboxymethyl)	3.36e-05	3	1018.8	3	1018.8	12.3	2.22321	1.91636	1.91636	supercont2.1,-:671247-671327	exon2
								ANP01553	DLKPENILLDANGHIALCDFGLSK	C18(Carboxymethyl)	0.0011902			4	664.34		2.24933		-4.84769	supercont2.1,-:671343-671414	exon2
								ANP01555	TAMTDSPFIVGLK		0.000612516	2	690.364	2	690.364	43.5	2.95849	-2.55898	-2.55898	supercont2.1,-:671589-671627	exon2
								ANP01557	GGQTASMAGHGAGSR		2.87e-07	2	672.81	2	672.81	60.17	2.11087	3.54872	3.54872	supercont2.1,-:672267-672311	exon1
								ANP01558	SSGASEESGVPVTASLK		4.91e-09	2	803.404	2	803.404	74.15	3.94443	2.21522	2.21522	supercont2.1,-:672432-672482	exon1
								ANP01559	SIIEHSPPHQGNNTPDSSSQGGR		7.87e-05	3	801.375	3	801.375	25.77	3.42751	1.46958	1.46958	supercont2.1,-:672549-672617	exon1
								ANP01560	HGDDSQDQIGSMGSTPTGIATPQPDPSDK		3.01e-12	3	980.437	3	980.437	61.97	4.69836	0.384325	0.384325	supercont2.1,-:673587-673673	exon1
TERG_00269T0	438	50	5.59	Trichophyton_rubrum_CBS_118892_phosphoglycerate_mutase_family_domain-containing_protein_(439_aa)	2	0.0616	supercont2.1,-:690320-691706	ANP01566	IPNGESAADAYDR		5.79e-06	2	689.816	2	689.816	31.56	2.43981	0.0874513	0.0874513	supercont2.1,-:691196-691234	exon2
								ANP01567	SLTSDDPSPSPFPR		9.31e-07	2	751.863	2	751.863	66.41	3.15393	0	-0.437325	supercont2.1,-:691361-691402	exon2
TERG_00270T0	503	54.3	5.49	Trichophyton_rubrum_CBS_118892_hypothetical_protein_(504_aa)	1	0.0298	supercont2.1,+:692090-693601	ANP01568	LANLLNMLSALEPLR		3.09e-05	2	834.483	2	834.483	37.43	2.79168	-0.138523	-0.138523	supercont2.1,+:692942-692986	exon1
TERG_00274T0	321	36.1	9.8	Trichophyton_rubrum_CBS_118892_hypothetical_protein_(322_aa)	8	0.3583	supercont2.1,-:702485-703512	ANP01571	GHYGWLNGLLDGLAAAHADR		7.18e-10	3	703.02	3	703.02	48.62	3.91872	-0.0498789	-0.0498789	supercont2.1,-:702632-702691	exon2
								ANP01572	ILLLEHGR		0.000770939	2	475.793	2	475.793	28.49	1.54382	0.0576821	0.0576821	supercont2.1,-:702692-702715	exon2
								ANP01573	LLQHLGELLVTSDDGR		4.98e-05	3	589.321	3	589.321	29.37	1.63107	0	-2.61931	supercont2.1,-:702716-702763	exon2
								ANP01574	FDTVVQTMGLCSHPEPVK	C11(Carboxymethyl)	1.54e-08	2	1023.49	2	1023.49	66.97	4.34933	-1.59037	-0.90885	supercont2.1,-:702764-702817	exon2
								ANP01575	SVTFIDLWPEMVDIAR		6.39e-06	2	946.483	2	946.483	24.68	2.66218	-1.64068	-1.64068	supercont2.1,-:702923-702970	exon2
								ANP01577	GHVLEVSVGTGR		3.36e-07	2	605.831	2	605.831	70.4	3.16427	0.866819	0.866819	supercont2.1,-:703046-703081	exon2
								ANP01578	TTAGQYDGDVDLAER		4.03e-10	2	805.868	2	805.868	77.86	3.58096	0.201267	0.201267	supercont2.1,-:703130-703174	exon2
								ANP01579	LAVDTDVSDR		8.72e-06	2	545.771	2	545.771	36.6	2.33415	-1.73394	-1.73394	supercont2.1,-:703181-703210	exon2
TERG_00275T0	467	50.2	7.06	Trichophyton_rubrum_CBS_118892_fructosyl_amino_acid_oxidasesarcosine_oxidase_(468_aa)	7	0.3405	supercont2.1,+:703946-705521	ANP01580	GSITLLEAAPAIPNPHGSSVDSSR		0.00033027	3	792.741	3	792.741	23.49	2.96049	-2.40779	-2.40779	supercont2.1,+:704111-704182	exon2
								ANP01581	CLSPDAVELLPTASDVR	C1(Carboxymethyl)	9.96e-09	2	922.456	2	922.456	58.98	3.38944	-3.4566	-3.4566	supercont2.1,+:704366-704416	exon2
								ANP01582	VVPGYGVAAHVSGGYVNWDSAWSDAESAIR		1.59e-08	3	1040.84	3	1040.84	33.31	2.95307	3.91119	3.91119	supercont2.1,+:704420-704509	exon2
								ANP01584	LIIDHSNNNQNQVTGVELSDGNR		7.3e-11	3	846.418	3	846.418	57.7	4.02839	1.84119	1.84119	supercont2.1,+:704573-704641	exon2
								ANP01585	AEATGHPLAYLPLTDEEQR		2.07e-06	2	1056.03	2	1056.03	43.95	3.83987	1.10394	1.10394	supercont2.1,+:704711-704767	exon2
								ANP01586	INHPTASSAPVEVSLPLHGTSVPLEGQLAAR		3.99e-10	3	1050.23	3	1050.23	71.59	5.06203	0.0979867	0.0979867	supercont2.1,+:704885-704977	exon2
								ANP01587	IVDAMQGILDSDLAR		1.14e-11	2	808.921	2	808.921	107.57	3.99576	1.91798	1.91798	supercont2.1,+:705261-705305	exon3
TERG_00276T0	84	8.1	5.58	Trichophyton_rubrum_CBS_118892_TATA-box_binding_protein_(85_aa)	1	0.1786	supercont2.1,-:708058-708319	ANP01589	MDSLTTHPATAQQAK	N-Term(Acetyl)	2.27e-06	2	821.403	2	821.403	53.39	4.02702	4.81166	4.81166	supercont2.1,-:708275-708319	exon1
TERG_00278T0	548	60.5	6.48	Trichophyton_rubrum_CBS_118892_electron_transfer_flavoprotein-ubiquinone_oxidoreductase_(549_aa)	27	0.6734	supercont2.1,+:710699-712556	ANP01590	KLANEAGNEDFR		0.000663742	2	682.336	2	682.336	55.97	2.71244	2.85894	2.85894	supercont2.1,+:710836-710871	exon2
								ANP01591	LANEAGNEDFR		6.35e-08	2	618.287	2	618.287	54.22	2.57963	2.05638	2.05638	supercont2.1,+:710839-710871	exon2
								ANP01592	AGEIGDHIVSGNVLQPTAINELLPDWLAEDNPNR		2.33e-11	3	1223.28	3	1223.28	66.57	5.35078	0.0441051	0.0441051	supercont2.1,+:710890-710991	exon2
								ANP01593	AGEIGDHIVSGNVLQPTAINELLPDWLAEDNPNRFEHTTPVTTDK		2.23e-10	4	1231.86	4	1231.86	57.18	4.73215	-3.56355	-3.56355	supercont2.1,+:710890-711024	exon2
								ANP01594	FEHTTPVTTDK		0.000415807	2	638.316	2	638.316	32.08	2.56516	1.96424	1.96424	supercont2.1,+:710992-711024	exon2
								ANP01596	YAIPIPAPPQMNNHGNYILSLSQLCK	C25(Carboxymethyl)	1.05e-09	3	980.827	3	980.827	32.92	2.16126	-2.55062	-2.55062	supercont2.1,+:711046-711123	exon2
								ANP01597	AEELGVEVYPGFAASEVLYNADGSVK		3.32e-09	2	1357.66	2	1357.66	104.42	3.57163	-1.74348	-1.74348	supercont2.1,+:711139-711216	exon2
								ANP01598	GVATNDVGIGR		2.64e-07	2	529.783	2	529.783	62.86	2.9986	0.0444723	-0.424943	supercont2.1,+:711217-711249	exon2
								ANP01600	VTLLGEGCHGSLTK	C8(Carboxymethyl)	1.55e-08	2	736.872	2	736.872	65.86	3.24009	-3.87409	-3.87409	supercont2.1,+:711301-711342	exon2
								ANP01601	RDCQPQTYGIGIK	C3(Carboxymethyl)	8.06e-05	2	768.879	2	768.879	49.52	3.91006	1.78636	1.78636	supercont2.1,+:711370-711408	exon2
								ANP01602	EVWEVQPEK		0.00305536	2	572.287	2	572.287	27.2	2.20017	-1.9159	-1.9159	supercont2.1,+:711409-711435	exon2
								ANP01603	GEVTHTMGYPLPR		4.8e-05	3	486.58	3	486.58	17.19	2.14321	3.64176	3.64176	supercont2.1,+:711445-711483	exon2
								ANP01604	LKQHPLFR		0.000559856	3	346.88	3	346.88	21.65	1.91929	3.80873	3.80873	supercont2.1,+:711601-711624	exon2
								ANP01605	SVLEGGQCIAYAGR	C8(Carboxymethyl)	4.23e-16	2	741.36	2	741.36	71.28	4.31291	4.77614	4.77614	supercont2.1,+:711625-711666	exon2
								ANP01606	ALIEGGFQSIPK		4.23e-16	2	630.356	2	630.356	65.37	3.4293	3.56298	3.56298	supercont2.1,+:711667-711702	exon2
								ANP01608	CAFPGGALIGDSAGFMNVPK	C1(Carboxymethyl)	4.23e-16	2	1005.48	2	1005.48	81.64	4.92703	4.49197	4.49197	supercont2.1,+:711703-711762	exon2
								ANP01609	ATYSALSGNSSDGTIFLYEYEDALR		3.26e-10	2	1372.14	2	1372.14	91.41	3.22915	0.109289	0.109289	supercont2.1,+:711811-711885	exon2
								ANP01610	SSTIWSELK		7.34e-05	2	525.78	2	525.78	49.67	1.51304	5.00282	5.00282	supercont2.1,+:711886-711912	exon2
								ANP01611	HHSTDSAATKPASVCK	C15(Carboxymethyl)	4.17e-09	2	849.402	2	849.402	76.38	3.35097	3.2151	3.2151	supercont2.1,+:712027-712074	exon2
								ANP01612	KIEYPKPDGEVTFDILTSVSR		0.00308544			3	798.756		2.3146		-0.307787	supercont2.1,+:712075-712137	exon2
								ANP01613	IEYPKPDGEVTFDILTSVSR		1.32e-07	3	756.057	3	756.057	42.76	3.89149	-2.33418	-2.33418	supercont2.1,+:712078-712137	exon2
								ANP01614	TGTNHEEDQPVHLQVADWEK		4.91e-09	3	778.362	3	778.362	27.28	3.14696	-3.26514	-3.26514	supercont2.1,+:712138-712197	exon2
								ANP01615	FCPAGVYEYIEDK	C2(Carboxymethyl)	3.69e-05	2	796.352	2	796.352	60.85	3.00482	-1.53433	-1.53433	supercont2.1,+:712243-712281	exon2
								ANP01616	FCPAGVYEYIEDKDKPHGVR	C2(Carboxymethyl)	3.02e-05	5	477.029	5	477.029	14.26	2.30939	-5.1126	-3.62862	supercont2.1,+:712243-712302	exon2
								ANP01617	FQINAQNCIHCK	C8(Carboxymethyl); C11(Carboxymethyl)	1.49e-08	2	767.84	2	767.84	60.96	3.22975	-2.94715	-2.94715	supercont2.1,+:712303-712472	exon2-3
								ANP01618	TCDIKVPTQDINWQTPQGGEGPK	C2(Carboxymethyl)	1.53e-07	3	857.408	3	857.408	76.07	4.00558	-4.58927	-3.98302	supercont2.1,+:712473-712541	exon3
								ANP01619	VPTQDINWQTPQGGEGPK		4.23e-16	2	976.482	2	976.482	90.8	3.96869	3.24689	3.24689	supercont2.1,+:712488-712541	exon3
TERG_00279T0	322	36.6	6.32	Trichophyton_rubrum_CBS_118892_pre-RNA_splicing_factor_Srp2_(323_aa)	7	0.2143	supercont2.1,+:713131-715212	ANP01620	SEVSSTR	N-Term(Acetyl)	0.00702449	1	807.386			24.51		-0.192084		supercont2.1,+:713134-713154	exon1
								ANP01621	LYLGNLPR		0.000132898	2	473.28	2	473.28	56.2	2.41674	2.85413	2.85413	supercont2.1,+:713155-713178	exon1
								ANP01622	QDIEEHFGSHGTGK		6.16e-05	3	514.571	3	514.571	38.29	2.37437	0	-0.351818	supercont2.1,+:713593-713634	exon2
								ANP01623	LMQGFGFIEYEDAMDAK		5.81e-12	2	982.944	2	982.944	86.61	4.13149	-2.49229	-2.49229	supercont2.1,+:713650-713700	exon2
								ANP01625	RGPPYPPVDDYDR		0.00380942	2	773.868	2	773.868	38.65	2.66467	-0.0575775	-0.0575775	supercont2.1,+:714877-714915	exon4
								ANP01626	GPPYPPVDDYDR		0.00502617	2	695.82	2	695.82	17.9	1.95319	0.37598	0.37598	supercont2.1,+:714880-714915	exon4
								ANP01628	RPYDDPYDMR		0.000589071	2	664.291	2	664.291	22.13	2.79821	-0.153912	-0.153912	supercont2.1,+:715057-715086	exon4
TERG_00280T0	302	33.8	6.3	Trichophyton_rubrum_CBS_118892_hypothetical_protein_(303_aa)	10	0.4437	supercont2.1,+:716387-717363	ANP01630	SMCDYIQLR	C3(Carboxymethyl)	0.000156366	2	593.764	2	593.764	30.07	2.5418	-2.66674	-2.66674	supercont2.1,+:716396-716422	exon1
								ANP01631	DVQLPVPVYLQR		7.73e-05	2	713.905	2	713.905	36.44	2.2995	-2.50288	-2.50288	supercont2.1,+:716423-716458	exon1
								ANP01632	LSYPAALISLAAENDTVGHTLDYGTLYR		8.93e-15	3	1008.85	3	1008.85	74.73	3.67525	-2.08526	-2.08526	supercont2.1,+:716510-716593	exon1
								ANP01633	DIVDVALTISDAAHK		1.13e-09	2	784.424	2	784.424	83.93	5.06751	4.80307	4.80307	supercont2.1,+:716684-716728	exon1
								ANP01634	DDAVYLDHWFTEK		1.58e-08	2	819.875	2	819.875	48.23	2.49814	-0.71824	-0.71824	supercont2.1,+:716768-716806	exon1
								ANP01635	KEEITVDLHLPK		1.11e-08	3	474.604	3	474.604	37.95	2.9864	-1.88491	-1.88491	supercont2.1,+:716807-716842	exon1
								ANP01636	GLFCTLVTR	C4(Carboxymethyl)	8.17e-06	2	534.28	2	534.28	51.95	3.12514	-3.17429	-3.17429	supercont2.1,+:716864-716890	exon1
								ANP01638	VAESVDKTSYETVEALATHAAK		6.15e-06	4	580.796	4	580.796	21.67	2.38304	-2.50151	-2.50151	supercont2.1,+:717092-717225	exon1-2
								ANP01639	TSYETVEALATHAAK		1.2e-09	2	796.403	2	796.403	56.19	3.10248	1.10561	1.10561	supercont2.1,+:717181-717225	exon2
								ANP01640	IVLVEFPLDEVTVR		1.54e-08	2	814.966	2	814.966	23.77	3.63731	-0.632519	-0.632519	supercont2.1,+:717226-717267	exon2
TERG_00282T0	995	111.6	7.81	Trichophyton_rubrum_CBS_118892_hypothetical_protein_(996_aa)	2	0.0432	supercont2.1,-:720461-723448	ANP01641	IPPSAFNQLLAAIVDTQGCLPGK	C19(Carboxymethyl)	0.00147916	3	804.428	3	804.428	12.55	1.85962	2.29118	2.29118	supercont2.1,-:720881-720949	exon1
								ANP01642	NQDEALELACSLLVDLLNGK	C10(Carboxymethyl)	1.51e-08	2	1108.56	2	1108.56	44.24	2.56809	-1.58758	-1.58758	supercont2.1,-:721106-721165	exon1
TERG_00284T0	359	38.4	5.71	Trichophyton_rubrum_CBS_118892_peroxisomal_membrane_anchor_protein_(360_aa)	10	0.3788	supercont2.1,+:726764-728093	ANP01646	AREELITSAVTFLQDPSVSSAPLEK		4.03e-11	3	896.81			64.97		2.5485		supercont2.1,+:726767-726975	exon1-3
								ANP01647	EELITSAVTFLQDPSVSSAPLEK		4.96e-09	2	1231.14	2	1231.14	79.89	5.21026	0.441493	0.441493	supercont2.1,+:726773-726975	exon1-3
								ANP01648	NLTQEEIDIALTR		4.14e-10	2	758.405	2	758.405	82.17	2.91955	0.28316	0.28316	supercont2.1,+:727000-727038	exon3
								ANP01649	SGSSSPSTPASEQQSR		1.03e-07	2	796.862	2	796.862	51.38	2.42396	0.870578	0.870578	supercont2.1,+:727039-727086	exon3
								ANP01651	YISPLIAPPTAPQLQQDK		4.39e-05	2	990.542	2	990.542	38.25	2.86747	-2.17998	-2.17998	supercont2.1,+:727386-727439	exon5
								ANP01652	ESVDEQFSR		0.00011869	2	548.749	2	548.749	60.51	1.66284	0.165993	0.165993	supercont2.1,+:727440-727466	exon5
								ANP01653	AFSLLDQLSADTAALK		4.65e-12	2	832.449	2	832.449	94.82	4.36875	-0.164708	-0.164708	supercont2.1,+:727467-727514	exon5
								ANP01654	DVEEVVQELK		6.04e-05	2	594.313	2	594.313	48.13	2.94335	-0.788297	-0.788297	supercont2.1,+:727560-727589	exon5
								ANP01656	STTASPSVEDAGEEAEK		1.69e-06	2	854.381	2	854.381	64.29	2.85664	-0.559295	-0.559295	supercont2.1,+:728004-728054	exon5
								ANP01657	STTASPSVEDAGEEAEKAESNQQSASTAS		1.04e-06	3	957.084	3	957.084	30.55	3.32416	-3.1549	-3.1549	supercont2.1,+:728004-728090	exon5
TERG_00288T0	752	84.8	5.2	Trichophyton_rubrum_CBS_118892_tubulin-tyrosine_ligase_(753_aa)	9	0.234	supercont2.1,-:737186-739845	ANP01663	SYVLPWEEGETDEDELSYLSR		2.42e-09	2	1259.06	2	1259.06	62.18	4.33788	-3.53304	-3.53304	supercont2.1,-:737654-737716	exon3
								ANP01665	MISSISELPGPDSPVLQYR		4.22e-09	2	1045.04	2	1045.04	47.34	4.10244	2.12757	2.12757	supercont2.1,-:738338-738394	exon3
								ANP01666	QKEEGSTLHGDTSGTSSTR		3.26e-06	3	659.976	3	659.976	37.42	2.19887	1.13716	1.13716	supercont2.1,-:738956-739012	exon2
								ANP01667	WSGSCFEAIDAELSGEDPGLQEHLLR	C5(Carboxymethyl)	5.2e-13	3	973.116	3	973.116	57.11	2.19795	1.01196	1.01196	supercont2.1,-:739013-739090	exon2
								ANP01668	ILYTNILDNR		1.78e-05	2	617.844	2	617.844	42.6	3.1913	0	-3.45143	supercont2.1,-:739091-739120	exon2
								ANP01669	NWTSGVDLYSINVPLEQGISK		1.68e-12	2	1160.6	2	1160.6	96.18	5.11076	0.164738	1.22497	supercont2.1,-:739127-739189	exon2
								ANP01670	DHDPVVISEAANHSVR		7.85e-08	3	582.626	3	582.626	28.76	2.7261	3.17358	3.17358	supercont2.1,-:739211-739258	exon2
								ANP01671	GPVELVISGPNYGR		1.89e-06	2	729.393	2	729.393	50.53	3.88088	3.09162	3.09162	supercont2.1,-:739367-739408	exon2
								ANP01672	AHLVGATVKPTYFHPGTLFQDDGTIHSLPR		5.56e-11	4	819.678	4	819.678	27.49	3.24811	-1.85562	-1.85562	supercont2.1,-:739511-739600	exon2
TERG_00289T0	325	36.3	5.21	Trichophyton_rubrum_CBS_118892_hypothetical_protein_(326_aa)	2	0.0892	supercont2.1,-:740154-741380	ANP01674	LPLYVLGLK		3.73e-06	2	508.331	2	508.331	33.62	2.18617	-0.361519	-0.361519	supercont2.1,-:740737-740763	exon3
								ANP01676	QIHLQYDTSFPYGTAVLGPR		0.00708736	3	755.054	3	755.054	11.97	1.4819	-1.24687	-1.24687	supercont2.1,-:740992-741133	exon2-3
TERG_00290T0	2355	261.1	5.92	Trichophyton_rubrum_CBS_118892_Ccr4-Not_transcription_complex_subunit_NOT1_(2356_aa)	42	0.2544	supercont2.1,-:742225-749588	ANP01677	LFDALLQHIQQQSPR		7.16e-12	2	897.485	2	897.485	72.96	4.78893	-1.86442	-1.86442	supercont2.1,-:742237-742281	exon5
								ANP01678	LPFIQAAPEIGR		2.28e-06	2	656.373	2	656.373	40.33	2.50741	-2.57121	-2.57121	supercont2.1,-:742282-742377	exon4-5
								ANP01679	YYLLSAIVNQLR		1.12e-07	2	726.913	2	726.913	68.73	3.72092	-1.09957	-1.09957	supercont2.1,-:742582-742617	exon4
								ANP01680	NFNTADVAIQQISEVIYNPPAR		8.48e-09	3	820.755	3	820.755	42.33	3.20032	-1.02281	-1.02281	supercont2.1,-:742801-742866	exon4
								ANP01682	ITADIVTPLQDAMIK		7.17e-07	2	814.949	2	814.949	46.86	3.51365	-1.05543	-1.05543	supercont2.1,-:742891-742935	exon4
								ANP01683	NLVLSAYPSSFQK		5.46e-09	2	727.386	2	727.386	57.69	3.41338	-3.14508	-3.14508	supercont2.1,-:743002-743040	exon4
								ANP01685	QVMNTQEDSALFFR		3.06e-07	2	843.399	2	843.399	42.32	2.35859	-2.44381	-2.44381	supercont2.1,-:743769-743810	exon3
								ANP01688	ESGIPESANTLLSDLAR		4.23e-16	2	886.957	2	886.957	55.97	3.03555	2.67959	2.67959	supercont2.1,-:743922-743972	exon3
								ANP01689	SDFSGSLDALNQWVVEEPDLSLAR		0.00251747	3	883.434	3	883.434	14.86	2.08125	1.06272	1.06272	supercont2.1,-:743994-744065	exon3
								ANP01690	SHAALELLSALMNR		3.57e-07	3	509.276	3	509.276	31.35	2.64333	-1.73048	-1.73048	supercont2.1,-:744099-744140	exon3
								ANP01691	DKSHAALELLSALMNR		0.000155423	3	590.32	3	590.32	42.09	3.36131	4.95651	4.95651	supercont2.1,-:744099-744146	exon3
								ANP01692	DSPILHSYNQVLR		7.42e-08	2	771.411	2	771.411	27.52	2.4	4.92942	4.92942	supercont2.1,-:744432-744470	exon3
								ANP01693	SEKDEHIKDIAR		4.61e-06	3	480.921	3	480.921	39.21	3.36562	2.8987	2.8987	supercont2.1,-:744471-744506	exon3
								ANP01694	IDGLVVDLQHTTR		4.09e-07	2	733.904	2	733.904	47.47	2.77315	3.59485	3.59485	supercont2.1,-:744507-744545	exon3
								ANP01695	EKIDGLVVDLQHTTR		4.83e-06	2	862.474	2	862.474	61.66	3.25811	4.41409	4.41409	supercont2.1,-:744507-744551	exon3
								ANP01696	QIPDVLQEAFPGMPNLSTPADQSAIPHPASR		3.87e-10	3	1095.55	3	1095.55	60.67	3.66381	-0.542964	-0.542964	supercont2.1,-:744639-744731	exon3
								ANP01697	GAGPTHIQHASTDSGK		1.3e-06	2	782.381	2	782.381	50.51	2.87254	0.171865	0.171865	supercont2.1,-:744732-744779	exon3
								ANP01698	EQLAIYEEFAR		0.000130613	2	684.842	2	684.842	36.34	1.3934	-2.68959	-2.68959	supercont2.1,-:744789-744821	exon3
								ANP01699	WALFIPEPYR		0.00814129	2	646.345	2	646.345	20.19	1.81648	0.172774	0.172774	supercont2.1,-:744846-744875	exon3
								ANP01700	IARPNEAFIDPSMSR		1.11e-06	3	568.624	3	568.624	30.7	3.39496	2.73127	2.73127	supercont2.1,-:744876-744920	exon3
								ANP01701	VIESQLEAR		0.00542464	2	522.788	2	522.788	28.99	2.19313	4.70721	4.70721	supercont2.1,-:744933-744959	exon3
								ANP01703	AIAEIIAPVVER		0.000167849	2	640.885	2	640.885	48.36	2.72684	3.50466	3.50466	supercont2.1,-:745272-745307	exon3
								ANP01704	LDQILVFPPSADPNTLK		0.000112453	2	934.513	2	934.513	35.35	2.78936	1.41015	1.41015	supercont2.1,-:745335-745385	exon3
								ANP01705	ISPSSIISNLPK		4.33e-05	2	628.365	2	628.365	32.21	2.53541	-2.60297	-2.60297	supercont2.1,-:745386-745421	exon3
								ANP01707	ELLIEAFDSQR		4.46e-05	2	660.841	2	660.841	48.71	2.9545	-3.35867	-3.35867	supercont2.1,-:745755-745787	exon3
								ANP01708	NLGGWLGSLTIAK		8.87e-12	2	665.381	2	665.381	27.88	2.5921	1.60475	1.60475	supercont2.1,-:745824-745862	exon3
								ANP01709	LLNAESTMNSTIDR		7.16e-12	2	782.886	2	782.886	108	3.20397	1.08937	1.08937	supercont2.1,-:745875-745916	exon3
								ANP01710	TLWAEVLR		0.00113847	2	494.285			21.62		0.0641328		supercont2.1,-:745941-745964	exon3
								ANP01711	FQSLHVGPPLRPDIYKEPDEDTHDK		0.000433101			4	734.119		3.70166		3.87919	supercont2.1,-:746148-746222	exon3
								ANP01712	LPEWVGFCSLLLQIPSLQGSNIHR	C8(Carboxymethyl)	1.29e-11	3	922.485	3	922.485	40.72	3.50257	-2.04896	-2.04896	supercont2.1,-:746364-746435	exon3
								ANP01713	FGVEAIEQLISR		4.97e-08	2	681.375	2	681.375	67.7	3.01727	-0.0402868	-0.0402868	supercont2.1,-:746436-746471	exon3
								ANP01714	VGLGMILDAVR		0.000192177	2	572.33	2	572.33	48.77	2.49322	-1.9132	-1.9132	supercont2.1,-:746502-746534	exon3
								ANP01715	MYHEELSLR		1.49e-06	3	393.196	3	393.196	54.81	2.85866	4.59731	4.59731	supercont2.1,-:746730-746756	exon3
								ANP01716	LINYGEGFDDVIEANSVR		4.18e-10	2	1005.99	2	1005.99	91.48	4.20771	0.516476	0.516476	supercont2.1,-:746811-746864	exon3
								ANP01718	GSFDLEQWVK		0.000691992	2	604.801	2	604.801	26.66	1.81522	-0.528883	-0.528883	supercont2.1,-:747093-747122	exon3
								ANP01719	AIFDLILVSPATWALPESQNFVK		3.11e-05	2	1280.2	2	1280.2	27.55	2.90184	0.0679045	0.0679045	supercont2.1,-:747447-747515	exon3
								ANP01720	SAFSSDIFDDASETVK		3.29e-09	2	859.889	2	859.889	86.13	4.39645	-2.69715	-2.69715	supercont2.1,-:747570-747617	exon3
								ANP01722	GPQSLGDPDTMLDTIK		2.87e-11	2	844.417	2	844.417	59.21	2.95537	3.74407	3.74407	supercont2.1,-:747996-748043	exon3
								ANP01724	DSTPSFIALTIER		2.04e-06	2	725.383	2	725.383	35.97	2.29263	-2.37387	-0.0718836	supercont2.1,-:748221-748259	exon3
								ANP01725	DFDLSTFLDHFK		4.52e-08	2	742.856	2	742.856	52.72	2.28251	-0.212326	-0.212326	supercont2.1,-:748469-748504	exon2
								ANP01726	IAETIDTSEGDIFR		5.01e-11	2	783.884	2	783.884	81.49	3.95075	-2.82139	-2.82139	supercont2.1,-:748505-748546	exon2
								ANP01727	NVDNSGNYPLLVQEVQK		6.01e-09	2	958.985	2	958.985	73.92	3.82077	-4.78927	-4.78927	supercont2.1,-:748577-748627	exon2
TERG_00292T0	188	21.2	6.11	Trichophyton_rubrum_CBS_118892_hypothetical_protein_(189_aa)	3	0.2128	supercont2.1,-:754891-755639	ANP01728	MSLGAFETSLPLR		1.02e-08	2	711.374	2	711.374	44.17	2.79296	-2.96803	-2.96803	supercont2.1,-:755382-755420	exon1
								ANP01729	NTQNNAQGFGYGYGR		9.58e-06	2	823.869	2	823.869	55.08	3.21757	-0.00790882	-0.00790882	supercont2.1,-:755439-755483	exon1
								ANP01730	HTPSPLNQNHPR		5.59e-06	3	466.573	3	466.573	37.16	2.43677	1.01798	1.01798	supercont2.1,-:755505-755540	exon1
TERG_00296T0	439	48.9	7.9	Trichophyton_rubrum_CBS_118892_hypothetical_protein_(440_aa)	2	0.0797	supercont2.1,+:762866-764185	ANP01732	TFFQPLDDIIDANEDISPHLR		1.91e-06	3	819.406	3	819.406	30.31	2.05549	-3.0103	-2.93522	supercont2.1,+:763292-763354	exon1
								ANP01733	DFTALDEYLQNLAK		3.39e-08	2	820.91	2	820.91	46.46	2.66112	-2.62839	-2.62839	supercont2.1,+:763883-763924	exon1
TERG_00297T0	518	57.5	6.15	Trichophyton_rubrum_CBS_118892_galactokinase_(519_aa)	7	0.2606	supercont2.1,-:764603-766276	ANP01735	LTGAGWGGCTVHMVPLEK	C9(Carboxymethyl)	0.000540292	3	638.644	3	638.644	19.54	2.7949	-3.69681	-3.69681	supercont2.1,-:764817-764870	exon2
								ANP01736	LDQQNLGYLGQLLNESQASCR	C20(Carboxymethyl)	4.23e-16	2	1204.58	2	1204.58	87.44	4.65241	1.57866	1.57866	supercont2.1,-:764949-765011	exon2
								ANP01737	ADIAELLQLTVPQVEEQFLSSFPVEAER		2.87e-05	3	1053.55	3	1053.55	17	2.10455	1.38742	1.38742	supercont2.1,-:765099-765182	exon2
								ANP01740	VAECTLAAVILAQK	C4(Carboxymethyl)	1.61e-05	2	744.409	2	744.409	49.89	2.77656	-2.14742	-2.14742	supercont2.1,-:765354-765395	exon2
								ANP01741	AVGVYSGGMDQAASIFSR		6.75e-11	2	908.436	2	908.436	88.94	2.87607	-2.48234	-2.48234	supercont2.1,-:765549-765658	exon1-2
								ANP01742	EVDIDASRPDWVNYFK		2.31e-07	2	977.467	2	977.467	66.5	3.03344	-3.81972	-3.81972	supercont2.1,-:765875-765922	exon1
								ANP01744	DVYVAEPDTQQSLEPEQQTR		1.06e-11	2	1167.05	2	1167.05	80.36	4.4811	-0.0442148	-0.0442148	supercont2.1,-:766178-766237	exon1
TERG_00299T0	701	75.8	8.73	Trichophyton_rubrum_CBS_118892_acetolactate_synthase_(702_aa)	12	0.3181	supercont2.1,+:767411-769783	ANP01747	HAPALDDSFVGLSGGQIFHEMMLR		4.58e-14	3	876.759	3	876.759	59.05	5.43624	-3.29999	-3.29999	supercont2.1,+:767750-767887	exon2-3
								ANP01748	EAFEIATSGRPGPVLVDLPK		0.000102814	2	1048.58	2	1048.58	29.06	3.03769	2.9211	2.9211	supercont2.1,+:768339-768398	exon4
								ANP01750	AIPMTSSIPAHPSAASIAAR		3.36e-12	2	975.014	2	975.014	71.57	4.38909	-3.04414	-3.04414	supercont2.1,+:768426-768485	exon4
								ANP01752	ANIPVTTTLQGLGGFDELDPK		1.37e-10	2	1093.57	2	1093.57	97.66	4.81936	-4.37701	-4.37701	supercont2.1,+:768630-768692	exon4
								ANP01754	GGIVHFEVIPK		0.000170894	3	399.233	3	399.233	24.24	2.25112	0.477981	0.555734	supercont2.1,+:768852-768884	exon4
								ANP01755	QTANGLIKPQAVIETLSELTAHR		0.00297038			4	623.347		1.81008		-1.28217	supercont2.1,+:769047-769115	exon4
								ANP01756	TVITTGVGQHQMWAAQHFR		6.67e-08	3	723.364	3	723.364	30.84	2.32435	-2.21816	-2.21816	supercont2.1,+:769125-769181	exon4
								ANP01757	SMITSGGLGTMGYGLPSAIGAK		4.09e-11	2	1035.02	2	1035.02	94.61	4.80605	-4.22168	-4.22168	supercont2.1,+:769197-769262	exon4
								ANP01758	VIVLNNEEQGMVTQWQSLFYEDR		7.06e-05			3	933.451		2.211		-2.42421	supercont2.1,+:769368-769436	exon4
								ANP01759	VSEAMGVQAR		1.11e-06	2	524.267	2	524.267	56.32	2.1705	2.10858	2.10858	supercont2.1,+:769476-769505	exon4
								ANP01760	RCLTPDQVESSLQWLINSEGPALLEIATDK	C2(Carboxymethyl)	2.65e-09	3	1128.9	3	1128.9	80.16	5.1013	-3.28425	-1.51401	supercont2.1,+:769506-769595	exon4
								ANP01761	CLTPDQVESSLQWLINSEGPALLEIATDK	C1(Carboxymethyl)	3.64e-09	3	1076.87	3	1076.87	52.2	4.43028	-0.82396	-0.877757	supercont2.1,+:769509-769595	exon4
TERG_00300T0	502	56.1	5.77	Trichophyton_rubrum_CBS_118892_RING_finger_domain-containing_protein_(503_aa)	1	0.0538	supercont2.1,+:771390-772898	ANP01762	ETTNLADIILGALVFPAISAGMGGLLK		0.000129779	3	895.833	3	895.833	11.69	3.1645	-1.96403	-1.96403	supercont2.1,+:772596-772676	exon1
TERG_00301T0	183	21.1	10.89	Trichophyton_rubrum_CBS_118892_hypothetical_protein_(184_aa)	6	0.2514	supercont2.1,+:773316-773944	ANP01763	AWQLYTAK		0.00367693	2	490.765	2	490.765	22.59	1.70566	2.20444	2.20444	supercont2.1,+:773705-773728	exon2
								ANP01764	RAHQLELER		0.000148471	3	384.549	3	384.549	32.19	2.96041	3.84511	3.84511	supercont2.1,+:773735-773761	exon2
								ANP01765	AHQLELER		0.000289231	2	498.268	2	498.268	41.57	2.20832	0.928578	0.928578	supercont2.1,+:773738-773761	exon2
								ANP01767	DACEELR	C3(Carboxymethyl)	0.00450325	2	447.188	2	447.188	36.27	1.62386	0.340619	1.22077	supercont2.1,+:773780-773800	exon2
								ANP01768	GVFSDGVPIEYGR		8.5e-08	2	698.351	2	698.351	79.01	3.15621	3.88717	3.88717	supercont2.1,+:773852-773890	exon2
								ANP01769	DGWDYSWKP		0.00131109	2	577.252	2	577.252	18.46	1.44388	1.27213	1.27213	supercont2.1,+:773915-773941	exon2
TERG_00302T0	199	22.1	5.69	Trichophyton_rubrum_CBS_118892_hypothetical_protein_(200_aa)	8	0.4925	supercont2.1,-:774744-775716	ANP01770	AALLTFGK		0.000553054	2	410.751	2	410.751	33.92	1.69421	1.93115	1.93115	supercont2.1,-:774774-774797	exon5
								ANP01771	YLECSSLTGEGVDDVFEAATR	C4(Carboxymethyl)	4.53e-13	2	1160.51	2	1160.51	83.71	4.37751	-2.95393	-2.95393	supercont2.1,-:774798-774860	exon5
								ANP01772	DGSEAAAEIGAR		3.28e-05	2	573.773	2	573.773	23.84	2.09028	-0.00840498	-0.00840498	supercont2.1,-:774864-774899	exon5
								ANP01773	EDPLAIEEMR		0.00671508	2	601.792	2	601.792	18.22	1.70163	4.49253	4.49253	supercont2.1,-:774930-774959	exon5
								ANP01774	CPDVPIILVGLK	C1(Carboxymethyl)	6.76e-06	2	662.883	2	662.883	41.39	2.60496	4.01104	4.01104	supercont2.1,-:774972-775007	exon5
								ANP01775	WIEEANER		0.00175293	2	523.749	2	523.749	27.41	2.09981	0.0784703	0.0784703	supercont2.1,-:775008-775031	exon5
								ANP01776	SVQLALWDTAGQEDYER		1.38e-11	2	990.971	2	990.971	105.44	5.10927	2.93063	2.74408	supercont2.1,-:775185-775235	exon4
								ANP01777	AQQQADNVMR	N-Term(Acetyl); M9(Oxidation)	3.01e-05	2	609.78			17.28		0.0428606		supercont2.1,-:775684-775713	exon1
TERG_00305T0	883	100.1	5.64	Trichophyton_rubrum_CBS_118892_vacuolar_protein_sorting-associated_protein_VPS35_(884_aa)	26	0.4292	supercont2.1,-:782314-785363	ANP01783	YLNGLIELIYSNLQSNQTEGIPSSSLESPR		2.69e-05	3	1108.23	3	1108.23	43.28	4.36762	-3.45058	-3.3542	supercont2.1,-:782392-782481	exon7
								ANP01784	YVYYFDQQNETVTTK		2.35e-09	2	949.942	2	949.942	48.71	3.34617	-1.58323	-1.58323	supercont2.1,-:782482-782526	exon7
								ANP01785	AQFQAVCIISSALHGCR	C7(Carboxymethyl); C16(Carboxymethyl)	0.00206368	3	640.64			21.48		-3.41549		supercont2.1,-:782866-782916	exon6
								ANP01786	VNSGCADLALR	C5(Carboxymethyl)	0.000121038	2	588.786	2	588.786	64.86	2.4257	-2.45313	-2.45313	supercont2.1,-:783028-783060	exon6
								ANP01787	FMHQCVSSLYQR	C5(Carboxymethyl)	5.54e-11	3	519.573	3	519.573	27.3	2.8107	3.77147	3.77147	supercont2.1,-:783061-783096	exon6
								ANP01788	EHFDDNWQPQSSALFR		9.6e-09	2	988.944	2	988.944	68.46	4.64539	-3.82336	-3.82336	supercont2.1,-:783097-783144	exon6
								ANP01789	YTTPSIITSSIK		0.000557839	2	655.867	2	655.867	10.87	0.949343	4.73803	4.73803	supercont2.1,-:783169-783204	exon6
								ANP01791	IVHLVQGPDNDTQLK		1.05e-05	2	838.954	2	838.954	45.75	3.4882	2.04392	2.04392	supercont2.1,-:783315-783359	exon5
								ANP01792	GGETEETIEEQGWLAR		6.28e-08	2	902.919	2	902.919	74.05	4.18312	-2.05221	-2.05221	supercont2.1,-:783360-783407	exon5
								ANP01793	EGMQQPAGYPGAQSQR		1.21e-06	2	852.894	2	852.894	33.25	2.76257	2.82555	2.82555	supercont2.1,-:783411-783458	exon5
								ANP01794	TSITSPENLDNVLQILR		4.23e-16	2	957.024	2	957.024	99.78	3.83805	3.32264	3.32264	supercont2.1,-:783471-783521	exon5
								ANP01795	AVAGEVAR		0.000127701	2	386.72	2	386.72	52.74	1.82088	1.49673	1.49673	supercont2.1,-:783540-783563	exon5
								ANP01796	LYEIFYDQVLNLVK		3.76e-11	2	878.979	2	878.979	83.07	3.27556	-0.337894	-0.337894	supercont2.1,-:783955-783996	exon3
								ANP01797	DTKPESVEDQQESEEATFLPGNIK		1.45e-09	3	897.757	3	897.757	65.68	3.67326	1.43468	-2.1313	supercont2.1,-:783997-784068	exon3
								ANP01798	ERGEAPPASDEQK		0.00475458	3	471.893			25.6		2.02298		supercont2.1,-:784144-784182	exon3
								ANP01799	LLENLQLSK		0.00237328	2	529.319	2	529.319	26.97	2.12779	4.40363	4.40363	supercont2.1,-:784183-784209	exon3
								ANP01800	IVIGLMDR		0.00312918	2	458.769	2	458.769	19.77	1.63575	-0.135487	-0.135487	supercont2.1,-:784294-784317	exon3
								ANP01802	VFPDEYHLHTLDSMLSAIAR		0.000141662	3	772.386	3	772.386	10.27	1.48693	-2.74091	-2.74091	supercont2.1,-:784345-784404	exon3
								ANP01803	DVLAQEYLLEVITK		1.46e-07	2	817.454	2	817.454	64.73	4.2735	-2.46087	-2.46087	supercont2.1,-:784405-784501	exon2-3
								ANP01804	SVILQPLLEQVVQCR	C14(Carboxymethyl)	1.22e-11	3	594.996	3	594.996	57.15	2.96351	-2.04071	-2.04071	supercont2.1,-:784502-784546	exon2
								ANP01805	LSQLVDLEAYK		2.33e-06	2	639.849	2	639.849	44.21	2.77372	-3.11777	-3.31144	supercont2.1,-:784547-784579	exon2
								ANP01806	ELELLVGSNLVR		5.84e-06	2	671.389	2	671.389	26.29	2.49291	-1.73862	-1.73862	supercont2.1,-:784580-784615	exon2
								ANP01807	YYLSGQAR		0.00526771			2	479.242		2.02223		-1.30294	supercont2.1,-:784775-784798	exon2
								ANP01808	ESHPVNHLADLYELVQYAGNIVPR		7.02e-08	4	684.353	4	684.353	30.06	2.48846	0.391381	-1.22597	supercont2.1,-:784928-784999	exon2
								ANP01809	LLEEALGVVR		1.16e-07	2	549.829	2	549.829	68.4	2.92264	-1.03568	-1.03568	supercont2.1,-:785295-785324	exon1
								ANP01810	ASAPHVPEDQSR	N-Term(Acetyl)	2.93e-05	2	668.318			35.7		0.482894		supercont2.1,-:785325-785360	exon1
TERG_00309T0	333	36.3	5.03	Trichophyton_rubrum_CBS_118892_hypothetical_protein_(334_aa)	8	0.5225	supercont2.1,+:790117-791203	ANP01812	VAIMGHSTGSQDVLHYLYTQAPEQTR		2.97e-11	3	968.143	3	968.143	72.26	4.93153	-0.611384	-0.611384	supercont2.1,+:790520-790597	exon2
								ANP01813	SAVDGAILQAPVSDR		1.88e-05	2	749.899	2	749.899	40.44	3.54556	2.78743	2.78743	supercont2.1,+:790598-790642	exon2
								ANP01814	ESTLSILETGTANDSAEVVNEIFYELVDVAK		0.00293006			3	1119.56		1.83669		2.0108	supercont2.1,+:790643-790735	exon2
								ANP01815	SNLNETDNGYILPVSMTSR		1.83e-14	2	1056	2	1056	85.61	4.52552	-3.53184	-3.53184	supercont2.1,+:790736-790792	exon2
								ANP01816	FLSLTSPDSPESPLEDDLFSSDLEDK		2.96e-10	2	1442.16	2	1442.16	72.34	3.45356	-3.18891	-3.18891	supercont2.1,+:790832-790909	exon2
								ANP01817	GSILVLPGGSDEYIPEWVDMESLLK		9.91e-10	2	1374.19	2	1374.19	55.75	3.51071	-0.94473	-0.94473	supercont2.1,+:790958-791032	exon2
								ANP01818	AGSDNPAIWNENSGVVPGAR		2e-12	2	1005.98	2	1005.98	84.22	4.82651	-0.838904	-0.838904	supercont2.1,+:791054-791113	exon2
								ANP01819	WQVKPIQDLLSR		2.28e-06	3	494.951	3	494.951	28.02	2.38965	-2.1764	-2.1764	supercont2.1,+:791132-791167	exon2
TERG_00310T0	277	31.2	8.76	Trichophyton_rubrum_CBS_118892_dolichol-phosphate_mannosyltransferase_(278_aa)	11	0.491	supercont2.1,-:791473-792433	ANP01820	GVFTLWLK		0.000432366	2	482.286	2	482.286	44.91	2.62407	-2.37904	-2.37904	supercont2.1,-:791479-791502	exon2
								ANP01821	LGGEEIVEYLK		1.9e-07	2	625.336	2	625.336	72.26	3.18836	-1.86156	-1.86156	supercont2.1,-:791503-791535	exon2
								ANP01822	VEECPITFVDR	C4(Carboxymethyl)	1.04e-06	2	683.324	2	683.324	55.36	2.86069	3.77529	3.77529	supercont2.1,-:791554-791586	exon2
								ANP01824	GANLIADVALMPGVSDLTGSFR		3.94e-14	2	1102.57	2	1102.57	71.94	3.50805	-4.29938	-4.29938	supercont2.1,-:791692-791757	exon2
								ANP01825	GGVYGWDLIR		2.7e-07	2	568.297	2	568.297	54.8	2.78771	-2.72774	-2.72774	supercont2.1,-:791773-791802	exon2
								ANP01826	ADIVTGTR		0.00228697	2	416.731	2	416.731	36.63	2.19161	1.75887	1.75887	supercont2.1,-:791827-791850	exon2
								ANP01827	IQESTKADIVTGTR		0.00951849	3	506.944	3	506.944	18.93	2.10514	4.11348	4.11348	supercont2.1,-:791827-791868	exon2
								ANP01829	LGLGTAYVHGLK		5.34e-06	3	410.242	3	410.242	33.22	2.20378	4.52683	4.52683	supercont2.1,-:791947-791982	exon2
								ANP01830	QLQAAYGEQHIVLKPR		2.95e-09	2	926.017	2	926.017	90.93	4.2171	1.39614	1.39614	supercont2.1,-:791992-792039	exon2
								ANP01831	LNWEVIIVDDGSPDGTLEIAK		6.97e-05	2	1142.59	2	1142.59	27.94	3.20951	-1.35397	-1.35397	supercont2.1,-:792040-792102	exon2
								ANP01832	NLPIICWLIEK	C6(Carboxymethyl)	1.44e-06	2	700.386	2	700.386	46.37	2.61762	0.167922	0.167922	supercont2.1,-:792248-792280	exon1
TERG_00311T0	449	49.4	6.42	Trichophyton_rubrum_CBS_118892_hypothetical_protein_(450_aa)	10	0.3163	supercont2.1,+:792825-794395	ANP01836	SPTPAAASGNR		1.63e-05	2	514.761	2	514.761	44.41	1.52291	2.42612	2.42612	supercont2.1,+:793050-793082	exon3
								ANP01837	QPEIFHPLSQLEIPLPFR		1.23e-05	3	721.067	3	721.067	10.54	2.04433	2.09941	2.09941	supercont2.1,+:793188-793241	exon3
								ANP01838	SEFPSLLPGQPLESALQQLNDLCK	C23(Carboxymethyl)	1.52e-07	2	1343.18	2	1343.18	49.18	2.21261	0.620821	0.620821	supercont2.1,+:793242-793313	exon3
								ANP01839	LQSIGFSDTR		0.000635893	2	562.292			10.57		2.32381		supercont2.1,+:793608-793637	exon3
								ANP01840	GITGLYDLGLEAR		1.34e-06	2	689.373	2	689.373	47.62	2.99975	0.651216	0.651216	supercont2.1,+:793641-793679	exon3
								ANP01841	HIIRPGVGAEEK		0.00187283			3	435.914		2.0127		0.442056	supercont2.1,+:793683-793718	exon3
								ANP01842	LGDLGIR		0.00607409	2	372.224	2	372.224	26.33	1.36454	0.036328	0.036328	supercont2.1,+:793737-793757	exon3
								ANP01843	VVNALVEMGDLEAAR		5.87e-08	2	793.917	2	793.917	78.27	3.55325	3.47265	3.47265	supercont2.1,+:793758-793802	exon3
								ANP01844	DLFSSVSSPSANIVEPLLK		1.74e-08	2	1002.04	2	1002.04	54.03	3.82303	0.300546	0.300546	supercont2.1,+:793905-793961	exon3
								ANP01845	FDEAVTGWNELLK		3.59e-07	2	761.385	2	761.385	34.75	2.58448	3.00962	3.00962	supercont2.1,+:793977-794015	exon3
TERG_00312T0	326	36.7	8.38	Trichophyton_rubrum_CBS_118892_hypothetical_protein_(327_aa)	3	0.1227	supercont2.1,-:794695-795777	ANP01846	DLSVLLLSLR		2.51e-07	2	564.852	2	564.852	67.61	2.29344	-1.83545	-1.83545	supercont2.1,-:795292-795321	exon2
								ANP01847	SSRPETLSDSASK		3.85e-06	2	682.836	2	682.836	48.23	2.86452	-0.31844	-0.31844	supercont2.1,-:795322-795360	exon2
								ANP01848	LRPAVVDPLEQAGFVSK		1.36e-08	2	913.509	2	913.509	68.48	3.30464	-3.59115	-3.59115	supercont2.1,-:795682-795732	exon1
TERG_00314T0	294	30.8	9.36	Trichophyton_rubrum_CBS_118892_3-oxoacyl-(acyl-carrier-protein)_reductase_(295_aa)	12	0.6803	supercont2.1,+:797657-798844	ANP01849	LNQVSAHLNYPQGMLAGQVAIITGSGQGIGAEAAR		5.49e-10	3	1164.94	3	1164.94	78.83	4.65718	0.0557449	0.0557449	supercont2.1,+:797675-797779	exon1
								ANP01850	VVVADLDSSK		4.37e-05	1	1032.56	1	1032.56	56.45	2.16938	1.23285	1.23285	supercont2.1,+:797804-797947	exon1-2
								ANP01851	AINDASPGR		0.000560747	2	450.731	2	450.731	53.72	2.20245	2.27843	2.27843	supercont2.1,+:797966-797992	exon2
								ANP01852	AIAVAGDVQDGAYLK		4.65e-10	2	745.894	2	745.894	60.1	4.58811	-3.10175	-3.10175	supercont2.1,+:797993-798037	exon2
								ANP01853	IHIIVNNAGFTWDGVIHK		3.63e-07	3	678.704	3	678.704	32.24	2.32476	2.83179	2.83179	supercont2.1,+:798077-798130	exon2
								ANP01854	QWDTIIAVHATAPFK		1.59e-07	2	849.453	2	849.453	39.85	3.64479	-1.95753	-1.95753	supercont2.1,+:798241-798285	exon3
								ANP01855	LVQAAAPYFR		0.00182285	2	568.318	2	568.318	29.58	2.05341	1.85789	1.85789	supercont2.1,+:798286-798315	exon3
								ANP01856	IIVNISSTSGIHGNAGQANYAVGK		5.01e-11	3	791.083	3	791.083	50.7	3.26936	-1.34668	-1.34668	supercont2.1,+:798337-798499	exon3-4
								ANP01857	ETGAFITTPDGEK		6.79e-06	2	683.332	2	683.332	50.87	2.65163	2.20876	2.20876	supercont2.1,+:798614-798652	exon4
								ANP01858	VALGIPGSQLPTQTK		2.25e-07	2	755.432	2	755.432	34.1	3.03014	-4.18539	-4.18539	supercont2.1,+:798653-798697	exon4
								ANP01859	ESQEAYADIPLR		1.25e-06	2	696.346	2	696.346	68.54	2.30232	3.75596	3.75596	supercont2.1,+:798698-798733	exon4
								ANP01860	SILGVCSPLFSYVNGQTIMVTGGR	C6(Carboxymethyl)	8.88e-12	2	1279.14	2	1279.14	80.55	4.4263	0.720782	0.720782	supercont2.1,+:798764-798835	exon4
TERG_00320T0	799	91	8.25	Trichophyton_rubrum_CBS_118892_CMGC/DYRK/PRP4_protein_kinase_(800_aa)	1	0.025	supercont2.1,-:816424-818946	ANP01861	AGMTEINILQLLQNADPEDK		2.53e-09	2	1107.06	2	1107.06	39.4	2.96232	-0.368786	-0.368786	supercont2.1,-:817216-817275	exon3
TERG_00323T0	166	18.2	5.19	Trichophyton_rubrum_CBS_118892_DNA_damage_response_protein_(167_aa)	6	0.4759	supercont2.1,+:822756-823450	ANP01864	KPVTLPTAPPPTVFR		6.91e-08	2	810.975	2	810.975	56.2	3.36701	-2.71522	-2.71522	supercont2.1,+:823007-823051	exon3
								ANP01865	TFSPTDLLPFNGK		7.19e-06	2	718.877	2	718.877	40.55	2.20792	3.72911	3.72911	supercont2.1,+:823052-823090	exon3
								ANP01867	NFYGPGGPYENFAGR		1.39e-08	2	823.374	2	823.374	57.23	2.84284	0.666422	0.666422	supercont2.1,+:823151-823252	exon3-4
								ANP01868	GLACQSFDEEMLTK	C4(Carboxymethyl)	7.32e-09	2	815.357	2	815.357	54.76	3.3976	-4.02064	-4.02064	supercont2.1,+:823265-823306	exon4
								ANP01869	GLGQEELENLR		0.000127727	2	629.326	2	629.326	35	2.11217	0.736976	0.736976	supercont2.1,+:823337-823369	exon4
								ANP01871	LVAEGDPALKA		0.00734051	2	542.308	2	542.308	27.01	1.99563	4.25694	4.25694	supercont2.1,+:823415-823447	exon4
TERG_00324T0	504	56.9	7.65	Trichophyton_rubrum_CBS_118892_hypothetical_protein_(505_aa)	6	0.1667	supercont2.1,-:823801-825596	ANP01872	LQSLGEWAWDQLK		6.18e-07	2	787.401	2	787.401	37.34	3.23936	-3.87054	-3.87054	supercont2.1,-:823888-823926	exon5
								ANP01873	DINFNTWSK		0.00125624	2	562.772	2	562.772	27.29	1.13673	0.014168	0.014168	supercont2.1,-:824071-824097	exon5
								ANP01874	AGGPDFTSITNYLAQVTGSMK		1.01e-13	2	1079.52	2	1079.52	95.72	4.71578	-3.63099	-3.63099	supercont2.1,-:824098-824160	exon5
								ANP01876	EWIFDSWSDSQLK		0.000203473	2	820.886	2	820.886	33.02	2.219	3.99996	3.99996	supercont2.1,-:825079-825175	exon3-4
								ANP01877	TVEEVSDSFNDAK		2.03e-08	2	720.828	2	720.828	67.97	2.87648	-0.506391	-0.506391	supercont2.1,-:825176-825214	exon3
								ANP01878	WLSDHDVPYPSPADR		7.49e-07	2	877.907	2	877.907	43.85	3.01849	-3.90064	-3.90064	supercont2.1,-:825278-825392	exon2-3
TERG_00331T0	150	16.4	9.13	Trichophyton_rubrum_CBS_118892_golgi_apparatus_membrane_protein_TVP18_(151_aa)	1	0.0467	supercont2.1,-:843708-844397	ANP01881	TLAEEFR		0.00738695	2	433.225			34.95		1.94869		supercont2.1,-:844374-844394	exon1
TERG_00332T0	125	13.8	4.61	Trichophyton_rubrum_CBS_118892_nuclear_transport_factor_2_(126_aa)	7	0.424	supercont2.1,-:845415-846353	ANP01882	LTTLPFQK		0.00276774	1	947.557	1	947.557	34.58	1.95305	1.25878	1.25878	supercont2.1,-:845702-845828	exon4-5
								ANP01883	DQSMLTFETTSIQGATAILEKLTTLPFQK		5.82e-05	3	1071.56	3	1071.56	13.46	2.42769	0.518226	0.518226	supercont2.1,-:845702-845891	exon4-5
								ANP01884	DQSMLTFETTSIQGATAILEK		9.48e-16	2	1142.58	2	1142.58	118.5	6.13667	3.2011	3.52422	supercont2.1,-:845829-845891	exon4
								ANP01885	SNLGSLYR		0.00638753	1	909.48	1	909.48	24.48	1.54386	1.165	1.165	supercont2.1,-:845892-845988	exon3-4
								ANP01886	QFVEFYYK		0.00877255	2	562.276	2	562.276	27.91	1.28194	-0.723545	-0.723545	supercont2.1,-:846007-846030	exon3
								ANP01887	ADFTQVAKQFVEFYYK	N-Term(Acetyl)	1.24e-05	2	1013.5			39.21		-1.64625		supercont2.1,-:846007-846350	exon1-3
								ANP01888	ADFTQVAK	N-Term(Acetyl)	0.00120395	1	921.47			45.55		2.60558		supercont2.1,-:846171-846350	exon1-2
TERG_00333T0	826	91.4	6.6	Trichophyton_rubrum_CBS_118892_hypothetical_protein_(827_aa)	1	0.0291	supercont2.1,-:846716-849196	ANP01890	TIENLLTFGPEFEALLMSRPEVQK		9.39e-06	3	921.486	3	921.486	16.09	1.81999	0.149527	0.149527	supercont2.1,-:848096-848167	exon1
TERG_00334T0	1194	131.5	9.09	Trichophyton_rubrum_CBS_118892_hypothetical_protein_(1195_aa)	4	0.108	supercont2.1,-:850186-853878	ANP01893	HAGEHPKEDGTSPGPESGSSATPR		0.00366797	4	597.777	4	597.777	17.42	1.29514	1.55178	1.55178	supercont2.1,-:850663-850734	exon3
								ANP01894	SNSNPKPGEVTPPGSSSPETASITTASEGR		1.14e-10	3	981.468	3	981.468	59.08	4.46316	-2.426	-2.426	supercont2.1,-:850735-850824	exon3
								ANP01896	HTGLQPTDALHSTATATFDDLLDGAETSASLPLR		2.54e-09	3	1174.92	3	1174.92	90.01	5.79453	2.32854	2.32854	supercont2.1,-:851738-851839	exon2
								ANP01900	SPSPAPMQSTSTSPSPSPSPDPKPVSSVATSSSITSTLSVK		0.00124346			6	667.337		1.97971		2.84613	supercont2.1,-:853201-853323	exon1
TERG_00336T0	168	18.3	6.6	Trichophyton_rubrum_CBS_118892_mitochondrial_F1F0_ATP_synthase_subunit_Atp14_(169_aa)	3	0.2381	supercont2.1,-:856047-856914	ANP01901	FSPPAAPQSPEEANISADLK		2.39e-10	2	1035.01	2	1035.01	64.75	2.0383	-1.58572	-2.18079	supercont2.1,-:856161-856220	exon4
								ANP01902	ELAAYKPSPR		4.37e-05	2	566.312	2	566.312	44.77	2.60052	0.912103	0.912103	supercont2.1,-:856254-856283	exon4
								ANP01903	ADPVQDLYIR		3.69e-05	2	595.316	2	595.316	35.95	2.77372	2.33703	2.33703	supercont2.1,-:856284-856428	exon3-4
TERG_00337T0	352	38.3	7.8	Trichophyton_rubrum_CBS_118892_transcription_initiation_factor_IIB_(353_aa)	2	0.1477	supercont2.1,+:857673-858791	ANP01905	INSVVSSGGVPDPNDAYTGTTSTKPSDLCNR	C29(Carboxymethyl)	1.21e-06	3	1070.83	3	1070.83	34.62	2.71259	-0.73314	-0.73314	supercont2.1,+:858333-858485	exon1-2
								ANP01906	FCNLLDLPFQVTNVSSLLADR	C2(Carboxymethyl)	2.95e-11	2	1212.11	2	1212.11	85.7	4.75082	1.33318	-3.346	supercont2.1,+:858486-858548	exon2
TERG_00338T0	897	100.7	6.89	Trichophyton_rubrum_CBS_118892_glutamate_carboxypeptidase_(898_aa)	4	0.068	supercont2.1,-:859915-862665	ANP01908	GSPLFEPILLHILNR		0.00174666	3	573.668	3	573.668	11.27	1.08126	-2.94649	-2.94649	supercont2.1,-:860788-860832	exon1
								ANP01909	VNLMNLQDEVER		0.0002477	2	730.36	2	730.36	22.22	1.52533	-5.10568	-5.10568	supercont2.1,-:861169-861204	exon1
								ANP01910	DWVGGVPDISEWWTGNEDSPK		3.67e-11	2	1187.53	2	1187.53	71.94	3.50819	-0.227507	-0.227507	supercont2.1,-:861205-861267	exon1
								ANP01911	YIPTFTLPSFDFR		0.00116404	2	802.409	2	802.409	28.53	1.81987	-3.13163	-3.13163	supercont2.1,-:862216-862254	exon1
TERG_00339T0	458	50.5	6.77	Trichophyton_rubrum_CBS_118892_hydroxymethylglutaryl-CoA_synthase_(459_aa)	25	0.6463	supercont2.1,+:864218-865814	ANP01912	SSRPQNIGIK	N-Term(Acetyl)	0.000683285	2	571.32			30.12		0.269787		supercont2.1,+:864221-864250	exon1
								ANP01913	ALEIYFPSQCVDQAELEK	C10(Carboxymethyl)	3.17e-16	2	1071.01	2	1071.01	85.2	4.88432	-0.596118	-0.596118	supercont2.1,+:864251-864379	exon1-2
								ANP01914	ALEIYFPSQCVDQAELEKFDGVSQGK	C10(Carboxymethyl)	2.43e-08	2	1480.2	2	1480.2	84.43	3.07914	-3.55041	-3.55041	supercont2.1,+:864251-864403	exon1-2
								ANP01916	MSFCDDREDIYSICLTTVSSLLR	C4(Carboxymethyl); C14(Carboxymethyl)	3.71e-08	2	1392.14	2	1392.14	74.65	3.70779	4.058	4.058	supercont2.1,+:864431-864570	exon2-3
								ANP01917	EDIYSICLTTVSSLLR	C7(Carboxymethyl)	9.67e-13	2	935.976	2	935.976	100.87	3.78784	-1.43761	-1.43761	supercont2.1,+:864452-864570	exon2-3
								ANP01919	LEVGTETMLDK		9.58e-08	2	618.312	2	618.312	48.39	2.09484	-0.926438	-0.926438	supercont2.1,+:864604-864636	exon3
								ANP01920	LEVGTETMLDKSK		0.0034766	2	725.88	2	725.88	30.44	2.33833	4.80321	4.80321	supercont2.1,+:864604-864642	exon3
								ANP01921	DAIVVAGDIALYK		2.87e-08	2	674.38	2	674.38	67.79	3.36834	-0.299949	0.342647	supercont2.1,+:864790-864828	exon3
								ANP01922	GTYITHAYDFYKPDLTSEYPYVDGHYSIR		5.43e-15	3	1157.88	3	1157.88	85.91	4.71675	2.59227	1.74431	supercont2.1,+:864919-865005	exon3
								ANP01923	CYTEAVDACYK	C1(Carboxymethyl); C9(Carboxymethyl)	1.72e-10	2	691.268	2	691.268	50	3.32951	-0.445353	-0.543214	supercont2.1,+:865006-865038	exon3
								ANP01924	VLKGQNGDSNGIVDK		3.55e-07	2	772.41	2	772.41	81.31	3.68886	3.68114	3.68114	supercont2.1,+:865060-865104	exon3
								ANP01925	GQNGDSNGIVDK		5.48e-06	2	602.284	2	602.284	43.61	2.5852	0.226982	0.226982	supercont2.1,+:865069-865104	exon3
								ANP01926	SKTPLDRFDHILFHAPTCK	C18(Carboxymethyl)	3.79e-07			5	457.639		2.90019		4.67258	supercont2.1,+:865105-865161	exon3
								ANP01927	TPLDRFDHILFHAPTCK	C16(Carboxymethyl)	0.000550357	5	414.613	5	414.613	24.13	2.36037	4.74144	4.97107	supercont2.1,+:865111-865161	exon3
								ANP01928	FDHILFHAPTCK	C11(Carboxymethyl)	4.23e-16	3	496.245	3	496.245	39.41	2.82496	4.51139	4.51139	supercont2.1,+:865126-865161	exon3
								ANP01929	LLYNDYLDNPEHPAFAEVAPEVR		4.23e-16	3	891.438	3	891.438	59.19	4.58047	0.558192	0.558192	supercont2.1,+:865186-865254	exon3
								ANP01931	TFMALSK		0.00555397	2	399.215	2	399.215	38.17	1.86609	-3.00773	0.343826	supercont2.1,+:865300-865320	exon3
								ANP01932	FNECIAPSIEVATQCGNMYCASVYGGLVSLLSK	C4(Carboxymethyl); C15(Carboxymethyl); C20(Carboxymethyl)	1.46e-05	3	1214.56	3	1214.56	45.85	3.91352	4.59315	4.59315	supercont2.1,+:865327-865425	exon3
								ANP01933	VPFDPAQPK		1.98e-05	2	499.77	2	499.77	35.17	2.63474	2.25693	2.25693	supercont2.1,+:865426-865452	exon3
								ANP01935	VGVFSYGSGLASSMFSVK		3.82e-16	2	911.958	2	911.958	86.88	2.99231	2.42617	2.42617	supercont2.1,+:865456-865509	exon3
								ANP01936	VVGDVSNIVK		2.14e-06	2	515.301	2	515.301	50.04	3.25713	1.54787	1.54787	supercont2.1,+:865510-865539	exon3
								ANP01938	RVVDPQVYDDMCLLR	C12(Carboxymethyl)	0.00146473	2	940.459	2	940.459	28.76	3.11143	3.88542	3.88542	supercont2.1,+:865573-865691	exon3-4
								ANP01939	RVVDPQVYDDMCLLREK	C12(Carboxymethyl)	3.55e-07	3	713.022	3	713.022	23.77	4.00039	5.11273	5.11273	supercont2.1,+:865573-865697	exon3-4
								ANP01940	VVDPQVYDDMCLLR	C11(Carboxymethyl)	4.23e-16	2	862.408	2	862.408	42.15	2.49835	3.46668	3.46668	supercont2.1,+:865576-865691	exon3-4
								ANP01941	NFTPVGNVDDITPGTYYLTK		2.83e-16	2	1108.05	2	1108.05	90.63	4.02514	0.348378	-0.984752	supercont2.1,+:865713-865772	exon4
TERG_00341T0	523	57.7	6	Trichophyton_rubrum_CBS_118892_NAD_binding_Rossmann_fold_oxidoreductase_(524_aa)	1	0.0249	supercont2.1,+:871253-872856	ANP01943	NLLDILAQDYDVK		3.46e-07	2	760.402	2	760.402	45.02	3.44314	-1.84988	-1.84988	supercont2.1,+:872227-872265	exon2
TERG_00342T0	555	60.3	6.28	Trichophyton_rubrum_CBS_118892_phosphoglucomutase_(556_aa)	32	0.773	supercont2.1,-:873190-875031	ANP01946	DNVALAVK		0.000636111	1	829.48	1	829.48	37.43	1.81252	2.26135	2.26135	supercont2.1,-:873244-873267	exon3
								ANP01947	DAQDYLKDNVALAVK		0.000189289	2	831.936	2	831.936	45.9	3.01189	-2.52469	-2.52469	supercont2.1,-:873244-873288	exon3
								ANP01949	LSGTGSSGATIR		2.8e-12	2	553.794	2	553.794	86.42	3.85642	0.265159	0.938174	supercont2.1,-:873334-873369	exon3
								ANP01950	NQGLFVTFDDGSR		1.93e-13	2	728.347	2	728.347	54.4	3.71627	0.747232	0.0679363	supercont2.1,-:873382-873420	exon3
								ANP01951	VSGGGNFCYTDLDGSVSK	C8(Carboxymethyl)	3.17e-16	2	932.404	2	932.404	93.44	4.09677	-2.82384	-2.82384	supercont2.1,-:873421-873474	exon3
								ANP01952	KVSGGGNFCYTDLDGSVSK	C9(Carboxymethyl)	2.01e-13	2	996.453	2	996.453	106.62	4.75876	-1.48787	-1.48787	supercont2.1,-:873421-873477	exon3
								ANP01953	DTFVGSTISGR		2.39e-10	2	570.289	2	570.289	76.6	2.93164	1.37789	1.37789	supercont2.1,-:873478-873510	exon3
								ANP01954	VIDDLAELVNQK		9.42e-14	2	678.873	2	678.873	36.73	2.61885	1.91108	1.91108	supercont2.1,-:873511-873546	exon3
								ANP01955	KVIDDLAELVNQK		1.77e-09	2	742.919	2	742.919	65.82	3.54306	-1.41782	-1.41782	supercont2.1,-:873511-873549	exon3
								ANP01956	YDYEDVDSNGAK		0.000311836	2	688.287	2	688.287	45.07	2.53015	1.07591	1.07591	supercont2.1,-:873550-873585	exon3
								ANP01957	SHPDKPLSIAAIQQDFWSIYGR		3.82e-16	3	843.77	3	843.77	59.55	3.4815	2.24615	2.24615	supercont2.1,-:873601-873666	exon3
								ANP01958	EKDGLWAIVAWLNIIAGYAK		9.58e-07	3	744.414	3	744.414	58.63	4.27498	2.52463	2.52463	supercont2.1,-:873667-873726	exon3
								ANP01959	MSICGEESFGTGSNHIR	C4(Carboxymethyl)	3.17e-16	2	941.905	2	941.905	124.86	4.27002	-1.79879	-1.25835	supercont2.1,-:873727-873777	exon3
								ANP01960	FFCALFDNKK	C3(Carboxymethyl)	0.00884515	3	430.877	3	430.877	18.04	1.27427	-1.50942	-1.50942	supercont2.1,-:873778-873807	exon3
								ANP01961	FFCALFDNK	C3(Carboxymethyl)	6.79e-07	2	581.765	2	581.765	59.24	3.06523	-0.411708	-0.411708	supercont2.1,-:873781-873807	exon3
								ANP01962	AQNLQCYEVPTGWK	C6(Carboxymethyl)	4.27e-10	2	847.894	2	847.894	75.56	3.51022	-1.80422	-1.80422	supercont2.1,-:873808-873849	exon3
								ANP01963	SMPTSGAVDR		0.00636119	2	510.743	2	510.743	25.15	1.10349	0.752384	0.752384	supercont2.1,-:873859-873888	exon3
								ANP01964	QGVYGLAR		0.00235114	2	432.241	2	432.241	32.28	1.79873	0.535161	0.535161	supercont2.1,-:873889-873912	exon3
								ANP01965	NMIYGANAFVSPGDSLAIIAHHAK		1.64e-10	2	1249.13	2	1249.13	114.59	4.82183	-1.70527	-1.70527	supercont2.1,-:873934-874005	exon3
								ANP01966	DGIQFGAASDGDGDR		2.86e-11	2	740.819	2	740.819	81.28	3.4231	0.215599	0.215599	supercont2.1,-:874006-874050	exon3
								ANP01967	SLVDAVDKDGIQFGAASDGDGDR		2.59e-11	3	770.026	3	770.026	91.64	4.32433	-2.62422	-2.62422	supercont2.1,-:874006-874074	exon3
								ANP01968	ELGLPTSSTQNCVPSPDFNGGHPDPNLTYAK	C12(Carboxymethyl)	3.82e-16	3	1105.52	3	1105.52	60.49	3.69934	3.97329	3.97329	supercont2.1,-:874075-874167	exon3
								ANP01969	VLFDGLHGVTGPYGVAIFQK		3.57e-16	3	706.717	3	706.717	72.53	5.80671	-0.925744	-0.925744	supercont2.1,-:874168-874227	exon3
								ANP01970	DIFDFDLIK		4.3498e-05	2	563.295	2	563.295	44.84	2.04279	-0.240398	-0.130176	supercont2.1,-:874258-874284	exon3
								ANP01971	LSEIGIQQYGSLEVEIIDSTADYVEMLK		1.03e-05	3	1048.53	3	1048.53	38.67	3.44	-2.39474	-2.39474	supercont2.1,-:874285-874368	exon3
								ANP01974	YNLSNGAPAPESVTNK		8.87e-10	2	831.41	2	831.41	57.5	2.66042	-0.498779	-0.498779	supercont2.1,-:874429-874476	exon3
								ANP01975	QATGGILLTASHNPGGPNADFGIK		4.11e-13	2	1168.6	2	1168.6	82.13	3.94681	-1.76443	-1.76443	supercont2.1,-:874477-874626	exon2-3
								ANP01976	LLIGQNGILSTPAASHVIR		2.83e-16	2	980.568	2	980.568	101.63	5.19179	-2.36361	-2.36361	supercont2.1,-:874633-874689	exon2
								ANP01977	IGAAYGVK		0.00520201	2	389.727	2	389.727	30.14	2.42864	1.26661	1.58785	supercont2.1,-:874693-874716	exon2
								ANP01978	FYNTEAIQLIAR		1.9e-09	2	719.887	2	719.887	69.6	3.38402	-1.78516	-1.78516	supercont2.1,-:874717-874752	exon2
								ANP01981	KVTTFQQK		0.00107337	2	490.284	2	490.284	40.65	2.05508	2.76728	2.76728	supercont2.1,-:874843-874866	exon2
								ANP01982	TVDITPFPDQK		0.00412798	2	630.828	2	630.828	25.22	2.46694	0.229515	1.31024	supercont2.1,-:874987-875019	exon1
TERG_00343T0	188	21.2	5.58	Trichophyton_rubrum_CBS_118892_RNA_exonuclease_Rex2_(189_aa)	4	0.3245	supercont2.1,-:875401-876045	ANP01983	EDILESIEEMK		6.98e-05	2	668.318	2	668.318	30.17	2.04764	-4.42127	-4.42127	supercont2.1,-:875431-875463	exon2
								ANP01984	AFLAKPPYAQVLDWLHYR		0.000437295	3	730.06	3	730.06	12.47	3.54714	-2.65231	-2.65231	supercont2.1,-:875563-875616	exon2
								ANP01985	TALLAGNSVHADR		4.65e-05	2	662.854	2	662.854	45.84	2.55787	2.68939	2.68939	supercont2.1,-:875617-875655	exon2
								ANP01986	SGLTAAVLLSPTTAEEAAR		4.14e-07	2	929.497	2	929.497	40.88	3.37857	-3.17573	-3.17573	supercont2.1,-:875698-875754	exon2
TERG_00346T0	631	68.6	5.58	Trichophyton_rubrum_CBS_118892_hypothetical_protein_(632_aa)	3	0.084	supercont2.1,-:881496-883580	ANP01988	NEDAANAAADESMDLDDK		8.34e-08	2	947.883	2	947.883	47.68	3.52417	-1.57764	-1.57764	supercont2.1,-:882912-882965	exon1
								ANP01989	WVGVPQSEGGGLAER		1.9e-07	2	771.388	2	771.388	40.31	2.73517	-1.34346	-1.34346	supercont2.1,-:883104-883148	exon1
								ANP01990	GLAVSIHTPNGPLAEYSVQR		1.26e-05	2	1055.06	2	1055.06	40.31	2.7708	1.92657	1.92657	supercont2.1,-:883506-883565	exon1
TERG_00348T0	663	73.9	6.43	Trichophyton_rubrum_CBS_118892_galactose-proton_symporter_(664_aa)	7	0.187	supercont2.1,-:885143-887766	ANP01991	HAELEPLYK		0.00101442	2	550.294	2	550.294	35.26	2.55445	2.27946	2.27946	supercont2.1,-:885230-885256	exon9
								ANP01993	TLEELDYIFAVPTTTHMHYQVFK	M17(Oxidation)	5.92e-10	3	933.795	3	933.795	71.82	3.628	-0.223931	-0.223931	supercont2.1,-:885299-885367	exon9
								ANP01994	FFQLFTIPR		8.14e-12	2	584.832	2	584.832	34.09	2.83408	4.15832	4.15832	supercont2.1,-:886181-886207	exon6
								ANP01995	ASTVPIFCAENTPAIVR	C8(Carboxymethyl)	4.55e-14	2	923.975	2	923.975	69.28	2.7965	3.63307	3.63307	supercont2.1,-:886595-886645	exon5
								ANP01996	DPANFETVEGLTDDER		5.25e-12	2	904.401	2	904.401	77.67	2.70596	-1.85705	-1.85705	supercont2.1,-:887281-887328	exon2
								ANP01997	YGIEDALPLLR		2.17e-07	2	630.352	2	630.352	40.91	2.64999	-1.73807	-1.73807	supercont2.1,-:887350-887382	exon2
								ANP01998	GNEPATDTQQPTSTQETAAPQPETQQVSPQTQTAHVEPK		9.23e-13	3	1386.65	3	1386.65	86.49	3.03073	-0.646888	-0.646888	supercont2.1,-:887632-887748	exon1
TERG_00352T0	447	49.8	4.96	Trichophyton_rubrum_CBS_118892_protein-tyrosine_phosphatase_(448_aa)	3	0.0828	supercont2.1,+:902486-903957	ANP02002	AAGALSQDPAHK		0.00151038	2	583.302	2	583.302	25.43	1.58665	0.358979	0.358979	supercont2.1,+:902749-902784	exon2
								ANP02003	DALLNLMTATAEK		1.73e-07	2	695.866	2	695.866	66.82	2.8137	0.130989	0.130989	supercont2.1,+:903391-903429	exon3
								ANP02004	TGTFIALDHLLR		0.000215333	3	452.926	3	452.926	26.58	1.95947	0.517275	0.517275	supercont2.1,+:903484-903519	exon3
TERG_00353T0	226	24.4	4.81	Trichophyton_rubrum_CBS_118892_VanZ_domain-containing_protein_(227_aa)	1	0.0664	supercont2.1,-:904863-905633	ANP02005	EGEAPAPSPLQINDK		9.44e-05	2	783.395	2	783.395	10.89	2.60732	1.27868	1.27868	supercont2.1,-:905400-905444	exon2
TERG_00355T0	569	63.1	6.55	Trichophyton_rubrum_CBS_118892_pyruvate_decarboxylase_(570_aa)	2	0.058	supercont2.1,-:910719-912699	ANP02010	LQIVELLTPQEDAPSTLR		8.23e-10	2	1012.05	2	1012.05	56.09	3.47677	-4.01145	-4.01145	supercont2.1,-:910755-910884	exon4-5
								ANP02012	ELEEPIDVAEYLFQR		2.71e-06	2	925.959	2	925.959	74.13	3.03178	-3.98971	-3.98971	supercont2.1,-:912631-912675	exon1
TERG_00356T0	293	32.6	7.4	Trichophyton_rubrum_CBS_118892_hypothetical_protein_(294_aa)	2	0.0887	supercont2.1,+:913051-914355	ANP02013	ILGGGLEELAR		3.54e-06	2	564.324	2	564.324	39.41	2.42092	-1.1706	-1.1706	supercont2.1,+:913840-913872	exon4
								ANP02014	LIASIVGGEHSVDLK		3.59e-07	2	769.432	2	769.432	47.32	3.17027	-1.24766	-1.24766	supercont2.1,+:914047-914091	exon5
TERG_00357T0	1006	108.6	7.11	Trichophyton_rubrum_CBS_118892_SNARE-dependent_exocytosis_protein_(1007_aa)	10	0.1968	supercont2.1,+:917543-920976	ANP02015	FLPILSLAFHPK		2.05e-07	2	691.913	2	691.913	73.44	3.36138	-0.197695	-0.197695	supercont2.1,+:918215-918250	exon3
								ANP02017	ENPDDTGLLIAGGTPTTEMTK		3.67e-14			2	1081.03		4.14086		5.00472	supercont2.1,+:918629-918691	exon3
								ANP02018	QSTLSTPPNAEVAQFCLIPR	C16(Carboxymethyl)	1.86e-07	2	1115.56	2	1115.56	46.97	2.67315	-0.728725	-0.728725	supercont2.1,+:918782-918841	exon3
								ANP02019	AQGPPLLIGGAAAK		0.00317068	2	632.376	2	632.376	10.02	2.43857	1.73162	1.73162	supercont2.1,+:919055-919096	exon3
								ANP02020	LWDIGHDDQIENPTVLQVDLAR		1.72e-09	3	849.766	3	849.766	36.78	3.48257	-4.609	-0.121669	supercont2.1,+:919163-919228	exon3
								ANP02021	DVPLGENNGPDQITSISHR		1.49e-08	2	1025.01	2	1025.01	109.98	3.82461	2.47386	4.63734	supercont2.1,+:919361-919417	exon3
								ANP02022	EGLLPLALLDQSQGSITVLK		2.4e-13	2	1048.1	2	1048.1	102.87	4.33721	-0.600027	-0.600027	supercont2.1,+:919436-919495	exon3
								ANP02023	GVDWPTCAEFGVLR	C7(Carboxymethyl)	6.9e-06	2	804.38	2	804.38	17.43	1.6249	0.575238	0.575238	supercont2.1,+:919655-919696	exon3
								ANP02024	VLSICPINAETGAQTLATQDAVSDLR	C5(Carboxymethyl)	1.6e-06	3	915.46	3	915.46	22.62	2.32231	-4.04708	-4.04708	supercont2.1,+:919898-919975	exon4
								ANP02025	ISPSGDILAWTGPSELAMLHVWGIGSPLLR		8.82e-12	3	1058.56	3	1058.56	66.44	4.98013	-3.95527	-3.95527	supercont2.1,+:920243-920402	exon4-5
TERG_00360T0	315	34.9	9.36	Trichophyton_rubrum_CBS_118892_hypothetical_protein_(316_aa)	11	0.3619	supercont2.1,+:927676-929576	ANP02026	NIYELLGNDPELDPNR		3.48e-05	2	936.456	2	936.456	25.93	2.10002	-5.04855	-5.04855	supercont2.1,+:928035-928218	exon2-3
								ANP02027	NIYELLGNDPELDPNREPEPPVQVVDK		2.48e-08	3	1030.52	3	1030.52	66.57	4.83846	-0.408221	-0.408221	supercont2.1,+:928035-928251	exon2-3
								ANP02029	LPGNEQAFR		0.000810339	2	516.268	2	516.268	56.32	1.75231	2.63269	2.63269	supercont2.1,+:928336-928573	exon3-4
								ANP02030	QVEQGWGSR		0.00754742	2	523.754	2	523.754	22.81	1.63591	-0.51479	-0.51479	supercont2.1,+:928829-928855	exon5
								ANP02031	AGEDIAR		0.00630574	2	366.188	2	366.188	51.73	1.90934	0.573284	0.573284	supercont2.1,+:928886-928906	exon5
								ANP02032	EAAEANAEEPVEEPEDK		6.31e-12	2	928.904	2	928.904	71	4.00058	-0.896219	-0.896219	supercont2.1,+:928919-928969	exon5
								ANP02033	SYADYLAEQAQAK		4.23e-16	2	729.352	2	729.352	70.45	3.62774	4.31072	4.31072	supercont2.1,+:928976-929014	exon5
								ANP02034	RDDEEDEYIK		0.0033587	2	656.289	2	656.289	45.23	2.95006	1.15002	1.15002	supercont2.1,+:929099-929128	exon5
								ANP02035	DDEEDEYIK		0.000134115	1	1155.47	1	1155.47	50.44	2.36874	-0.0890696	-0.0890696	supercont2.1,+:929102-929128	exon5
								ANP02036	NILEVDMR		0.000258729	2	495.26	2	495.26	33.34	2.0886	4.99569	4.99569	supercont2.1,+:929174-929197	exon5
								ANP02037	GGPSHATGPTVDEK		2.55e-07	2	676.826	2	676.826	46.86	2.7111	0.503372	0.503372	supercont2.1,+:929342-929383	exon5
TERG_00362T0	872	98.3	5.12	Trichophyton_rubrum_CBS_118892_glutaminase_(873_aa)	7	0.1204	supercont2.1,-:932389-935216	ANP02039	SDWEFFSMAVSSPSVR		0.000121308	2	916.418	2	916.418	26.67	2.58145	-1.5998	-1.5998	supercont2.1,-:932794-932841	exon5
								ANP02040	LDSVWGVGPDATNLAR		8.2e-08	2	835.927	2	835.927	36.39	3.77539	-1.9772	-1.6818	supercont2.1,-:933486-933533	exon3
								ANP02041	DAEPDVVGLFPLR		0.00138807	2	714.382	2	714.382	30.52	2.45779	1.89507	3.28053	supercont2.1,-:933564-933602	exon3
								ANP02042	QVLGATSFSGTSDNPLLFLK		5.09e-08	2	1048.05	2	1048.05	64.17	4.56249	-2.52076	-2.52076	supercont2.1,-:933936-933995	exon3
								ANP02043	SLLNFHYFDLDK		8.03e-06	3	504.589	3	504.589	19.71	1.80099	-0.910884	-0.910884	supercont2.1,-:934095-934130	exon3
								ANP02044	ITITFLSPITPTSTLR		1.93e-05	2	881.012	2	881.012	41.35	1.87985	1.08669	1.08669	supercont2.1,-:934733-934780	exon2
								ANP02045	NPYLSTWLADAR		0.000969527	2	703.854	2	703.854	24.17	1.92511	-3.60042	-3.60042	supercont2.1,-:935085-935120	exon1
TERG_00363T0	708	80.4	6.62	Trichophyton_rubrum_CBS_118892_glutamyl-tRNA_synthetase_(709_aa)	37	0.6412	supercont2.1,-:936109-938304	ANP02046	DGQPAILFNIPTGK		2.09e-07	2	735.9	2	735.9	50.36	2.092	-1.57419	-1.57419	supercont2.1,-:936115-936156	exon2
								ANP02048	KGESMQFER		0.00186517	2	556.265	2	556.265	35.68	1.47823	2.50949	2.50949	supercont2.1,-:936190-936216	exon2
								ANP02049	HTILADCNLVNLK	C7(Carboxymethyl)	3.91e-16	3	504.602	3	504.602	57.34	4.42659	1.82763	2.65656	supercont2.1,-:936217-936255	exon2
								ANP02050	DEDFEQFLNPK		1.08e-05	2	691.315	2	691.315	39.82	2.14293	-2.58049	-2.58049	supercont2.1,-:936268-936300	exon2
								ANP02051	DKIEKDEDFEQFLNPK		1.52e-06	3	665.661	3	665.661	81.64	4.72861	-1.06601	-1.01107	supercont2.1,-:936268-936315	exon2
								ANP02052	LVPAEIYEFDYLITK		4.18e-10	3	605.325	3	605.325	54.7	3.08102	1.6438	1.6438	supercont2.1,-:936316-936360	exon2
								ANP02053	VTGLDLELHLAGDFK		1.99e-09	2	814.442	2	814.442	70.62	3.83057	4.76723	4.76723	supercont2.1,-:936403-936447	exon2
								ANP02054	QDEEITLMNWGNAIVR		1e-09	2	944.967	2	944.967	86.75	4.74676	1.90125	2.48839	supercont2.1,-:936478-936525	exon2
								ANP02055	SFKQDEEITLMNWGNAIVR		3.33e-05	3	751.046	3	751.046	24.14	2.93501	3.01414	3.01414	supercont2.1,-:936478-936534	exon2
								ANP02056	DILFEQEDAK		0.0017727	2	604.297	2	604.297	26.57	1.81248	2.1408	2.1408	supercont2.1,-:936535-936564	exon2
								ANP02057	HTGIDQEDMVPGTVSGATDADLKPQEKPK		3.03e-16	3	1022.17	3	1022.17	85.32	5.56166	-1.5551	-1.5551	supercont2.1,-:936613-936699	exon2
								ANP02058	YIDPTSPR		0.00819773	2	474.743	2	474.743	24.6	1.27088	0.865889	0.865889	supercont2.1,-:936700-936723	exon2
								ANP02059	NIINMDWTTFWSNNR		1.23e-12	2	956.441	2	956.441	97.67	3.97476	-3.18867	-3.18867	supercont2.1,-:936727-936771	exon2
								ANP02062	IVDQGMVWGWDDPR		4.23e-16	2	837.391	2	837.391	37.14	2.77292	0.924623	0.924623	supercont2.1,-:936856-936897	exon2
								ANP02063	SVHIWDFSR		1.38e-05	3	382.862	3	382.862	33.13	3.01945	-2.39426	-2.39426	supercont2.1,-:936943-936969	exon2
								ANP02064	NPQYAWFQK		0.000222588	2	591.291	2	591.291	42.13	2.27389	1.51107	1.51107	supercont2.1,-:936985-937011	exon2
								ANP02065	TNEYNDRNPQYAWFQK		0.000301671	3	691.983	3	691.983	19.36	1.52217	-3.77074	-3.77074	supercont2.1,-:936985-937032	exon2
								ANP02066	IYPTYDFCVPILDSLEGVTHALR	C8(Carboxymethyl)	2.24e-11	2	1340.67	2	1340.67	56.13	3.32273	-1.78016	-1.78016	supercont2.1,-:937033-937101	exon2
								ANP02069	ISVDDTNK		0.000120903	1	891.443	1	891.443	51.58	1.74006	1.1796	1.1796	supercont2.1,-:937171-937194	exon2
								ANP02070	RDESVEDNLAR		0.0010519	2	652.317	2	652.317	36.29	3.1605	2.7179	2.7179	supercont2.1,-:937252-937284	exon2
								ANP02071	RRDESVEDNLAR		0.000289788	2	730.368	2	730.368	35.58	3.32175	2.89972	2.89972	supercont2.1,-:937252-937287	exon2
								ANP02073	SGNAYADDTEKEQMQHER		3.34e-05	3	703.636	3	703.636	31.03	1.85973	-0.572901	-0.572901	supercont2.1,-:937309-937362	exon2
								ANP02074	SGNAYADDTEK		0.00776879	2	585.75	2	585.75	25.55	1.64057	1.30008	1.30008	supercont2.1,-:937330-937362	exon2
								ANP02075	ISFSSDYFQEMYEDCIK	C15(Carboxymethyl)	1.91e-09	2	1081.95	2	1081.95	78.41	4.06941	1.86549	1.86549	supercont2.1,-:937372-937422	exon2
								ANP02076	FDDTNPSNESQEFVDAITYDLSLLGIFPDR		1.02e-09	3	1140.2	3	1140.2	46.6	3.93365	-1.50551	-1.50551	supercont2.1,-:937423-937512	exon2
								ANP02077	AALLNDYFAHEAYK		4.8e-11	2	813.399	2	813.399	65.44	3.8926	-3.30014	-3.30014	supercont2.1,-:937531-937572	exon2
								ANP02078	AAASAAGASYNIGLPDTDKGVVTR		4.06e-11	2	1153.09	2	1153.09	104.12	5.07539	-2.18294	-2.18294	supercont2.1,-:937618-937689	exon2
								ANP02079	AAASAAGASYNIGLPDTDK		3.91e-16	2	896.943	2	896.943	111.41	3.6836	3.70912	3.70912	supercont2.1,-:937633-937689	exon2
								ANP02080	KAAASAAGASYNIGLPDTDK		1.36e-05	3	640.994	3	640.994	24.66	2.57675	0.85502	0.85502	supercont2.1,-:937633-937692	exon2
								ANP02081	WFNFIETMYPWIGQGAAEMAAGAMK		5.2e-06	3	940.769	3	940.769	36.79	4.89285	-2.60775	-2.60775	supercont2.1,-:937696-937770	exon2
								ANP02082	ELESHLILR		0.000141712	2	555.321	2	555.321	35.71	2.12931	3.92752	3.92752	supercont2.1,-:937885-937911	exon2
								ANP02083	ALEFTKPDFK		9.73e-05	3	399.217	3	399.217	27.16	2.0873	0.877414	0.877414	supercont2.1,-:937933-937962	exon2
								ANP02084	DKYEVLQAGNKEQVDEWLK		0.00015924	3	764.72	3	764.72	37.03	2.93025	-2.12923	-2.12923	supercont2.1,-:937966-938091	exon1-2
								ANP02085	DKYEVLQAGNK		0.000186766	3	422.223	3	422.223	38.83	2.79954	0.982979	0.580457	supercont2.1,-:938059-938091	exon1
								ANP02086	AGLSIVYEESEK		7.86e-08	2	662.834	2	662.834	64.16	3.15274	-1.87458	-1.87458	supercont2.1,-:938176-938211	exon1
								ANP02087	APGETILPAVAVASCLIAANPK	C15(Carboxymethyl)	3.78e-15	2	1082.59	2	1082.59	98.13	5.58815	-0.155102	-0.155102	supercont2.1,-:938212-938277	exon1
								ANP02088	SVLTVALK	N-Term(Acetyl)	3.1e-05	2	436.776			50.36		-1.0937		supercont2.1,-:938278-938301	exon1
TERG_00367T0	528	57.5	9.66	Trichophyton_rubrum_CBS_118892_ATP-dependent_RNA_helicase_DBP8_(529_aa)	1	0.0189	supercont2.1,-:943663-945307	ANP02091	LLVATDVAAR		3.93e-06	2	514.808	2	514.808	36.83	2.52388	-0.261863	-0.261863	supercont2.1,-:944005-944034	exon2
TERG_00369T0	567	62	8.56	Trichophyton_rubrum_CBS_118892_zinc_knuckle_transcription_factor/splicing_factor_MSL5/ZFM1_(568_aa)	7	0.1799	supercont2.1,-:948319-950687	ANP02093	IEGGPGGYGQGNNYGGDDVKPWQQR		4.58e-10	3	883.738	3	883.738	57.02	3.70322	2.02395	-3.61162	supercont2.1,-:948823-948897	exon7
								ANP02094	ELAALNGTLR		0.000172705	2	529.304	2	529.304	22.86	2.03703	1.10899	1.10899	supercont2.1,-:949317-949346	exon5
								ANP02095	ELIHNVIETAASIPEGQNELKR		6.63e-07	3	821.104	3	821.104	35.5	2.49057	-2.48961	-2.48961	supercont2.1,-:949359-949499	exon4-5
								ANP02096	ELIHNVIETAASIPEGQNELK		2.94e-07	2	1153.11	2	1153.11	36.44	3.1327	0.38118	0.38118	supercont2.1,-:949362-949499	exon4-5
								ANP02097	VYVPVNDYPEINFIGLLIGPR		9.5e-10	3	796.77	3	796.77	54.09	4.01775	-0.872059	-0.872059	supercont2.1,-:949674-950012	exon3-4
								ANP02098	SPSPAPQYDNLGK		0.000262853	2	687.339	2	687.339	21.92	1.48551	0.436955	0.436955	supercont2.1,-:950151-950189	exon3
								ANP02099	INDVVPADGDR		0.000671224	2	585.791	2	585.791	33.65	2.28746	-0.434614	-0.434614	supercont2.1,-:950258-950290	exon2
TERG_00370T0	277	31.4	8.84	Trichophyton_rubrum_CBS_118892_glutathione_S-transferase_(278_aa)	8	0.3574	supercont2.1,-:951071-952049	ANP02102	EAYEVSNWLFFQNAGVGPMQGQANHFNR		4.87e-13	3	1071.16	3	1071.16	98.44	4.88925	-0.181497	-0.181497	supercont2.1,-:951446-951607	exon2-3
								ANP02103	IAIFESGSILEYLVDRYDTEHK		4.54e-08	4	650.332	4	650.332	31.91	2.46908	-0.648462	-0.648462	supercont2.1,-:951632-951697	exon2
								ANP02104	IAIFESGSILEYLVDR		1.11e-12	2	912.991	2	912.991	130.76	5.89608	0.078311	0.618648	supercont2.1,-:951650-951697	exon2
								ANP02106	IPAITDTFTDGK		7.98e-07	2	639.831	2	639.831	45.87	3.69476	-2.73603	-2.73603	supercont2.1,-:951701-951736	exon2
								ANP02107	EPWFLEINPNGR		3.81e-06	2	736.369	2	736.369	51.06	3.55637	-2.15133	-2.15133	supercont2.1,-:951737-951772	exon2
								ANP02108	VVAIELGQNTQKEPWFLEINPNGR		0.000480174	3	918.151	3	918.151	18.61	3.31159	-1.29963	-1.29963	supercont2.1,-:951737-951808	exon2
								ANP02109	VVAIELGQNTQK		5.14e-10	2	650.366	2	650.366	64.09	3.48389	-1.34852	-1.15801	supercont2.1,-:951773-951808	exon2
								ANP02110	ISIALEELGLPYK		2.41e-09	2	723.415	2	723.415	66.42	2.62231	-1.16213	-1.33311	supercont2.1,-:951809-951914	exon1-2
TERG_00373T0	1251	139.2	6.23	Trichophyton_rubrum_CBS_118892_hypothetical_protein_(1252_aa)	66	0.733	supercont2.1,-:961639-965672	ANP02114	FIEGGDAAR		0.000141553	2	468.233	2	468.233	46.73	1.59332	1.12728	1.12728	supercont2.1,-:961711-961737	exon4
								ANP02116	SSLTAQAQPSVGQTTSEMVAGVDGANPSLDSR		2.94e-11	3	1054.5	3	1054.5	54.39	4.09293	-2.48434	-2.48434	supercont2.1,-:961759-961854	exon4
								ANP02119	EAESWLEQLTQNAVSIAK		1.99e-13	2	1009.02	2	1009.02	118.81	5.19412	4.62942	4.62942	supercont2.1,-:961909-961962	exon4
								ANP02120	EAYNIFLNELGPEDR		2.3e-10	2	890.428	2	890.428	79.37	3.26717	-3.3113	-3.3113	supercont2.1,-:961972-962016	exon4
								ANP02121	QSVNTATLLFQLAQALALDQDSK		3.46e-17	2	1238.16	2	1238.16	101.38	6.50037	-0.147427	0.727168	supercont2.1,-:962038-962106	exon4
								ANP02122	WFESSLAVCDELFGR	C9(Carboxymethyl)	1.38e-11	2	908.91	2	908.91	83.79	4.36018	-3.81936	-4.5205	supercont2.1,-:962107-962151	exon4
								ANP02123	IVYGPSHPDSITTMNNAAVMLQHLK		4.23e-16	3	913.133	3	913.133	37.38	4.63915	1.37962	1.37962	supercont2.1,-:962173-962247	exon4
								ANP02126	KAVIVTER		0.00375846	2	458.286	2	458.286	45.69	2.66852	2.31437	2.31437	supercont2.1,-:962371-962394	exon4
								ANP02127	DAAVELAR		0.000229266	2	422.731	2	422.731	30.62	1.68607	2.01677	2.01677	supercont2.1,-:962395-962418	exon4
								ANP02128	LYHQLSMVYYQTDEKDAAVELAR		3.49e-09	3	915.122	3	915.122	63.41	4.84889	4.66176	4.66176	supercont2.1,-:962395-962463	exon4
								ANP02129	LYHQLSMVYYQTDEK		3.44e-10	2	959.456	2	959.456	55.33	3.51003	-0.0444184	-0.0444184	supercont2.1,-:962419-962463	exon4
								ANP02130	ELGQELILESLSLHEQIYGILHPEVAK		9.53e-14	3	1020.22	3	1020.22	66.38	3.55107	-0.64904	-0.64904	supercont2.1,-:962464-962544	exon4
								ANP02131	ISLMQNQK		0.00057667	2	481.26	2	481.26	34.18	2.13497	-0.0370361	-0.0370361	supercont2.1,-:962545-962568	exon4
								ANP02132	SALAEEAFEAGR		3.03e-10	2	625.803	2	625.803	73.29	2.78219	-1.87183	-1.87183	supercont2.1,-:962569-962604	exon4
								ANP02133	GSSAAAATPAPAPALTFVPDDIVNIVPIVK		4.3e-11	2	1451.8	2	1451.8	54.42	2.89105	1.51447	1.51447	supercont2.1,-:962620-962709	exon4
								ANP02134	KGSSAAAATPAPAPALTFVPDDIVNIVPIVK		8.52e-10	3	1010.9	3	1010.9	79.92	4.56181	-2.74634	-2.74634	supercont2.1,-:962620-962712	exon4
								ANP02135	KKGSSAAAATPAPAPALTFVPDDIVNIVPIVK		0.000744443	3	1053.6	3	1053.6	36.16	4.24202	4.28147	4.28147	supercont2.1,-:962620-962715	exon4
								ANP02136	EQSPAENGAHSDSQDEK		1.21e-07	2	914.884	2	914.884	68.31	3.0456	4.32737	4.32737	supercont2.1,-:962728-962778	exon4
								ANP02138	LGLQLVAK		2.11e-06	2	421.279	2	421.279	55.4	2.95583	-0.773778	-0.773778	supercont2.1,-:962809-962832	exon4
								ANP02140	YTLEASWTGSLK		4.91e-08	2	678.344	2	678.344	72.96	3.16528	-3.33899	-2.88268	supercont2.1,-:962866-962901	exon4
								ANP02141	AIYPEGDFSFEEVTPASLAADIEK		2.92e-16	2	1300.13	2	1300.13	84.74	5.17703	4.36249	4.36249	supercont2.1,-:962923-962994	exon4
								ANP02142	AEIDESLR		0.000339729	2	466.736	2	466.736	29.65	1.68729	-3.23899	-3.23899	supercont2.1,-:962995-963018	exon4
								ANP02143	NLPPPFATACIAHLLNCLLGTEVNSKPR	C10(Carboxymethyl); C17(Carboxymethyl)	6.66e-06	3	1035.87	3	1035.87	16.85	1.14106	4.85412	4.85412	supercont2.1,-:963019-963102	exon4
								ANP02144	LQSLVALVVQDMVAR	M12(Oxidation)	4.23e-16	2	829.473	2	829.473	84.63	3.4529	4.85072	4.85072	supercont2.1,-:963136-963180	exon4
								ANP02145	VAELAQEK		0.000119799	1	887.486	1	887.486	48.95	2.07754	2.68754	2.68754	supercont2.1,-:963190-963213	exon4
								ANP02147	DLYNGEVGFPMDGQSLGQLLHK	M11(Oxidation)	4.23e-16	2	1217.59	2	1217.59	66.06	4.63645	4.51591	4.51591	supercont2.1,-:963244-963309	exon4
								ANP02148	LALNPDVFSGQVPQTEEEKEEWARDEK		0.00115151	3	1048.85	3	1048.85	24.29	2.74994	4.25739	4.25739	supercont2.1,-:963367-963447	exon4
								ANP02149	LALNPDVFSGQVPQTEEEKEEWAR		4.23e-16	2	1386.68	2	1386.68	89.83	3.24419	4.27272	4.27272	supercont2.1,-:963376-963447	exon4
								ANP02150	LALNPDVFSGQVPQTEEEK		2.36e-13	2	1051.02	2	1051.02	76.06	4.73987	-1.48593	-1.48593	supercont2.1,-:963391-963447	exon4
								ANP02151	VDISNFR		0.00709827	2	425.725	2	425.725	27.57	1.79007	2.24735	2.24735	supercont2.1,-:963448-963468	exon4
								ANP02152	MGQYVKEEVEKR		7.58e-05	3	499.259	3	499.259	26.99	2.52444	3.72283	3.72283	supercont2.1,-:963553-963588	exon4
								ANP02153	MGQYVKEEVEK		0.00243857	2	670.334	2	670.334	20.11	2.60657	3.97676	3.97676	supercont2.1,-:963556-963588	exon4
								ANP02155	HELVEAYWR		2.88e-06	2	601.8	2	601.8	51.96	2.53329	-2.11116	-2.11116	supercont2.1,-:963595-963621	exon4
								ANP02156	ITPLDISWTEDAEGHDEYPHR		1.18e-10	2	1241.07	2	1241.07	80.38	4.33644	-0.263912	0.0333798	supercont2.1,-:963637-963699	exon4
								ANP02157	YVLDLYR		3.97e-05	2	471.258	2	471.258	15.65	2.36445	-0.231366	-0.231366	supercont2.1,-:963700-963720	exon4
								ANP02158	KYVLDLYR		0.0026037	2	535.308	2	535.308	37.84	2.47642	3.45464	3.45464	supercont2.1,-:963700-963723	exon4
								ANP02160	HELEGSVETK		5.13e-05	2	564.779	2	564.779	44.57	2.29368	-3.11764	-3.11764	supercont2.1,-:963748-963777	exon4
								ANP02161	HAVWDKDGVR		0.000750615	3	394.872	3	394.872	26.15	1.90966	0.850615	0.850615	supercont2.1,-:963778-963807	exon4
								ANP02163	NEAFTPVFEK		0.000125183	1	1181.58	1	1181.58	44.07	2.03023	0.602895	0.602895	supercont2.1,-:963835-963864	exon4
								ANP02164	HREPGEHQIDYGGVEGKDVVAK		2.7e-07	3	807.405	3	807.405	78.03	5.3275	2.50932	2.50932	supercont2.1,-:963865-963930	exon4
								ANP02166	HREPGEHQIDYGGVEGK		7.4e-08	4	477.73	4	477.73	56	3.17205	-0.573081	-0.573081	supercont2.1,-:963880-963930	exon4
								ANP02167	IVGQSIVPGIFK		4.71e-11	2	629.383	2	629.383	36.46	3.43743	2.4925	2.4925	supercont2.1,-:963931-963966	exon4
								ANP02168	TVNQLDIPGLFTPGTVVVDYLGK		2.98e-16	3	816.113	3	816.113	68.16	4.97441	0.150283	0.150283	supercont2.1,-:963970-964038	exon4
								ANP02170	IAVGKDVMGVK		0.000142306	2	558.828	2	558.828	36.27	2.73922	4.1842	4.1842	supercont2.1,-:964039-964071	exon4
								ANP02171	GEVASLNPMEAR		6.16e-07	2	637.314	2	637.314	52.82	2.57727	-0.0480332	-0.0480332	supercont2.1,-:964168-964203	exon4
								ANP02173	LFADYNDAAVR		2.56e-07	2	627.807	2	627.807	50.45	2.17218	-3.45988	-3.45988	supercont2.1,-:964225-964257	exon4
								ANP02174	DWNEEFQTTR		0.000473252	2	663.292	2	663.292	22.17	1.95678	1.22145	1.22145	supercont2.1,-:964315-964344	exon4
								ANP02175	SQENYLIAGIDNSETLR		8.04e-15	2	961.981	2	961.981	87.85	5.2149	4.35739	4.35739	supercont2.1,-:964345-964395	exon4
								ANP02176	DLLTTFPFQNSIPNNPWLVPASQSQATAHISDATR		1.15e-13	3	1279.97	3	1279.97	109.72	4.60264	-2.61432	-2.61432	supercont2.1,-:964396-964500	exon4
								ANP02177	ALQEYNNK		0.000391353	2	490.246	2	490.246	31.83	2.48453	0.762356	0.69885	supercont2.1,-:964504-964527	exon4
								ANP02178	NYSAHSLLTLISLISPSFNESFK		3.34e-06	3	856.782	3	856.782	33.24	2.74273	-0.791262	-0.791262	supercont2.1,-:964528-964596	exon4
								ANP02179	FDPFPRPAPK		0.00732812	2	586.318	2	586.318	16.66	2.18673	2.84075	2.84075	supercont2.1,-:964597-964626	exon4
								ANP02180	GHLLYLLVTTNEGEQHQITSHVSGFYVNK		5.37e-09	3	1095.56	3	1095.56	55.23	4.26827	3.04907	3.04907	supercont2.1,-:964642-964728	exon4
								ANP02181	SVSLSPWNPPPYHLR		1.93e-15	2	875.46	2	875.46	43.21	2.48846	3.72421	3.72421	supercont2.1,-:964735-964779	exon4
								ANP02182	THALDGYDVNAPLDLATVLPK		3.19e-16	2	1112.08	2	1112.08	101.43	4.91733	0.952495	-2.47879	supercont2.1,-:964810-964872	exon4
								ANP02183	KTHALDGYDVNAPLDLATVLPK		1.26e-09	2	1176.13	2	1176.13	85.03	5.19478	-1.19166	-1.19166	supercont2.1,-:964810-964875	exon4
								ANP02184	VDTLHGLSAGLSLYDSVAAGEGLPEEAK		9.1e-07	3	933.804	3	933.804	42.35	3.78866	-2.17611	-2.17611	supercont2.1,-:964876-964959	exon4
								ANP02185	ELIGAAGNR		9.37e-05	2	450.749	2	450.749	47.47	2.39623	0.810392	0.810392	supercont2.1,-:964960-964986	exon4
								ANP02187	ADSEVVLIEDPYTEK		1.24e-09	2	854.419	2	854.419	51.45	4.18282	-0.557891	-0.557891	supercont2.1,-:965017-965061	exon4
								ANP02188	INDYVELSEVK		6.77e-08	2	654.838	2	654.838	81.43	3.05318	0.881664	0.881664	supercont2.1,-:965071-965103	exon4
								ANP02189	QSIVELPGTFQYTCFHLETEGNR	C14(Carboxymethyl)	4.27e-10	3	909.761	3	909.761	44.53	2.2106	-1.49354	-1.49354	supercont2.1,-:965104-965172	exon4
								ANP02190	LPHEPHSIQVMVSSQEQVQDVR		1.46e-10	3	848.425	3	848.425	70.24	3.90778	-2.83382	-2.83382	supercont2.1,-:965173-965303	exon3-4
								ANP02191	TEGEQDDNNNAGGLFQISVK		8.78e-12	2	1068.49	2	1068.49	88.34	4.13021	-1.91349	-1.91349	supercont2.1,-:965304-965445	exon2-3
								ANP02192	EVLEDTKPENTSQK		1.22e-06	2	809.402	2	809.402	38.74	2.84523	0.2972	0.2972	supercont2.1,-:965464-965636	exon1-2
								ANP02193	GPEHSKEVLEDTKPENTSQK		2.26e-07	3	751.707	3	751.707	39.95	4.57895	2.19289	2.68436	supercont2.1,-:965464-965654	exon1-2
								ANP02194	MDQQSKGPEHSKEVLEDTKPENTSQK	N-Term(Acetyl)	3.62e-06	5	603.293	5	603.293	17.9	1.21764	4.18683	4.78164	supercont2.1,-:965464-965672	exon1-2
TERG_00376T0	560	63.8	5.86	Trichophyton_rubrum_CBS_118892_hypothetical_protein_(561_aa)	8	0.2196	supercont2.1,-:970089-972094	ANP02195	EICSEPGFDQYLEDTLDR	C3(Carboxymethyl)	4.3e-08	2	1094.47	2	1094.47	69.22	3.89709	0.812832	0.812832	supercont2.1,-:970251-970304	exon5
								ANP02196	ADFIQSYDHDNIFTIDSK		2.4e-11	2	1064.99	2	1064.99	75.02	4.30128	-3.71712	-2.7921	supercont2.1,-:970350-970403	exon5
								ANP02197	TYDDENGHILPELPLHK		5.86e-08	3	664.331	3	664.331	23.98	2.34512	-4.87624	-4.87624	supercont2.1,-:970425-970475	exon5
								ANP02198	ENPPQSILEEVYNK		6.76e-07	2	830.413	2	830.413	30.67	2.92378	-1.75023	-1.75023	supercont2.1,-:970772-970813	exon4
								ANP02199	MEVIPIPDLPK		3.95e-06	2	626.353	2	626.353	49.65	2.96666	-2.54951	-2.54951	supercont2.1,-:970862-970894	exon4
								ANP02200	DLLEMLQQR		5.29e-06	2	573.301	2	573.301	50	2.70012	-2.44159	-2.44159	supercont2.1,-:971048-971074	exon3
								ANP02201	NVNQNPLILIINSLHLVR		1.28e-05	3	690.746	3	690.746	26.06	2.20001	1.8409	1.8409	supercont2.1,-:971093-971146	exon3
								ANP02205	MDNAFEPGDPMLELAGVK		7.43e-07	2	967.452	2	967.452	54.39	3.32552	-3.97618	-3.97618	supercont2.1,-:971606-971659	exon2
TERG_00377T0	367	39.6	9.45	Trichophyton_rubrum_CBS_118892_hypothetical_protein_(368_aa)	2	0.0627	supercont2.1,+:974324-975488	ANP02206	VSVEVPIPK		0.000447157	2	484.295	2	484.295	28.68	1.75846	3.74177	3.74177	supercont2.1,+:974408-974434	exon1
								ANP02208	DLLFVTSASQPPEK		2.5e-07	2	766.406	2	766.406	55.27	2.97808	2.75441	2.75441	supercont2.1,+:975129-975170	exon2
TERG_00380T0	962	107.1	6.74	Trichophyton_rubrum_CBS_118892_peptidase_M28_(963_aa)	13	0.2401	supercont2.1,+:979902-982790	ANP02209	ESPAGVDLEEAWHDLQHLTR		1.16e-07	2	1152.06	2	1152.06	69	4.73298	-0.716744	-0.716744	supercont2.1,+:980037-980096	exon1
								ANP02210	QYHPYNSHSNDEVHQWLLK		6.6e-06	3	799.049	3	799.049	25.84	2.41072	4.24966	4.24966	supercont2.1,+:980097-980153	exon1
								ANP02211	GLVLLFNNGEEDFLNGAYAYSQHPMSK		6.28e-05	3	1005.49	3	1005.49	31.63	3.21759	2.64592	2.64592	supercont2.1,+:980517-980597	exon1
								ANP02212	FTHTFLNLEGAGAGGR		1.62e-09	3	549.944	3	549.944	59.25	3.35944	-3.54199	-3.54199	supercont2.1,+:980598-980645	exon1
								ANP02213	SETDYHVFDGVFGMR		9.42e-07	2	880.394	2	880.394	45.01	3.9104	3.60978	3.60978	supercont2.1,+:980757-980801	exon1
								ANP02214	GLDVAFMEPR		0.000892054	2	567.783	2	567.783	21.17	2.10004	-3.13016	-3.13016	supercont2.1,+:980802-980831	exon1
								ANP02216	TPSSDSHFLAPSADELPSSSSAAGR		1.25e-12	3	825.385	3	825.385	78.07	4.45023	-1.14723	-1.14723	supercont2.1,+:981621-981695	exon1
								ANP02217	DFNPEDIEDEEPTESTSLLR		1.37e-11	2	1168.52	2	1168.52	95.62	4.82602	-1.27394	-1.27394	supercont2.1,+:981696-981755	exon1
								ANP02218	GSQESNISNQGNNSLHPK		0.00071707	3	637.638			16.01		2.83979		supercont2.1,+:981798-981851	exon1
								ANP02220	LLFDSPIADFHVQGSVVDK		0.000430014	3	696.365	3	696.365	19.46	1.89217	0.48369	0.48369	supercont2.1,+:982473-982529	exon1
								ANP02221	VMCLWSDDNDLHVIPELDLVR	C3(Carboxymethyl)	1.81e-10	2	1270.61	2	1270.61	73.66	4.06616	-1.28279	-1.28279	supercont2.1,+:982650-982712	exon1
								ANP02222	FAPWWVAITK		5.88e-05	2	609.84	2	609.84	26.6	2.00013	4.05769	4.05769	supercont2.1,+:982716-982745	exon1
								ANP02223	DGLVEGSYSFK		0.000413263	2	601.293	2	601.293	17.33	1.17089	4.90287	4.90287	supercont2.1,+:982752-982784	exon1
TERG_00381T0	585	65.3	7.25	Trichophyton_rubrum_CBS_118892_SCF_E3_ubiquitin_ligase_complex_F-box_protein_grrA_(586_aa)	2	0.0444	supercont2.1,-:983754-985647	ANP02224	LTDASVEQLATLPK		4.23e-16	2	743.414	2	743.414	48.59	3.56821	3.48907	3.48907	supercont2.1,-:984306-984347	exon2
								ANP02227	LPPEILIAIFSK		1.62e-06	2	670.913	2	670.913	48.77	2.35716	0.294932	0.294932	supercont2.1,-:985411-985446	exon1
TERG_00382T0	574	62.9	7.5	Trichophyton_rubrum_CBS_118892_hypothetical_protein_(575_aa)	3	0.1376	supercont2.1,-:986839-988905	ANP02230	VTVAASPPTAHLFEQMTSVNLHPVHVYGLTETYGPITK		0.00027566			5	822.025		3.5161		-1.99765	supercont2.1,-:987548-987661	exon4
								ANP02231	GCYLAALGNIIESGLNFQQGR	C2(Carboxymethyl)	2.73e-12	3	761.379	3	761.379	95.95	3.89328	-0.290019	-0.434411	supercont2.1,-:987979-988041	exon3
								ANP02232	LESVSAQLQPQQGDAASLSR		6.75e-10	2	1043.03	2	1043.03	70.85	4.71321	-2.95479	-2.95479	supercont2.1,-:988825-988884	exon1
TERG_00383T0	229	26.7	10.4	Trichophyton_rubrum_CBS_118892_60S_ribosomal_protein_L13a_(230_aa)	17	0.4629	supercont2.1,-:989649-990723	ANP02233	EQLAQYGY		0.001034	2	486.229	2	486.229	31.44	1.06335	3.31417	3.31417	supercont2.1,-:989652-989675	exon6
								ANP02235	QLLQAQR		0.00137119	2	428.755	2	428.755	47.89	2.48442	2.28807	2.28807	supercont2.1,-:989703-989723	exon6
								ANP02236	RQLLQAQR		0.00149743	2	506.805	2	506.805	22.79	2.8058	0.716072	0.716072	supercont2.1,-:989703-989726	exon6
								ANP02237	GAAYYER		0.00864492	2	415.197	2	415.197	29.59	1.71179	2.69285	2.76812	supercont2.1,-:989742-989762	exon6
								ANP02238	YQDVVAR		0.000758964	2	425.726	2	425.726	40.95	2.29056	2.91984	2.77311	supercont2.1,-:989866-989886	exon5
								ANP02239	LSHEVGWKYQDVVAR		4.08e-07	3	596.312	3	596.312	26.29	2.69892	-2.00353	-2.00353	supercont2.1,-:989866-989910	exon5
								ANP02240	LSHEVGWK		0.00015504	3	319.172	3	319.172	42.02	2.22555	1.48642	1.2441	supercont2.1,-:989887-989910	exon5
								ANP02242	KYCTVGR	C3(Carboxymethyl)	0.00920137	2	442.72	2	442.72	27.34	1.59637	3.85338	3.85338	supercont2.1,-:989911-989931	exon5
								ANP02243	VVVPQALR		0.00013093	2	441.281	2	441.281	24.47	2.01509	-2.2769	-1.28686	supercont2.1,-:989956-989979	exon5
								ANP02244	RVVVPQALR		0.000106696	2	519.334	2	519.334	43.55	3.19536	2.39835	2.39835	supercont2.1,-:989956-989982	exon5
								ANP02245	VFEGIPEPYDKK		2.09e-05	2	711.366	2	711.366	37.32	3.21367	-4.46683	-4.46683	supercont2.1,-:989986-990021	exon5
								ANP02246	LKVFEGIPEPYDKK		0.000964879	3	554.974	3	554.974	28.91	2.56833	-1.90484	-1.90484	supercont2.1,-:989986-990027	exon5
								ANP02247	VFEGIPEPYDK		3.11e-08	2	647.325	2	647.325	62.34	2.39545	2.70254	4.4625	supercont2.1,-:989989-990021	exon5
								ANP02249	GGPFHFR		0.000487247	2	409.207	2	409.207	29.6	1.66386	-5.0088	-5.0088	supercont2.1,-:990109-990236	exon4-5
								ANP02251	CEALNISGEFFR	C1(Carboxymethyl)	4.23e-16	2	722.335	2	722.335	64.31	3.19247	3.95363	3.95363	supercont2.1,-:990452-990487	exon2
								ANP02252	QLLNGQK		0.00318157	2	400.736	2	400.736	34.34	1.59866	1.87291	1.87291	supercont2.1,-:990503-990523	exon2
								ANP02255	STFEPVVVIDGK	N-Term(Acetyl)	1.56e-08	2	666.858			43.81		3.0784		supercont2.1,-:990563-990720	exon1-2
TERG_00384T0	315	35.3	8.31	Trichophyton_rubrum_CBS_118892_hypothetical_protein_(316_aa)	1	0.0349	supercont2.1,+:991486-992546	ANP02256	LSICGHVHEAR	C4(Carboxymethyl)	0.00561066	2	640.313			27.87		-1.49412		supercont2.1,+:992205-992237	exon2
TERG_00385T0	431	47.3	8.56	Trichophyton_rubrum_CBS_118892_hypothetical_protein_(432_aa)	3	0.116	supercont2.1,-:994423-995858	ANP02258	VTEAHGVIK		0.00191352	2	477.274			20.58		-0.403214		supercont2.1,-:994652-994678	exon2
								ANP02261	HIQDSATSITDNQVILASGEK		6.74e-11	2	1114.06	2	1114.06	61.89	4.27543	-2.76537	-2.76537	supercont2.1,-:995451-995513	exon1
								ANP02262	CGVVSGLEQSAFIPYDGVAR	C1(Carboxymethyl)	5.29e-06	2	1063.52	2	1063.52	34.53	1.87577	3.87281	3.87281	supercont2.1,-:995538-995597	exon1
TERG_00389T0	188	20.3	8.07	Trichophyton_rubrum_CBS_118892_hypothetical_protein_(189_aa)	2	0.1543	supercont2.1,+:1005695-1006261	ANP02265	GAVTVAFSQLPQR		0.000688468	2	687.379	2	687.379	15.62	1.77208	-2.47096	-2.47096	supercont2.1,+:1005845-1005883	exon1
								ANP02266	GFQELPTEFGAFEIEK		1.32e-06	2	921.451	2	921.451	30.68	2.1959	-0.0130576	-0.0130576	supercont2.1,+:1006175-1006222	exon1
TERG_00390T0	833	91.6	7.18	Trichophyton_rubrum_CBS_118892_AP-1_complex_subunit_gamma-1_(834_aa)	21	0.4574	supercont2.1,-:1008576-1011343	ANP02267	LQLSAINKPELDGGEEGTQAMR		2.45e-10	3	786.396	3	786.396	59.89	4.507	-1.77877	-1.77877	supercont2.1,-:1008759-1008824	exon4
								ANP02268	VGLQAAVPK		0.000511786	2	441.775	2	441.775	39.34	2.33747	1.31516	1.31516	supercont2.1,-:1008834-1008860	exon4
								ANP02269	NTSALDSFSK		0.00662364	2	535.262	2	535.262	31.18	1.53606	1.24644	1.24644	supercont2.1,-:1008861-1008890	exon4
								ANP02270	NDLQVTLQVQR		0.000131511	2	657.361	2	657.361	27.8	1.26414	-2.37937	-2.37937	supercont2.1,-:1008930-1008962	exon4
								ANP02271	ASNVNDIMDLFGSNGASQQQATSGLPGRPTPAPAPAAPSPSAHEVFNK		3.13e-12	4	1201.34	4	1201.34	55.07	4.22964	0.904644	0.904644	supercont2.1,-:1008963-1009106	exon4
								ANP02272	QNTADLLADILGGGTSEPAPQPQPTSTK		2.4e-09	2	1404.2	2	1404.2	84.64	4.16692	-4.31696	-4.31696	supercont2.1,-:1009107-1009190	exon4
								ANP02273	KPSKPTEQDMLLDLMGGSEPPTESTSGK		5.01e-06	3	987.483	3	987.483	22.37	3.25523	3.89646	3.89646	supercont2.1,-:1009203-1009286	exon4
								ANP02274	AVEYSNLFGYEQIR		5.59e-16	2	844.921	2	844.921	44.25	2.4822	3.5169	3.5169	supercont2.1,-:1009395-1009436	exon4
								ANP02275	TADLSEEIQQR		2.43e-06	2	645.322	2	645.322	63.14	2.76259	2.29258	2.29258	supercont2.1,-:1009437-1009469	exon4
								ANP02276	ISDPAQIER		0.00438691	2	514.772	2	514.772	28.86	2.08971	-0.477744	-0.477744	supercont2.1,-:1009494-1009520	exon4
								ANP02277	LIATTPDLQTYSVQK		4.23e-16	2	839.46	2	839.46	46.88	3.4888	4.10477	4.10477	supercont2.1,-:1009761-1009805	exon4
								ANP02278	NTILECLRDPDISIR	C6(Carboxymethyl)	9.07e-05	3	605.978	3	605.978	33.43	2.65323	-5.03578	-5.03578	supercont2.1,-:1010049-1010093	exon4
								ANP02280	VVAVEPNAVQR		0.00640215	2	591.336	2	591.336	25.24	2.0309	0.40477	0.40477	supercont2.1,-:1010100-1010132	exon4
								ANP02281	VLGVNILGK		0.00150097	2	456.8	2	456.8	26.79	1.37806	5.00904	5.00904	supercont2.1,-:1010190-1010216	exon4
								ANP02282	GDAATSELINDILAQVATNTESSK		2.66e-14	2	1224.61	2	1224.61	74.08	4.36283	4.26836	4.26836	supercont2.1,-:1010289-1010360	exon4
								ANP02283	GLTSSGYAPEHDVSGITDPFLQVK		4.23e-16	3	840.09	3	840.09	70.34	5.93589	3.17936	3.17936	supercont2.1,-:1010391-1010462	exon4
								ANP02285	KVPDLLEHFVDK		9.97e-12	3	480.603	3	480.603	33.67	2.74122	3.7633	3.7633	supercont2.1,-:1010616-1010651	exon4
								ANP02286	DLFPEIESLISTANPYIR		2.67e-11	2	1039.54	2	1039.54	63.08	3.9888	1.10647	-1.26316	supercont2.1,-:1010688-1010741	exon4
								ANP02287	NDLNHSNQYVVGLALCTLGNIASVEMSR	C16(Carboxymethyl)	0.000274025	3	1026.16	3	1026.16	13.77	3.0284	-1.71117	-1.71117	supercont2.1,-:1010742-1010883	exon3-4
								ANP02288	LGYLGTMLLLDENQEVLTLVTNSLK		6.79e-09	3	926.505	3	926.505	44.62	3.98353	-0.525854	-0.525854	supercont2.1,-:1010884-1010958	exon3
								ANP02289	LLYLFTLGER		4.23e-16	2	612.854	2	612.854	49.06	3.37539	0.94924	0.94924	supercont2.1,-:1011022-1011051	exon3
TERG_00392T0	430	47.5	5.17	Trichophyton_rubrum_CBS_118892_nucleotide-sugar_transporter_(431_aa)	4	0.1488	supercont2.1,-:1014500-1015984	ANP02292	ACLPSLDEETREPLLPEEPIEHI	C2(Carboxymethyl)	2.8e-05	3	896.774	3	896.774	24.05	2.06668	-0.0750874	-0.0750874	supercont2.1,-:1014503-1014571	exon4
								ANP02293	ACLPSLDEETR	C2(Carboxymethyl)	0.0091942	2	646.298	2	646.298	25.61	1.33693	4.94071	4.94071	supercont2.1,-:1014539-1014571	exon4
								ANP02294	LGYFDAVEGWR		2.13e-07	2	656.817	2	656.817	57.21	3.08346	-4.3328	-4.3328	supercont2.1,-:1014896-1014928	exon3
								ANP02295	FSSAAPLFTDGYQSIDTADEADDETGDIHK		6.04e-14	3	1072.81	3	1072.81	58.23	3.64348	-0.977704	-0.977704	supercont2.1,-:1015520-1015609	exon3
TERG_00397T0	774	83.3	9.52	Trichophyton_rubrum_CBS_118892_hypothetical_protein_(775_aa)	1	0.0168	supercont2.1,+:1031860-1034377	ANP02300	RPGTAEGPGAAPR		0.00730915	3	412.886	3	412.886	21.6	3.13859	0.277199	0.277199	supercont2.1,+:1032295-1032333	exon1
TERG_00399T0	336	36.3	4.92	Trichophyton_rubrum_CBS_118892_hypothetical_protein_(337_aa)	2	0.0685	supercont2.1,+:1038311-1039454	ANP02306	AAEAAEAAADGQER		1.2e-06	2	680.313	2	680.313	48.5	2.82253	4.34729	4.34729	supercont2.1,+:1038503-1038544	exon1
								ANP02309	WCIVGLLSR	C2(Carboxymethyl)	6.74e-07	2	552.797	2	552.797	35.52	2.72364	0.00333693	0.00333693	supercont2.1,+:1039425-1039451	exon2
TERG_00403T0	524	58.6	4.77	Trichophyton_rubrum_CBS_118892_beta-lactamase_(525_aa)	2	0.0668	supercont2.1,+:1058842-1060480	ANP02322	SGLSFSDFLHANFFQPLR		0.00344663	3	695.019	3	695.019	13.79	2.22421	0.785585	0.785585	supercont2.1,+:1059431-1059484	exon2
								ANP02323	FGAVIFGNSNNASNVAR		0.00267473	2	869.438	2	869.438	20.7	1.78208	1.1097	1.1097	supercont2.1,+:1059908-1059958	exon2
TERG_00413T0	220	24.4	5.53	Trichophyton_rubrum_CBS_118892_hypothetical_protein_(221_aa)	1	0.0818	supercont2.1,-:1086175-1086898	ANP02325	YQIGGAEDPTTFLEAFEK		4.01e-12	2	1008.48	2	1008.48	94.88	4.17551	-2.49804	-2.49804	supercont2.1,-:1086202-1086255	exon2
TERG_00414T0	339	36.7	6.55	Trichophyton_rubrum_CBS_118892_ketoreductase_(340_aa)	16	0.649	supercont2.1,+:1087514-1088938	ANP02326	ILLTGGSGFIAAHVLDTLLER		8.08e-11	2	1098.62	2	1098.62	52.99	4.03437	-4.24611	-4.24611	supercont2.1,+:1087523-1087651	exon1-2
								ANP02328	ILDAHPQVGK		2.39e-05	2	539.307	2	539.307	59.58	2.81584	1.47813	1.47813	supercont2.1,+:1087700-1087729	exon2
								ANP02329	ILDAHPQVGKDKLDFVVVEDIAQPNAFDK		0.00243062	4	806.18	4	806.18	12.59	2.26704	4.86092	4.86092	supercont2.1,+:1087700-1087855	exon2-3
								ANP02330	DKLDFVVVEDIAQPNAFDK		1.15e-09	2	1082.05	2	1082.05	89.87	4.82764	3.76905	3.76905	supercont2.1,+:1087730-1087855	exon2-3
								ANP02331	LDFVVVEDIAQPNAFDK		8.83e-09	2	960.493	2	960.493	63.45	3.19442	3.20953	0	supercont2.1,+:1087736-1087855	exon2-3
								ANP02332	AVISEPPFEAVIHTASPFHFK		2.1e-07	4	581.806	4	581.806	19.02	2.53855	-1.82663	-1.82663	supercont2.1,+:1087856-1087918	exon3
								ANP02333	KDLLAPAVNGTTGILHAIK		1.12e-13	3	644.712	3	644.712	80.58	5.11158	-2.5774	-2.5774	supercont2.1,+:1087934-1088054	exon3-4
								ANP02334	DLLAPAVNGTTGILHAIK		5.01e-15	2	902.519	2	902.519	54.14	3.23294	-1.3885	-1.3885	supercont2.1,+:1087937-1088054	exon3-4
								ANP02335	VVITSSFAAIIDPAKPSNYVYSEADWNPIKEDEVDK		0.00144268			4	1003.51		2.38425		1.82553	supercont2.1,+:1088079-1088252	exon4-5
								ANP02336	SPIFGYR		0.00969965	2	420.224	2	420.224	28.09	1.58061	-0.0179007	-0.0179007	supercont2.1,+:1088253-1088273	exon5
								ANP02337	ISDLITGK		0.00355362	2	423.751	2	423.751	39.61	2.11308	3.02098	3.02098	supercont2.1,+:1088567-1088590	exon7
								ANP02338	NSCPPTGTSLWVDVR	C3(Carboxymethyl)	1.02e-07	2	845.4	2	845.4	53.01	2.99758	2.06612	2.06612	supercont2.1,+:1088597-1088641	exon7
								ANP02339	DVAMAHVLAAEK		6.44e-06	2	627.828	2	627.828	48.86	2.87987	-1.8682	-1.8682	supercont2.1,+:1088642-1088677	exon7
								ANP02340	FFLVAGTYCNADVVEIISEK	C9(Carboxymethyl)	2.06e-05	2	1138.56	2	1138.56	21.88	2.81096	-0.260132	-4.80862	supercont2.1,+:1088699-1088758	exon7
								ANP02341	DKLPSGDALAPGR		1.36e-05	2	648.849	2	648.849	52.56	3.28581	0.191046	0.191046	supercont2.1,+:1088774-1088812	exon7
								ANP02344	DVLGLTYRPLTESVVDTVK		1.41e-15	2	1053.08	2	1053.08	85.58	4.67942	2.23262	2.23262	supercont2.1,+:1088858-1088914	exon7
TERG_00415T0	367	39.2	6.44	Trichophyton_rubrum_CBS_118892_KH_domain_RNA-binding_protein_(368_aa)	19	0.7003	supercont2.1,-:1090164-1091360	ANP02345	ALYLLYENLEAEK		1.24e-08	2	784.913	2	784.913	68.8	4.13096	-0.92835	-0.92835	supercont2.1,-:1090194-1090232	exon2
								ANP02346	MFTIMGSAQANEK		1.48e-10	2	714.336	2	714.336	63.38	3.26689	4.84058	-0.961197	supercont2.1,-:1090233-1090271	exon2
								ANP02347	GIPLVTEDGEEVQTQNISIPSDMVGCIIGR	C26(Carboxymethyl)	3.5e-05			3	1076.86		3.012		-0.0162245	supercont2.1,-:1090359-1090448	exon2
								ANP02348	TGNGADFSDHPSSYSR		9.63e-09	2	849.361	2	849.361	82.93	4.39432	3.7002	3.7002	supercont2.1,-:1090476-1090523	exon2
								ANP02349	ASVGSSSGQGSVTGTNPSYGGSSR		1.23e-14	2	1094	2	1094	146.8	4.54919	0.371343	0.371343	supercont2.1,-:1090536-1090607	exon2
								ANP02350	GTGTVLYNPAVR		2.75e-06	2	624.34	2	624.34	57.03	2.94479	-0.850721	-0.850721	supercont2.1,-:1090608-1090643	exon2
								ANP02351	CLIDDWQR	C1(Carboxymethyl)	6.58e-05	2	553.751	2	553.751	26.85	1.98477	0.481318	0.481318	supercont2.1,-:1090644-1090667	exon2
								ANP02352	AIWEIGK		0.00573949	2	408.735	2	408.735	32.82	2.03659	1.62127	1.62127	supercont2.1,-:1090668-1090688	exon2
								ANP02353	IVEVQGTPEGIEK		3.99e-09	2	699.878	2	699.878	86.8	3.37309	0.120937	0.120937	supercont2.1,-:1090689-1090727	exon2
								ANP02354	EMLPQSTER		0.000617661	2	545.764	2	545.764	39.74	1.6717	-0.311995	-0.311995	supercont2.1,-:1090728-1090754	exon2
								ANP02355	YIQDASGVR		1.73e-05	2	504.76	2	504.76	42.93	2.23198	1.16168	1.16168	supercont2.1,-:1090770-1090796	exon2
								ANP02356	LLISHNQMGTIIGR		2.55e-11	2	776.933	2	776.933	73.75	3.07483	-2.33278	-2.33278	supercont2.1,-:1090815-1090856	exon2
								ANP02357	SLLEGAPQMGMGGVVQNNGTHSVR		3.71e-16	2	1220.1	2	1220.1	87.03	4.73329	-0.728871	4.71507	supercont2.1,-:1090857-1091021	exon1-2
								ANP02359	VLTVTGPLQGTSK		2.5e-07	2	650.877	2	650.877	52.4	3.07208	2.25822	1.59198	supercont2.1,-:1091043-1091081	exon1
								ANP02360	VVQGVHDR		0.00283007	2	455.249	2	455.249	33.34	1.68447	0.51165	0.51165	supercont2.1,-:1091082-1091105	exon1
								ANP02363	TEEEYAQSMLTLR		3.14e-09	2	785.874	2	785.874	62.69	3.54079	-1.14214	-1.14214	supercont2.1,-:1091208-1091246	exon1
								ANP02364	VSVNDQPEAEAPPKTEEEYAQSMLTLR		3.93e-10	3	1011.48	3	1011.48	79.38	3.71893	-3.92154	-3.92154	supercont2.1,-:1091208-1091288	exon1
								ANP02365	VSVNDQPEAEAPPK		2.33e-07	2	740.867	2	740.867	67.69	3.50652	-0.124828	-0.124828	supercont2.1,-:1091247-1091288	exon1
								ANP02366	ESGPGPAEETLAESFSR		1.22e-11	2	882.407	2	882.407	90.84	3.72853	-1.36639	-1.36639	supercont2.1,-:1091289-1091339	exon1
TERG_00417T0	356	38.9	7.31	Trichophyton_rubrum_CBS_118892_alcohol_dehydrogenase_(357_aa)	4	0.2191	supercont2.1,-:1093908-1095289	ANP02367	IMPLTQAVEGYDMFDK		1.27e-09	2	929.44	2	929.44	92.46	3.56614	-1.8372	-1.8372	supercont2.1,-:1093947-1093994	exon6
								ANP02368	SIFPEALAMLEK		6.81e-06	2	674.86	2	674.86	23.86	2.36593	-3.38953	-3.38953	supercont2.1,-:1094094-1094129	exon5
								ANP02369	MAFDLLRPWGVISSVGVHNAEIPWNGNQAYGK		0.000362459	4	882.451			10.96		3.52451		supercont2.1,-:1094166-1094329	exon4-5
								ANP02371	SLLLGCPALDGGQAEYVR	C6(Carboxymethyl)	3.27e-11	2	960.479	2	960.479	102.39	4.24173	-1.55366	-1.55366	supercont2.1,-:1094726-1094842	exon3-4
TERG_00418T0	110	12.8	7.46	Trichophyton_rubrum_CBS_118892_yippee_zinc-binding_protein_Moh1_(111_aa)	2	0.2364	supercont2.1,-:1096386-1096782	ANP02372	DIHCTQCNETVGWK	C4(Carboxymethyl); C7(Carboxymethyl)	4.82e-07	2	875.361	2	875.361	49.41	3.49931	-3.78298	-3.78298	supercont2.1,-:1096470-1096511	exon2
								ANP02373	THLADYHDIISR		0.00914932	3	480.913	3	480.913	20.2	2.28963	0.976062	0.976062	supercont2.1,-:1096684-1096719	exon1
TERG_00423T0	1127	124.4	7.24	Trichophyton_rubrum_CBS_118892_CAMK/CAMKL/PASK_protein_kinase_(1128_aa)	3	0.0559	supercont2.1,+:1105664-1109221	ANP02376	SNLLGSYDAANHSVGPATGPPVPEAGGNIFDR		2.19e-05	3	1060.85	3	1060.85	47.12	3.25401	4.86499	4.86499	supercont2.1,+:1106268-1106363	exon2
								ANP02377	VLGTVPLEIHVLNFLR		0.000437156			3	607.365		1.29816		-0.119613	supercont2.1,+:1108449-1108496	exon2
								ANP02378	VPFLPFTDDCLDLIR	C10(Carboxymethyl)	1.16e-09	2	911.459	2	911.459	49.28	2.2754	0.901293	0.901293	supercont2.1,+:1109045-1109089	exon3
TERG_00425T0	332	37.7	9.38	Trichophyton_rubrum_CBS_118892_rRNA-processing_protein_EFG1_(333_aa)	2	0.0723	supercont2.1,-:1114413-1115478	ANP02381	LGITVTGER		0.000191242	2	473.27	2	473.27	32.28	2.28337	-4.86809	-4.86809	supercont2.1,-:1114602-1114628	exon2
								ANP02382	NNAAGSSGPSVNDLK		8.6e-07	2	715.848	2	715.848	54.14	2.98702	1.45355	1.45355	supercont2.1,-:1115314-1115358	exon1
TERG_00426T0	944	105	6.73	Trichophyton_rubrum_CBS_118892_hypothetical_protein_(945_aa)	5	0.0837	supercont2.1,+:1115927-1119053	ANP02384	GVVSQPVAITLLADK		1.54e-06	2	755.948	2	755.948	72.29	4.31885	3.40571	3.40571	supercont2.1,+:1117103-1117147	exon2
								ANP02385	DSAFPIDDNPSFDDALSWLTIPR		2.23e-06	2	1296.62	2	1296.62	80.39	3.54989	3.78776	3.78776	supercont2.1,+:1117406-1117474	exon2
								ANP02386	AIVSDNHSLQELWDWIR		3.01e-07	3	694.685	3	694.685	23.11	2.44366	-0.602417	-0.602417	supercont2.1,+:1117520-1117570	exon2
								ANP02387	SISQLFQELVHK		0.00343186	3	476.932	3	476.932	10.71	0.999123	-1.82515	-1.82515	supercont2.1,+:1117827-1117862	exon3
								ANP02388	AAALAIFQDEVK		5.59e-12	2	638.353	2	638.353	25.97	2.83384	3.7716	3.7716	supercont2.1,+:1118007-1118042	exon3
TERG_00427T0	336	36.1	7.53	Trichophyton_rubrum_CBS_118892_tRNA_splicing_2'_phosphotransferase_(337_aa)	4	0.1607	supercont2.1,+:1120829-1121891	ANP02391	QGYANVGELLQYR		2.3e-06	2	755.887	2	755.887	45.32	2.56054	0.673566	0.673566	supercont2.1,+:1120946-1121036	exon1-2
								ANP02392	STLSDVLEAVSTSDK		5.26e-10	2	776.39	2	776.39	88.6	3.27377	-1.39437	-1.39437	supercont2.1,+:1121055-1121099	exon2
								ANP02393	FGLLYIPGQPTSAEIK		1.41e-06	2	867.474	2	867.474	40.55	3.04273	-4.05902	-4.05902	supercont2.1,+:1121106-1121153	exon2
								ANP02395	GQDGVISGMR		0.0008884	2	510.25	2	510.25	32.29	1.40639	-1.68425	-1.68425	supercont2.1,+:1121517-1121546	exon2
TERG_00438T0	1383	155.2	8.78	Trichophyton_rubrum_CBS_118892_transcription_factor_SipA3_(1384_aa)	1	0.013	supercont2.1,+:1142028-1146597	ANP02427	ELEQSSLDLIDLVSDQVK		1.08e-06	2	1016.03	2	1016.03	59.84	3.50888	3.9114	3.9114	supercont2.1,+:1145603-1145656	exon7
TERG_00439T0	188	21	7.12	Trichophyton_rubrum_CBS_118892_hypothetical_protein_(189_aa)	1	0.1117	supercont2.1,-:1146903-1147469	ANP02430	SGHPPAIAPSAVTTLISSQPR	N-Term(Acetyl)	2.43e-06	2	1065.07			28.4		-3.05718		supercont2.1,-:1147404-1147466	exon1
TERG_00440T0	424	46.2	9.72	Trichophyton_rubrum_CBS_118892_UDP-Glc/Gal_endoplasmic_reticulum_nucleotide_sugar_transporter_(425_aa)	2	0.0731	supercont2.1,+:1147936-1149274	ANP02431	DIPDMNVDSTNGAIQQLEK		8.03e-12	2	1044.5	2	1044.5	52.13	3.46458	-2.58395	-2.58395	supercont2.1,+:1148005-1148061	exon1
								ANP02432	GMSTPSIFPTSR		0.000519136	2	640.821	2	640.821	32.49	1.76614	3.97002	3.97002	supercont2.1,+:1148396-1148431	exon2
TERG_00441T0	132	14.1	9.52	Trichophyton_rubrum_CBS_118892_peptidyl-prolyl_cis-trans_isomerase_(133_aa)	2	0.2045	supercont2.1,-:1149533-1150159	ANP02433	TGFGYHIIMVEGR		8.6e-05	3	493.92	3	493.92	28.21	2.09308	1.88294	1.88294	supercont2.1,-:1149539-1149577	exon3
								ANP02434	AAYELEPSTTGSPK		5.44e-05	2	725.857	2	725.857	38.94	2.73473	0.958921	0.958921	supercont2.1,-:1149593-1149634	exon3
TERG_00443T0	255	28.5	6.15	Trichophyton_rubrum_CBS_118892_hypothetical_protein_(256_aa)	3	0.2588	supercont2.1,+:1153476-1154340	ANP02437	INQLPDTAYYIPDFISEDEEGILLSK		0.00021974			3	995.165		2.37283		-0.924581	supercont2.1,+:1153524-1153601	exon1
								ANP02438	SNTLLASPLPDWLESPIASR		1.38e-11	2	1084.08	2	1084.08	50.76	3.6743	2.15351	2.15351	supercont2.1,+:1153777-1153836	exon2
								ANP02439	SLLITTGTLYSDFLHGIAEK		7.88e-12	2	1090.09	2	1090.09	79.41	4.62679	-0.448473	-0.448473	supercont2.1,+:1154110-1154169	exon2
TERG_00444T0	315	35.3	9.09	Trichophyton_rubrum_CBS_118892_hypothetical_protein_(316_aa)	2	0.1206	supercont2.1,-:1154365-1155482	ANP02442	EPSSKPSAVATVSPWSGIAGILNR		2.94e-08	3	808.766	3	808.766	55.87	3.69494	-2.31976	-2.47191	supercont2.1,-:1155151-1155222	exon2
								ANP02443	MDGLAGMDLVDWIR	N-Term(Acetyl)	2.7e-09	2	817.387	2	817.387	76.95	3.6884	-2.38917	-2.38917	supercont2.1,-:1155441-1155482	exon1
TERG_00445T0	1273	142.3	9.25	Trichophyton_rubrum_CBS_118892_histone_deacetylase_complex_subunit_(1274_aa)	1	0.0118	supercont2.1,+:1156351-1160292	ANP02446	GDMAGVATILNILQK		0.00103088	2	772.429	2	772.429	16.88	1.85411	-0.217271	-0.217271	supercont2.1,+:1157932-1157976	exon1
TERG_00446T0	151	16.4	5.08	Trichophyton_rubrum_CBS_118892_40S_ribosomal_protein_S12_(152_aa)	16	0.8543	supercont2.1,+:1161118-1161782	ANP02447	SDGEETTSNAGVVAADEVEVSANATAGSSMSVLDALK	N-Term(Acetyl)	6.09e-07	3	1208.9			45.03		4.25984		supercont2.1,+:1161255-1161365	exon2
								ANP02448	IALIHDGLAR		7.25e-06	2	539.823	2	539.823	43.6	2.60934	2.37505	1.68435	supercont2.1,+:1161378-1161407	exon2
								ANP02449	QAHMCVLNEGCEEEAYK	C5(Carboxymethyl); C11(Carboxymethyl)	3.7e-16	3	690.613	3	690.613	89.41	3.44214	-1.88665	-0.601043	supercont2.1,+:1161444-1161494	exon2
								ANP02450	QAHMCVLNEGCEEEAYKK	C5(Carboxymethyl); C11(Carboxymethyl)	3.73e-10	2	1099.47	2	1099.47	84.67	4.44168	2.48863	2.48863	supercont2.1,+:1161444-1161497	exon2
								ANP02451	KLVIALCSEHK	C7(Carboxymethyl)	2.11e-05	3	433.577	3	433.577	47.65	2.79294	2.03979	2.72771	supercont2.1,+:1161495-1161527	exon2
								ANP02452	LVIALCSEHK	C6(Carboxymethyl)	3.12e-06	2	585.813	2	585.813	37.04	2.28676	-0.510457	-0.510457	supercont2.1,+:1161498-1161527	exon2
								ANP02453	LVIALCSEHKIPLIK	C6(Carboxymethyl)	2.09e-07	4	434.509	4	434.509	12.54	2.11074	-2.1472	-2.1472	supercont2.1,+:1161498-1161542	exon2
								ANP02454	LVIALCSEHKIPLIKVPDGK	C6(Carboxymethyl)	0.00311962	3	744.431	3	744.431	22.8	2.49202	-2.03929	-2.03929	supercont2.1,+:1161498-1161557	exon2
								ANP02455	VPDGKMLGEWVGLCVLDR	N-Term(Acetyl); M6(Oxidation); C14(Carboxymethyl)	0.000312207			3	701.68		1.28059		0.0041973	supercont2.1,+:1161543-1161671	exon2-3
								ANP02456	MLGEWVGLCVLDR	M1(Oxidation); C9(Carboxymethyl)	6.56e-10	2	782.879	2	782.879	72.18	3.83097	0.842532	0.842532	supercont2.1,+:1161558-1161671	exon2-3
								ANP02457	KVVNCSCVVLK	C5(Carboxymethyl); C7(Carboxymethyl)	1.64e-05	2	654.341	2	654.341	55.7	3.15139	4.17632	4.17632	supercont2.1,+:1161687-1161719	exon3
								ANP02458	KVVNCSCVVLKDWGEESQER	C5(Carboxymethyl); C7(Carboxymethyl)	2.66e-07	3	808.714	3	808.714	42.97	3.42543	4.90312	4.90312	supercont2.1,+:1161687-1161746	exon3
								ANP02459	VVNCSCVVLK	C4(Carboxymethyl); C6(Carboxymethyl)	4.58e-06	2	590.291	2	590.291	50.99	2.45816	-0.100134	-0.100134	supercont2.1,+:1161690-1161719	exon3
								ANP02460	VVNCSCVVLKDWGEESQER	C4(Carboxymethyl); C6(Carboxymethyl)	1.18e-07	3	766.014	3	766.014	30.81	2.79564	2.76601	2.76601	supercont2.1,+:1161690-1161746	exon3
								ANP02461	DWGEESQER		0.00022321	2	568.237	2	568.237	12.19	1.80879	1.11447	1.11447	supercont2.1,+:1161720-1161746	exon3
								ANP02462	SILLNYFQTEQ		1.86e-13	2	678.348	2	678.348	76.39	3.81575	3.23933	3.23933	supercont2.1,+:1161747-1161779	exon3
TERG_00449T0	385	43	5.52	Trichophyton_rubrum_CBS_118892_mandelate_racemase/muconate_lactonizing_enzyme_(386_aa)	5	0.2416	supercont2.1,+:1165908-1167126	ANP02466	QIQGYEADDIEHIWQTAWR		0.00757119			3	787.043		1.38388		2.13419	supercont2.1,+:1166061-1166178	exon1-2
								ANP02468	LGVPIYQLLGGK		0.00462555	2	629.379	2	629.379	18.06	1.91855	-3.99838	-3.99838	supercont2.1,+:1166263-1166298	exon2
								ANP02469	MVEPYQPLFIEEPLLSEHPEGVK		4.44e-05	3	894.454	3	894.454	15.02	2.14197	-1.71698	-1.71698	supercont2.1,+:1166557-1166625	exon2
								ANP02470	QLSIQTTTPIALGER		1.03e-06	2	814.453	2	814.453	81.47	3.89855	-2.13331	-2.13331	supercont2.1,+:1166626-1166670	exon2
								ANP02471	FLEDASVDILQPDISHCGGVSELR	C17(Carboxymethyl)	3.09e-06	3	886.759	3	886.759	52.73	3.12449	-3.0477	-3.0477	supercont2.1,+:1166698-1166769	exon2
TERG_00450T0	387	41.2	5.52	Trichophyton_rubrum_CBS_118892_uridine_nucleosidase_(388_aa)	4	0.2196	supercont2.1,-:1167359-1168749	ANP02472	GVTIPQSLDVDKFWETIYDCLDR	C20(Carboxymethyl)	2.13e-07	3	924.447	3	924.447	39.48	3.46572	1.15751	1.15751	supercont2.1,-:1167398-1167466	exon5
								ANP02473	YDVSIHTDGLHHCVEGADLQGEIGR	C13(Carboxymethyl)	0.000560116			4	695.572		2.37646		-3.5479	supercont2.1,-:1167500-1167574	exon5
								ANP02474	TTLVTVDLTHQVLATK		8.81e-12	2	870.497	2	870.497	78.33	3.64438	-1.81941	-1.81941	supercont2.1,-:1167830-1167877	exon5
								ANP02475	GVSIMGGAVGGGFSSVPISQK		2e-09	2	968.002	2	968.002	88.94	3.8975	-2.42219	-2.42219	supercont2.1,-:1168043-1168105	exon4
TERG_00455T0	367	40.4	8.72	Trichophyton_rubrum_CBS_118892_developmentally_regulated_GTP-binding_protein_(368_aa)	15	0.5886	supercont2.1,-:1188079-1189856	ANP02477	VGLSHELADEDIITIVK		8.73e-10	2	926.505	2	926.505	78.83	4.70621	-2.35002	-2.35002	supercont2.1,-:1188085-1188220	exon9-10
								ANP02478	STACTVEDFCNSIHK	C4(Carboxymethyl); C10(Carboxymethyl)	3.71e-08	2	885.868	2	885.868	60.35	3.57021	-1.70597	-1.70597	supercont2.1,-:1188287-1188401	exon8-9
								ANP02479	NPDYNEPVVLR		2.56e-05	2	658.335	2	658.335	47.05	2.88409	-0.494453	-0.494453	supercont2.1,-:1188402-1188434	exon8
								ANP02480	IPNACPISSER	C5(Carboxymethyl)	4.7e-05	2	622.8	2	622.8	30.49	2.36959	-0.712998	-0.712998	supercont2.1,-:1188516-1188548	exon8
								ANP02481	IDAISIEELDLLYR		3.55e-07	2	831.95	2	831.95	48.49	3.58572	-1.11679	-1.11679	supercont2.1,-:1188549-1188590	exon8
								ANP02482	CDATIDDLIDVLEAR	C1(Carboxymethyl)	4.23e-16	2	860.411	2	860.411	74.67	4.3232	2.56488	2.56488	supercont2.1,-:1188630-1188674	exon8
								ANP02484	ISSADIAIR		0.00238567	2	473.272	2	473.272	34.97	1.66029	1.38585	1.38585	supercont2.1,-:1188675-1188701	exon8
								ANP02485	GGIAITNTVPLTHIDHSEIK		2.04e-06	4	529.789	4	529.789	16.89	3.0104	-1.85672	-1.85672	supercont2.1,-:1188723-1188864	exon7-8
								ANP02486	DKGGIAITNTVPLTHIDHSEIK		6.63e-08	3	787.088	3	787.088	34.62	4.31231	-4.59116	-4.59116	supercont2.1,-:1188723-1188870	exon7-8
								ANP02487	INKEPPNIIFK		9.3e-05	3	438.259	3	438.259	30.84	3.33628	0.0336026	0.0336026	supercont2.1,-:1188877-1188909	exon7
								ANP02488	IIENELEGFGIR		4.23e-09	2	695.37	2	695.37	79.15	3.12908	-3.3664	-3.3664	supercont2.1,-:1188910-1188945	exon7
								ANP02490	IQMLDLPGIIQGAK		5.33e-15	2	748.933			54.71		4.97394		supercont2.1,-:1189045-1189086	exon7
								ANP02491	LTGQHSEAAAYEFTTLTTVPGQVLYNGAK		2.54e-06	3	1023.18	3	1023.18	38.02	3.37743	-0.862583	-0.862583	supercont2.1,-:1189087-1189249	exon6-7
								ANP02492	TGVASVGFIGFPSVGK		1.12e-09	2	761.916	2	761.916	59.32	3.67825	-1.55964	-1.55964	supercont2.1,-:1189268-1189381	exon5-6
								ANP02493	ELLTPSGGGGGGGAGFDVAR		3.34e-13	2	887.941	2	887.941	65.06	2.38111	1.05612	1.05612	supercont2.1,-:1189382-1189516	exon4-5
TERG_00456T0	219	24.5	5.99	Trichophyton_rubrum_CBS_118892_cysteine_dioxygenase_(220_aa)	6	0.4247	supercont2.1,+:1190585-1191682	ANP02495	PFIENQTATADPIVPVDVK		3.89e-13	2	1027.54			88.02		-0.688535		supercont2.1,+:1190588-1190644	exon1
								ANP02496	LVDDLSAVLGPSSGLDSDDVDPMDIQK		2.1e-15	2	1401.17	2	1401.18	69.04	4.00317	1.93624	-2.36026	supercont2.1,+:1190666-1190746	exon1
								ANP02497	LMEGYVSNHEEWQR		3.76e-09	2	889.4	2	889.4	50.45	3.91317	-1.73355	-1.73355	supercont2.1,+:1190747-1190788	exon1
								ANP02498	SNLLIFVWNPGK		3.9e-07	2	694.39	2	694.39	39.67	2.50856	-0.40782	3.51332	supercont2.1,+:1190852-1191001	exon1-2
								ANP02500	YDWPEQDKINNGEACPLTVTK	C15(Carboxymethyl)	3.44e-05	3	827.053	3	827.053	34.33	3.22865	-0.657212	-0.200153	supercont2.1,+:1191222-1191284	exon3
								ANP02501	INNGEACPLTVTK	C7(Carboxymethyl)	0.0034635	2	709.352	2	709.352	20.24	2.21309	-1.69449	-1.69449	supercont2.1,+:1191246-1191284	exon3
TERG_00457T0	611	70.4	7.88	Trichophyton_rubrum_CBS_118892_capsule-associated_protein_CAP1_(612_aa)	2	0.0409	supercont2.1,+:1194143-1196043	ANP02502	EAIGFENALIGLMIR	M13(Oxidation)	0.000100933			3	554.967		2.1866		-0.483605	supercont2.1,+:1194623-1194667	exon1
								ANP02505	NEDLEVWFFR		2.1e-06	2	677.824	2	677.824	54.53	3.02314	-1.87574	-1.87574	supercont2.1,+:1195883-1195912	exon1
TERG_00458T0	479	53.1	7.25	Trichophyton_rubrum_CBS_118892_alpha/beta_hydrolase_(480_aa)	5	0.1608	supercont2.1,+:1196991-1198662	ANP02506	HLLSSSSIGEK		0.00311038	2	579.311	2	579.311	21.39	1.95809	-0.950935	-0.950935	supercont2.1,+:1197477-1197509	exon2
								ANP02509	TAEGEAYSESVR		2.89e-08	2	649.797	2	649.797	65.2	2.42321	0.312434	0.312434	supercont2.1,+:1198189-1198224	exon3
								ANP02511	SLETISALHSICPDER	C12(Carboxymethyl)	2.81e-07	2	914.938	2	914.938	48.21	2.68694	-3.52217	-3.52217	supercont2.1,+:1198303-1198350	exon3
								ANP02512	ANATLLWGMLDPAIDSHLALDGIADR		1.15e-09	3	917.138	3	917.138	88.85	3.53111	0.0190569	0.0190569	supercont2.1,+:1198405-1198482	exon3
								ANP02513	LIQGSQVIVLPR		2.35e-05	2	661.911	2	661.911	34.97	2.29286	0.0674913	0.0674913	supercont2.1,+:1198483-1198518	exon3
TERG_00459T0	756	83.9	6.02	Trichophyton_rubrum_CBS_118892_glycosyl_transferase_family_8_protein_(757_aa)	1	0.0251	supercont2.1,+:1199921-1202439	ANP02514	LAVLVTPDTLQPGIIDELK		5.05e-05	2	1018.09	2	1018.09	21.63	3.0749	0.355775	0.355775	supercont2.1,+:1200165-1200221	exon3
TERG_00460T0	616	68.9	4.84	Trichophyton_rubrum_CBS_118892_phosphotase_2a_65kd_regulatory_sububit_(617_aa)	30	0.6429	supercont2.1,-:1203253-1205671	ANP02515	LQQDDDVDVR		0.00164486	2	601.787	2	601.787	37.32	2.06393	1.98856	1.98856	supercont2.1,-:1203310-1203339	exon9
								ANP02516	GQTIIQQQILPNLEK		6.25e-15	2	861.991	2	861.991	46.36	3.9174	-0.232481	-0.232481	supercont2.1,-:1203340-1203384	exon9
								ANP02517	SEQAATPSPR		0.000364457	2	522.26	2	522.26	20.61	1.98166	0.221567	0.221567	supercont2.1,-:1203385-1203414	exon9
								ANP02518	KLPEEGTLSEADKSEQAATPSPR		3.73e-09	2	1221.11	2	1221.11	81.52	4.13534	-0.578611	-0.578611	supercont2.1,-:1203385-1203453	exon9
								ANP02519	KLPEEGTLSEADK		3.05e-05	2	708.864	2	708.864	57.81	2.81356	-1.14464	-1.14464	supercont2.1,-:1203415-1203453	exon9
								ANP02520	SYSVIIDTLR		2.87e-06	2	583.825	2	583.825	57.08	1.99238	0.360536	0.360536	supercont2.1,-:1203454-1203483	exon9
								ANP02521	LVTDDIPNIR		5.92e-07	2	578.321	2	578.321	54.31	2.96676	-2.23865	-2.23865	supercont2.1,-:1203499-1203528	exon9
								ANP02522	MIETSILPILDR		4.23e-16	2	700.897	2	700.897	76.44	3.59054	3.66732	3.66732	supercont2.1,-:1203529-1203564	exon9
								ANP02523	MTTCFAITTLAPVINLK	M1(Oxidation); C4(Carboxymethyl)	4.23e-16	2	956.005	2	956.005	65.61	3.3683	4.80562	3.79922	supercont2.1,-:1203565-1203677	exon8-9
								ANP02524	LTEVFGVDWANGSIIPK		2.38e-13	2	923.49	2	923.49	90.46	3.82076	-0.982027	-0.982027	supercont2.1,-:1203717-1203767	exon8
								ANP02525	KLTEVFGVDWANGSIIPK		7.21e-08	2	987.537	2	987.537	62.75	4.23459	-1.22929	-1.22929	supercont2.1,-:1203717-1203770	exon8
								ANP02527	LAIIEYIPLLASQLGVK		1.96e-13	3	614.376	3	614.376	96.34	4.92417	-0.0327264	-0.240924	supercont2.1,-:1203861-1203911	exon8
								ANP02528	VIGIDLLSQSLLPAIVQLAEDK		3.91e-16	2	1168.18	2	1168.18	95.79	4.75902	3.27574	3.27574	supercont2.1,-:1203927-1204051	exon7-8
								ANP02530	EETISHLLPMFLQMLK		1.6e-07	2	965.512	2	965.512	45.16	3.15402	-0.89542	-0.89542	supercont2.1,-:1204109-1204215	exon6-7
								ANP02531	AALGMQISGLAPILGK		2.69e-06	2	770.449	2	770.449	53.43	2.95394	-1.00411	-1.00411	supercont2.1,-:1204216-1204263	exon6
								ANP02532	ETLLNEIMTSIEDLVSDPSQHVR		1.99e-11	2	1313.65	2	1313.65	81.08	3.97307	-0.641685	-0.641685	supercont2.1,-:1204264-1204332	exon6
								ANP02533	TAIAGQIPGFCR	C11(Carboxymethyl)	1.87e-05	2	646.325	2	646.325	34.28	2.99117	-3.00499	-3.00499	supercont2.1,-:1204345-1204436	exon5-6
								ANP02534	LLKDTEAEVR		0.000674489	3	391.889	3	391.889	33.78	3.05567	4.35184	4.35184	supercont2.1,-:1204437-1204466	exon5
								ANP02535	AVDEEVVNRDLVPAFVK		2.07e-06	2	950.516	2	950.516	38.38	3.02125	4.24974	4.24974	supercont2.1,-:1204467-1204517	exon5
								ANP02536	AVDEEVVNR		3.97e-05	2	515.763	2	515.763	37.53	1.99531	1.91375	1.91375	supercont2.1,-:1204491-1204517	exon5
								ANP02539	EQQSSHGVLLTALR		1.67e-09	2	769.921	2	769.921	62.3	3.19239	4.1396	4.1396	supercont2.1,-:1204652-1204693	exon4
								ANP02540	LLTVEILISIAEEIPK		3.03e-08	3	594.363	3	594.363	49.79	3.96725	2.8674	4.0096	supercont2.1,-:1204694-1204741	exon4
								ANP02541	EMDSQVIIVEMVPLFQNLANDDQDSVR		2.45e-06	3	1035.83	3	1035.83	43.5	2.17456	-0.0724757	-0.0724757	supercont2.1,-:1204742-1204822	exon4
								ANP02542	QQFGQLVHDDTPMVR	M13(Oxidation)	4.87e-09	2	893.933	2	893.933	36.07	1.97109	2.8536	2.8536	supercont2.1,-:1204859-1204903	exon4
								ANP02543	TASPALQQGLR		4.42e-05	2	571.322	2	571.322	52.4	2.15231	4.38472	4.38472	supercont2.1,-:1204904-1204936	exon4
								ANP02544	ISAAGLYCTPYR	C8(Carboxymethyl)	2.35e-10	2	686.833	2	686.833	45.13	2.93199	2.21433	2.21433	supercont2.1,-:1204937-1204972	exon4
								ANP02546	QIEDNFIPLTIR		5.43e-06	2	729.9	2	729.9	47.66	2.6443	-1.74981	-1.74981	supercont2.1,-:1205003-1205038	exon4
								ANP02547	ICEQLSPR	C2(Carboxymethyl)	0.00312795	2	502.248	2	502.248	24.64	2.03966	0.294869	0.294869	supercont2.1,-:1205039-1205062	exon4
								ANP02548	LSTIALALGPER		1.03e-06	2	620.867	2	620.867	36.63	2.83638	0.17388	0.17388	supercont2.1,-:1205446-1205481	exon2
								ANP02550	MEGQGENDELYPIAVLIDELK	N-Term(Acetyl)	5.17e-12	2	1209.59	2	1209.59	74.26	4.19096	-0.516721	1.13929	supercont2.1,-:1205609-1205671	exon1
TERG_00461T0	600	67.2	5.54	Trichophyton_rubrum_CBS_118892_phenylalanyl-tRNA_synthetase_(601_aa)	19	0.49	supercont2.1,+:1206527-1208805	ANP02551	VVTPPSGELQTLLVKPETESVRPYVAGAVFR		2.48e-05	3	1113.95	3	1113.95	43.76	1.98879	0.664437	0.664437	supercont2.1,+:1207075-1207232	exon5-6
								ANP02552	YNSFIALQDK		0.000115617	2	599.811	2	599.811	44.08	2.63716	4.11586	4.11586	supercont2.1,+:1207257-1207286	exon6
								ANP02553	TLVSIGTHDLDTIQGPFTYEALPPK		1.33e-06	2	1357.21	2	1357.21	53.24	4.26387	4.09824	4.09824	supercont2.1,+:1207314-1207388	exon6
								ANP02554	CMDGEELMEFYEK	C1(Carboxymethyl)	4.36e-07	2	841.324	2	841.324	72	3.29826	-0.909885	-0.909885	supercont2.1,+:1207422-1207460	exon6
								ANP02555	DSPVYPVIYDSK		0.000408363	2	691.848	2	691.848	13.75	1.65118	3.05906	3.05906	supercont2.1,+:1207497-1207532	exon6
								ANP02556	TVCSLPPIINGDHSK	C3(Carboxymethyl)	8.56e-06	2	819.912	2	819.912	40.75	2.59279	0.82657	0.82657	supercont2.1,+:1207536-1207580	exon6
								ANP02557	NVFMEITATDR		1.12e-06	2	648.815	2	648.815	49.4	2.71911	-2.22695	-2.22695	supercont2.1,+:1207599-1207631	exon6
								ANP02559	VSETSDDTLDVTIPVTR		3.19e-12	2	924.464	2	924.464	81.38	3.58317	-1.11966	-1.11966	supercont2.1,+:1207937-1207987	exon7
								ANP02560	ADILHQADIMEDVAIAHGFNELPR		3.91e-16	2	1338.17	2	1338.17	106.27	5.62825	4.59361	-0.182441	supercont2.1,+:1207988-1208059	exon7
								ANP02561	SGTIAQPLPINK		5.66e-05	2	619.861	2	619.861	42.1	2.36623	4.10334	4.10334	supercont2.1,+:1208075-1208110	exon7
								ANP02562	TSLLPGLLK		4.01e-05	2	471.305	2	471.305	33.48	2.02299	-0.49238	-0.49238	supercont2.1,+:1208279-1208305	exon7
								ANP02563	NHSLPIK		0.00906282	2	404.738	2	404.738	35.29	2.19521	0.677104	0.677104	supercont2.1,+:1208324-1208344	exon7
								ANP02564	IFEVSDVGLK		1.99e-06	2	553.807	2	553.807	60.51	2.73288	-1.30984	-1.98278	supercont2.1,+:1208345-1208374	exon7
								ANP02565	HFAAAWYGK		0.00103738	2	525.762	2	525.762	12.49	1.4985	1.71507	1.71507	supercont2.1,+:1208411-1208437	exon7
								ANP02566	TSGFEVVHGLLDK		2.01e-13	2	701.372	2	701.372	74.03	3.10837	0.904635	-0.683398	supercont2.1,+:1208438-1208476	exon7
								ANP02567	SGFIVGEEGLDNAAVK		7.04e-12	2	803.409	2	803.409	72.57	3.39277	-0.175201	-0.175201	supercont2.1,+:1208495-1208542	exon7
								ANP02568	GSQYWIEELDDPTYFPGHAATIHLR		4.06e-10			4	729.856		2.847		2.33401	supercont2.1,+:1208543-1208685	exon7-8
								ANP02569	ESIIGTFGILHPTVLDNFDLR		1.7e-11	2	1179.13	2	1179.13	58.44	3.3399	0.820291	0.820291	supercont2.1,+:1208698-1208760	exon8
								ANP02570	HPVSALEINIETLL		0.00395087	2	774.938	2	774.938	15.58	2.34186	3.7983	3.7983	supercont2.1,+:1208761-1208802	exon8
TERG_00462T0	266	29.4	8.76	Trichophyton_rubrum_CBS_118892_40S_ribosomal_protein_S3_(267_aa)	25	0.8383	supercont2.1,-:1209139-1210197	ANP02571	LAEQEQEGQVVEGEAAEPQE		1.6e-16	2	1085.49	2	1085.49	117.86	4.38712	-1.1448	-1.1448	supercont2.1,-:1209142-1209201	exon3
								ANP02572	AAAAQQLAEQQR		4.75e-07	2	642.839	2	642.839	66.4	3.63653	3.97104	3.97104	supercont2.1,-:1209202-1209237	exon3
								ANP02573	EEQPVLQPMSQDYGAK		8.96e-10	2	910.434	2	910.434	60.8	3.19392	4.14655	4.14655	supercont2.1,-:1209238-1209285	exon3
								ANP02574	TLPDSVTIIEPKEEQPVLQPMSQDYGAK		0.0018182			3	1038.53		2.42281		4.93106	supercont2.1,-:1209238-1209321	exon3
								ANP02575	TLPDSVTIIEPK		8.03e-14	2	656.871	2	656.871	61.15	2.9683	3.36823	-1.06332	supercont2.1,-:1209286-1209321	exon3
								ANP02576	QGVLGIK		0.00243903	2	357.73	2	357.73	46.83	1.93401	2.48873	2.48873	supercont2.1,-:1209373-1209393	exon3
								ANP02577	DFIDHATR		0.000735008	1	974.471	1	974.471	35.06	2.29727	1.76703	1.58958	supercont2.1,-:1209409-1209432	exon3
								ANP02578	FTDGFMIHSGQPARDFIDHATR		0.00896833			4	630.555		2.30991		4.50805	supercont2.1,-:1209409-1209552	exon2-3
								ANP02579	FTDGFMIHSGQPAR		4.23e-16	2	782.375	2	782.375	41.97	3.39599	2.84356	2.84356	supercont2.1,-:1209433-1209552	exon2-3
								ANP02580	GCEVVVSGK	C2(Carboxymethyl)	1.12e-06	2	468.228	2	468.228	55.79	3.13555	-2.9207	-2.9207	supercont2.1,-:1209583-1209609	exon2
								ANP02581	FIMESGAK	M3(Oxidation)	0.000464965	2	449.722	2	449.722	43.2	2.25325	2.48401	2.48401	supercont2.1,-:1209610-1209633	exon2
								ANP02582	ACYGVLR	C2(Carboxymethyl)	0.00178248	2	420.207	2	420.207	36.66	1.8129	-1.23105	-1.23105	supercont2.1,-:1209634-1209654	exon2
								ANP02584	LLNGLAVR		2.36e-05	2	428.276	2	428.276	66.78	2.33641	3.44213	3.44213	supercont2.1,-:1209658-1209681	exon2
								ANP02585	GLSAVAQCESLR	C8(Carboxymethyl)	1.11e-10	2	646.321	2	646.321	54.16	3.11213	3.52417	3.52417	supercont2.1,-:1209688-1209723	exon2
								ANP02586	FPENSVSLYAAK		1.99e-11	2	663.34	2	663.34	54.22	2.96674	-0.474214	-0.474214	supercont2.1,-:1209736-1209771	exon2
								ANP02587	FKFPENSVSLYAAK		5.08e-09	2	800.921	2	800.921	57.52	2.98063	-1.6634	-1.6634	supercont2.1,-:1209736-1209777	exon2
								ANP02588	ELTSLIQK		0.00107495	2	466.277	2	466.277	46.81	2.18556	0.238553	0.238553	supercont2.1,-:1209781-1209804	exon2
								ANP02589	IRELTSLIQK		0.00555493	2	600.87	2	600.87	38.1	2.80817	1.77628	1.77628	supercont2.1,-:1209781-1209810	exon2
								ANP02590	ATHTQEVLGEQGRR		0.00147518	2	791.411	2	791.411	31.17	3.03743	3.50699	3.50699	supercont2.1,-:1209811-1209852	exon2
								ANP02591	ATHTQEVLGEQGR		6.49e-10	2	713.356	2	713.356	71.31	3.44711	-2.22938	-2.22938	supercont2.1,-:1209814-1209852	exon2
								ANP02592	VTPTVTDIIIR		1.07e-12	3	409.917	2	614.372	78.62	3.29727	4.63336	4.59702	supercont2.1,-:1209853-1210065	exon1-2
								ANP02593	ELAEEGYSGVEVR		2.86e-11	2	719.349	2	719.349	92.06	3.91056	3.20661	3.72257	supercont2.1,-:1210066-1210104	exon1
								ANP02594	FVADGVFYAELNEFFQR		4.23e-16	2	1026.5	2	1026.5	100.23	3.63191	3.30629	3.30629	supercont2.1,-:1210105-1210155	exon1
								ANP02595	SAAVQGAISKR	N-Term(Acetyl)	0.000286636	2	565.321			64.9		2.5467		supercont2.1,-:1210162-1210194	exon1
								ANP02596	SAAVQGAISK	N-Term(Acetyl)	5.9e-11	2	487.269			78.49		0.0913053		supercont2.1,-:1210165-1210194	exon1
TERG_00463T0	763	85.8	6.9	Trichophyton_rubrum_CBS_118892_protein_phosphatase_(764_aa)	1	0.0301	supercont2.1,-:1210858-1213211	ANP02599	ETSPVFHQFLDATYQLLYQHPTR		0.00102308	4	698.6	4	698.6	13.13	1.2707	-1.75272	-1.75272	supercont2.1,-:1211419-1211487	exon2
TERG_00464T0	804	91.5	6.28	Trichophyton_rubrum_CBS_118892_hypothetical_protein_(805_aa)	4	0.1007	supercont2.1,-:1213941-1216355	ANP02600	DVDMLLPESPVDIR		0.000604517	2	799.907	2	799.907	34.04	2.40355	-2.18436	-2.18436	supercont2.1,-:1214595-1214636	exon1
								ANP02601	IFINEVPNTLAFLDSLEAAASDDR		8.04e-12	2	1311.15	2	1311.15	97.31	3.21044	-4.16251	-4.16251	supercont2.1,-:1214793-1214864	exon1
								ANP02602	ASVGQCLFEGQPTHDPGQASFPNIEGLQTPR	C6(Carboxymethyl)	1.15e-08	3	1113.86	3	1113.86	65.11	5.33439	-2.42712	-2.42712	supercont2.1,-:1214865-1214957	exon1
								ANP02603	LLELLFDEDDLR		3.02e-08	2	745.888	2	745.888	52.54	2.7498	-3.18469	-3.18469	supercont2.1,-:1215003-1215038	exon1
TERG_00466T0	540	62	8.34	Trichophyton_rubrum_CBS_118892_hypothetical_protein_(541_aa)	1	0.0426	supercont2.1,-:1218814-1220762	ANP02605	FNPIEVVSNVLMHYATSLVLGPK		3.68e-05	3	843.456	3	843.456	34.11	2.50417	-1.6292	-1.6292	supercont2.1,-:1219838-1219906	exon5
TERG_00472T0	84	9.4	7.42	Trichophyton_rubrum_CBS_118892_splicing_factor_3B_subunit_10_(85_aa)	2	0.2381	supercont2.1,-:1233174-1233504	ANP02608	YEWTSNIIR		0.00337528	2	591.302	2	591.302	41.4	1.61774	2.02542	2.02542	supercont2.1,-:1233394-1233420	exon1
								ANP02610	TLQNLEALQAR		6.19e-05	2	628.853	2	628.853	40.53	3.13741	1.92692	1.92692	supercont2.1,-:1233454-1233486	exon1
TERG_00473T0	396	44.9	7.87	Trichophyton_rubrum_CBS_118892_hypothetical_protein_(397_aa)	1	0.0354	supercont2.1,-:1233786-1235091	ANP02611	AQQASVDEIFQAWR		0.000137493	2	824.911	2	824.911	30.76	1.94495	3.91555	3.91555	supercont2.1,-:1234041-1234082	exon3
TERG_00475T0	499	56	8.56	Trichophyton_rubrum_CBS_118892_c-14_sterol_reductase_(500_aa)	5	0.1242	supercont2.1,-:1237874-1239503	ANP02613	LMTSGWWGMAR		4.96e-07	2	648.303	2	648.303	55.08	1.70636	-3.23045	-3.23045	supercont2.1,-:1238177-1238209	exon3
								ANP02614	HIQYIETR		0.000840701	2	530.283	2	530.283	23.98	2.00751	-0.2712	-0.2712	supercont2.1,-:1238222-1238245	exon3
								ANP02615	IILPIPFVSENSR		1.25e-10	3	495.62	3	495.62	44.58	3.62132	-1.77457	-1.77457	supercont2.1,-:1238669-1238707	exon3
								ANP02616	ELAPGGQSGNIIYDYFIGR		1.75e-13	2	1035.51	2	1035.51	105.32	4.0714	-3.71713	-3.71713	supercont2.1,-:1238723-1238779	exon3
								ANP02617	AEVGWPENGIR		0.0020816	2	614.31	2	614.31	14.27	2.02738	1.32102	1.32102	supercont2.1,-:1239184-1239216	exon2
TERG_00476T0	333	36.4	6.19	Trichophyton_rubrum_CBS_118892_vacuolar_sorting_receptor_(334_aa)	1	0.03	supercont2.1,+:1240094-1241412	ANP02619	STLMSFLCDR	C8(Carboxymethyl)	0.000177869	2	615.781			44.89		3.89819		supercont2.1,+:1240784-1240813	exon2
TERG_00481T0	863	93.6	5.73	Trichophyton_rubrum_CBS_118892_beta-glucosidase_(864_aa)	20	0.3036	supercont2.1,-:1253413-1256361	ANP02620	NLPLQAPLPAPNLA		1.21e-06	2	714.912	2	714.912	48.12	2.6942	-2.79065	-2.79065	supercont2.1,-:1253416-1253457	exon6
								ANP02621	IVYVGSSSR		0.000600195	2	484.264	2	484.264	41.2	3.12556	0.822498	0.822498	supercont2.1,-:1253458-1253484	exon6
								ANP02622	DVSNWDPASQDWVMTENPK		3.8e-12	2	1109.98	2	1109.98	95.45	4.53329	-4.69729	-4.69729	supercont2.1,-:1253485-1253541	exon6
								ANP02623	RDVSNWDPASQDWVMTENPK		1.22e-05	3	792.362	3	792.362	51.44	3.56171	-0.32068	-0.32068	supercont2.1,-:1253485-1253544	exon6
								ANP02624	VGEEVPQLYISLGGDR		8.75e-07	2	866.452	2	866.452	56.42	3.97413	3.56775	3.56775	supercont2.1,-:1253629-1253749	exon5-6
								ANP02625	YVYSWLTSTDPK		2.34e-07	2	730.356	2	730.356	56.09	2.8082	-3.48991	-3.48991	supercont2.1,-:1253924-1253959	exon5
								ANP02626	YADYLFPGGFK		1.44e-06	2	639.311	2	639.311	45.42	2.63815	-3.5671	-3.5671	supercont2.1,-:1253972-1254004	exon5
								ANP02627	YVPATGMTKPAPR		0.000465067	2	694.874	2	694.874	37.92	1.82794	3.54034	3.54034	supercont2.1,-:1254026-1254064	exon5
								ANP02628	GAPQHLFSEGIMFEYR		4.63e-05	3	627.973	3	627.973	17.45	2.61052	4.74022	1.6953	supercont2.1,-:1254173-1254220	exon5
								ANP02631	GVGNVMSVLQNGDFK		8.19e-10	3	522.262	3	522.262	35.72	3.06688	-4.05615	-4.05615	supercont2.1,-:1254617-1254661	exon5
								ANP02633	EGYGVVNQR		0.00427827	2	511.259	2	511.259	28.41	2.00127	3.56996	3.56996	supercont2.1,-:1254938-1254964	exon5
								ANP02634	DQVQVPINFNSWTTDVEGYQHALVK		1.33e-10	2	1444.71	2	1444.71	81.23	3.57012	-3.74734	-3.74734	supercont2.1,-:1254965-1255039	exon5
								ANP02636	HFIANEQER		0.00120354	2	572.282	2	572.282	30.35	1.79541	1.67668	3.08705	supercont2.1,-:1255548-1255574	exon4
								ANP02637	SGVIACAK	C6(Carboxymethyl)	0.00776889	2	403.708	2	403.708	30.97	1.78333	1.32572	1.32572	supercont2.1,-:1255575-1255598	exon4
								ANP02639	NWEGLGPDPVLAGK		8.64e-09	2	726.875	2	726.875	87.16	3.4187	-3.42062	-3.42062	supercont2.1,-:1255632-1255673	exon4
								ANP02640	GADVILGPAIGPIGR		4.75e-08	2	703.409	2	703.409	72.07	4.1125	-4.26635	-3.56269	supercont2.1,-:1255692-1255736	exon4
								ANP02642	FGDYVTAFPAGINVAATWSR		1.21e-10	2	1072.03	2	1072.03	61.03	4.95281	-3.54793	-3.54793	supercont2.1,-:1255788-1255916	exon3-4
								ANP02643	SLCMQDGPLGIR	C3(Carboxymethyl)	2.86e-07	2	674.322	2	674.322	56.77	2.77957	-2.23651	-2.23651	supercont2.1,-:1255917-1255952	exon3
								ANP02644	AVSFVSQLTLAEK		1.53e-06	2	696.89	2	696.89	37.41	2.48343	-0.183615	-2.66999	supercont2.1,-:1256105-1256143	exon2
								ANP02645	GEGEWEAAYQK		6.66e-06	2	634.284	2	634.284	58.55	3.19552	1.365	1.365	supercont2.1,-:1256144-1256176	exon2
TERG_00483T0	121	13.6	9.23	Trichophyton_rubrum_CBS_118892_hypothetical_protein_(122_aa)	3	0.3719	supercont2.1,-:1258374-1258739	ANP02646	GAPIDGQVFEEEAMEAIK		2.07e-13	2	967.462	2	967.462	97.55	3.95166	-2.47355	-2.47355	supercont2.1,-:1258383-1258436	exon1
[truncated: 33,877 more rows]
